# Supplementary material for: Melting of aqueous NaCl solutions in porous materials: shifted phase transition distribution (SIDI) approach for determining NMR cryoporometry pore size distributions
Source: Royal Society of Chemistry journal article supplement (doi:10.1039/d3cp04029a), 2023-12-27
Supplement: d3cp04029a1.xlsx [file d3cp04029a1.xlsx]

## Sheet: Sheet1
Add measurement temperatures both to column A and row 19; measured signal intensities to column B; and saline intensities to column E
Use solver to minimize Diffsqusum (orange box), by letting parameters in yellow box to vary
										Melting point distribution is assumed to be a sum of three Gaussian distrubutions
						Diffsqusum				A1	A2	A3	Amplitude
						0.0172853				0.220858	0.0502967	0
										Tmp 1	Tmp 2	Tmp 3	Mean melting temperature
						k (KÅ)				275.011	252.106	242.792
						350				Sigma 1	Sigma 2	Sigma 3	Width of distribution
						T0 (K)				0.184237	9.39826	14.85
						273
							Mean pore diameter		Dm (Å)	24.7151
									D*PSDN	5.84652e-10	2.20736e-09	8.03027e-09	2.81487e-08	9.50713e-08	3.09381e-07	9.70024e-07	2.93025e-06	8.52801e-06	2.39111e-05	6.45877e-05	0.000168066	0.000421288	0.00101725	0.00236596	0.00530028	0.0114362	0.0237648	0.0475583	0.0916502	0.170068	0.303852	0.52265	0.865422	1.37932	2.11579	3.1231	4.43546	6.05973	7.96234	10.06	12.2182	14.2602	15.9878	17.2106	17.7791	17.6131	16.7189	15.1903	13.1922
							Pore diameter		D (Å)	7.95455	8.12065	8.29384	8.47458	8.66337	8.86076	9.06736	9.28382	9.51087	9.7493	10	10.2639	10.5422	10.8359	11.1465	11.4754	11.8243	12.1951	12.5899	13.0112	13.4615	13.9442	14.4628	15.0215	15.625	16.2791	16.9903	17.7665	18.617	19.5531	20.5882	21.7391	23.0263	24.4755	26.1194	28	30.1724	32.7103	35.7143	39.3258
					Max	0.0098238	Pore size distribution		PSD	7.22041e-13	2.67032e-12	9.51161e-12	3.26302e-11	1.07806e-10	3.43007e-10	1.05095e-09	3.10068e-09	8.8086e-09	2.40939e-08	6.34496e-08	1.60859e-07	3.9258e-07	9.22233e-07	2.0852e-06	4.53743e-06	9.50135e-06	1.91437e-05	3.71093e-05	6.91986e-05	0.00012411	0.000214066	0.000355007	0.000565972	0.000867212	0.0012768	0.00180578	0.00245254	0.00319759	0.00400042	0.0048002	0.00552134	0.00608388	0.00641705	0.00647309	0.00623779	0.00573462	0.00502115	0.00417835	0.00329548
					Sum	8.67413	Normalized PSD		PSDN	7.34992e-11	2.71821e-10	9.68221e-10	3.32155e-09	1.09739e-08	3.49159e-08	1.0698e-07	3.15629e-07	8.96659e-07	2.4526e-06	6.45877e-06	1.63745e-05	3.99621e-05	9.38774e-05	0.00021226	0.000461882	0.000967177	0.00194871	0.00377749	0.00704397	0.0126336	0.0217905	0.0361375	0.0576124	0.0882767	0.12997	0.183816	0.249653	0.325494	0.407217	0.48863	0.562037	0.6193	0.653214	0.65892	0.634967	0.583748	0.511121	0.425329	0.335458
							Sum D1	0.859385	MP D1	0	0	0	0	0	0	0	0	0	0	0	0	0	0	0	0	0	0	0	0	0	0	0	0	0	0	0	0	0	0	0	0	0	0	0	0	0	0	0	0
Tstep			Max				Sum D2	0.0500144	MP D2	3.26336e-14	1.25781e-13	4.67345e-13	1.67389e-12	5.77946e-12	1.92361e-11	6.17184e-11	1.9089e-10	5.6914e-10	1.63578e-09	4.53212e-09	1.21045e-08	3.11645e-08	7.7347e-08	1.85053e-07	4.26794e-07	9.48878e-07	2.03363e-06	4.20147e-06	8.36759e-06	1.60646e-05	2.97309e-05	5.30414e-05	9.12203e-05	0.00015123	0.000241687	0.000372338	0.000552957	0.000791616	0.00109246	0.00145335	0.00186381	0.0023041	0.00274581	0.00315435	0.00349316	0.00372904	0.00383746	0.0038068	0.00364038
1.8			0.011813				Sum D3	0	MP D3	0	0	0	0	0	0	0	0	0	0	0	0	0	0	0	0	0	0	0	0	0	0	0	0	0	0	0	0	0	0	0	0	0	0	0	0	0	0	0	0
			Conventional						MP Dtot	3.26336e-14	1.25781e-13	4.67345e-13	1.67389e-12	5.77946e-12	1.92361e-11	6.17184e-11	1.9089e-10	5.6914e-10	1.63578e-09	4.53212e-09	1.21045e-08	3.11645e-08	7.7347e-08	1.85053e-07	4.26794e-07	9.48878e-07	2.03363e-06	4.20147e-06	8.36759e-06	1.60646e-05	2.97309e-05	5.30414e-05	9.12203e-05	0.00015123	0.000241687	0.000372338	0.000552957	0.000791616	0.00109246	0.00145335	0.00186381	0.0023041	0.00274581	0.00315435	0.00349316	0.00372904	0.00383746	0.0038068	0.00364038
T (K)	Meas	D (Å)	PSD	PSDN	Fit	Diffsqu	Saline		T (K)	185	186.8	188.6	190.4	192.2	194	195.8	197.6	199.4	201.2	203	204.8	206.6	208.4	210.2	212	213.8	215.6	217.4	219.2	221	222.8	224.6	226.4	228.2	230	231.8	233.6	235.4	237.2	239	240.8	242.6	244.4	246.2	248	249.8	251.6	253.4	255.2
185	0.00151286	7.95455			0.000567254	8.94167e-07	0.000617402			3.26336e-14	1.13571e-13	2.32366e-13	4.86416e-13	1.0355e-12	2.31595e-12	5.45835e-12	1.33184e-11	3.2984e-11	8.19381e-11	2.00449e-10	4.80357e-10	1.13134e-09	2.61467e-09	3.72656e-09	2.57655e-09	2.11462e-09	3.35395e-09	5.93499e-09	9.75913e-09	1.77228e-08	3.05805e-08	5.01883e-08	9.34084e-08	1.48656e-07	2.11689e-07	3.17449e-07	4.58596e-07	7.07778e-07	9.24845e-07	1.15359e-06	1.40413e-06	1.85872e-06	2.19416e-06	2.29562e-06	2.53676e-06	2.62943e-06	3.02388e-06	2.81341e-06	2.67892e-06
186.8	0.00136531	8.12065	-0.00174022	-0.147315	0.000562391	6.4468e-07	0.000611076			3.26336e-14	1.25781e-13	4.21976e-13	8.32266e-13	1.67945e-12	3.44652e-12	7.43065e-12	1.68822e-11	3.9709e-11	9.48003e-11	2.27019e-10	5.35363e-10	1.23674e-09	2.80786e-09	6.25561e-09	8.5947e-09	5.72835e-09	4.53204e-09	6.92925e-09	1.18201e-08	1.87361e-08	3.27997e-08	5.45572e-08	8.63136e-08	1.54857e-07	2.37573e-07	3.26125e-07	4.71441e-07	6.56528e-07	9.76764e-07	1.23036e-06	1.47938e-06	1.73583e-06	2.21505e-06	2.52062e-06	2.54219e-06	2.70806e-06	2.70588e-06	2.99972e-06	2.69041e-06
188.6	0.00128177	8.29384	-0.000944591	-0.0799621	0.000551541	5.33234e-07	0.000597736			3.26336e-14	1.25781e-13	4.21976e-13	1.5114e-12	2.87357e-12	5.5898e-12	1.10581e-11	2.29823e-11	5.03345e-11	1.14129e-10	2.62655e-10	6.06326e-10	1.37836e-09	3.06946e-09	6.71781e-09	1.44275e-08	1.91083e-08	1.22769e-08	9.36318e-09	1.38002e-08	2.26928e-08	3.46751e-08	5.85163e-08	9.38272e-08	1.43095e-07	2.47484e-07	3.66e-07	4.84326e-07	6.74918e-07	9.06037e-07	1.29943e-06	1.57784e-06	1.82887e-06	2.06861e-06	2.54462e-06	2.79136e-06	2.71385e-06	2.78679e-06	2.68426e-06	2.86858e-06
190.4	0.00138291	8.47458	0.00109528	0.0927184	0.000560748	6.75943e-07	0.00060765			3.26336e-14	1.25781e-13	4.67345e-13	1.67389e-12	5.21841e-12	9.56425e-12	1.79347e-11	3.42016e-11	6.85222e-11	1.44668e-10	3.16206e-10	7.01504e-10	1.56106e-09	3.42094e-09	7.3437e-09	1.54935e-08	3.20762e-08	4.09527e-08	2.53642e-08	1.86476e-08	2.64944e-08	4.19978e-08	6.18622e-08	1.00636e-07	1.55552e-07	2.28687e-07	3.8127e-07	5.43545e-07	6.93364e-07	9.31415e-07	1.20533e-06	1.66641e-06	1.95057e-06	2.17947e-06	2.37639e-06	2.81794e-06	2.97985e-06	2.79276e-06	2.76453e-06	2.56691e-06
192.2	0.00148655	8.66337	0.00107402	0.0909187	0.00057334	8.33945e-07	0.000621368			3.26336e-14	1.25781e-13	4.67345e-13	1.67389e-12	5.77946e-12	1.73687e-11	3.06866e-11	5.54705e-11	1.01973e-10	1.96942e-10	4.00818e-10	8.44531e-10	1.80611e-09	3.8744e-09	8.18463e-09	1.6937e-08	3.44462e-08	6.87455e-08	8.46083e-08	5.0515e-08	3.58007e-08	4.90335e-08	7.49262e-08	1.0639e-07	1.6684e-07	2.48594e-07	3.5231e-07	5.66221e-07	7.78141e-07	9.56872e-07	1.2391e-06	1.54575e-06	2.06008e-06	2.32452e-06	2.50375e-06	2.63164e-06	3.00822e-06	3.06649e-06	2.77045e-06	2.64367e-06
194	0.00158383	8.86076	0.00096371	0.0815806	0.00057967	1.00833e-06	0.00062757			3.26336e-14	1.25781e-13	4.67345e-13	1.67389e-12	5.77946e-12	1.92361e-11	5.5727e-11	9.49111e-11	1.65386e-10	2.93082e-10	5.45649e-10	1.07051e-09	2.17435e-09	4.48258e-09	9.26951e-09	1.88765e-08	3.76555e-08	7.38248e-08	1.42028e-07	1.68505e-07	9.69815e-08	6.62567e-08	8.74782e-08	1.28858e-07	1.76379e-07	2.66634e-07	3.82979e-07	5.23214e-07	8.10605e-07	1.07387e-06	1.27296e-06	1.58905e-06	1.91091e-06	2.45501e-06	2.67037e-06	2.77268e-06	2.80934e-06	3.09568e-06	3.04199e-06	2.64933e-06
195.8	0.00129359	9.06736	-0.00274571	-0.232432	0.000604873	4.74326e-07	0.00065535			3.26336e-14	1.25781e-13	4.67345e-13	1.67389e-12	5.77946e-12	1.92361e-11	6.17184e-11	1.72359e-10	2.82979e-10	4.75341e-10	8.12017e-10	1.45733e-09	2.75618e-09	5.39651e-09	1.07246e-08	2.13786e-08	4.19674e-08	8.07029e-08	1.52522e-07	2.82862e-07	3.23505e-07	1.79484e-07	1.18205e-07	1.50445e-07	2.13627e-07	2.81879e-07	4.10771e-07	5.6876e-07	7.49036e-07	1.11867e-06	1.42861e-06	1.63248e-06	1.96443e-06	2.27724e-06	2.82028e-06	2.9572e-06	2.9599e-06	2.89102e-06	3.07095e-06	2.909e-06
197.6	0.00154169	9.28382	0.00223887	0.189526	0.000636038	8.20198e-07	0.000689438			3.26336e-14	1.25781e-13	4.67345e-13	1.67389e-12	5.77946e-12	1.92361e-11	6.17184e-11	1.9089e-10	5.1389e-10	8.13317e-10	1.31698e-09	2.16875e-09	3.75208e-09	6.84054e-09	1.29112e-08	2.47345e-08	4.75303e-08	8.99442e-08	1.66732e-07	3.03761e-07	5.43054e-07	5.98714e-07	3.2021e-07	2.03289e-07	2.49415e-07	3.41406e-07	4.34258e-07	6.10033e-07	8.14239e-07	1.0337e-06	1.48821e-06	1.83208e-06	2.01812e-06	2.34103e-06	2.61607e-06	3.12321e-06	3.15688e-06	3.04596e-06	2.86792e-06	2.93669e-06
199.4	0.0014115	9.51087	-0.00111942	-0.0947615	0.00064569	5.86459e-07	0.000697468			3.26336e-14	1.25781e-13	4.67345e-13	1.67389e-12	5.77946e-12	1.92361e-11	6.17184e-11	1.9089e-10	5.6914e-10	1.47699e-09	2.25339e-09	3.51743e-09	5.58373e-09	9.31227e-09	1.6366e-08	2.97775e-08	5.49914e-08	1.01867e-07	1.85825e-07	3.32062e-07	5.83177e-07	1.00503e-06	1.06814e-06	5.50695e-07	3.37023e-07	3.98601e-07	5.25964e-07	6.44914e-07	8.73327e-07	1.12369e-06	1.37517e-06	1.90851e-06	2.26488e-06	2.40501e-06	2.68934e-06	2.89706e-06	3.3341e-06	3.24867e-06	3.02163e-06	2.74254e-06
201.2	0.001688	9.7493	0.00226258	0.191533	0.000645342	1.08713e-06	0.000692219			3.26336e-14	1.25781e-13	4.67345e-13	1.67389e-12	5.77946e-12	1.92361e-11	6.17184e-11	1.9089e-10	5.6914e-10	1.63578e-09	4.09215e-09	6.01839e-09	9.05607e-09	1.38582e-08	2.22797e-08	3.77455e-08	6.62033e-08	1.17857e-07	2.10456e-07	3.70086e-07	6.37511e-07	1.07929e-06	1.79303e-06	1.83698e-06	9.12971e-07	5.38611e-07	6.14077e-07	7.81107e-07	9.23263e-07	1.20523e-06	1.49488e-06	1.76355e-06	2.35937e-06	2.69907e-06	2.76285e-06	2.97821e-06	3.09268e-06	3.43104e-06	3.22271e-06	2.88953e-06
203	0.00159192	10	-0.00074727	-0.0632584	0.000640973	9.04298e-07	0.000679737			3.26336e-14	1.25781e-13	4.67345e-13	1.67389e-12	5.77946e-12	1.92361e-11	6.17184e-11	1.9089e-10	5.6914e-10	1.63578e-09	4.53212e-09	1.09294e-08	1.54951e-08	2.24762e-08	3.31559e-08	5.13843e-08	8.39183e-08	1.41886e-07	2.43492e-07	4.19142e-07	7.10512e-07	1.17985e-06	1.92551e-06	3.08365e-06	3.04544e-06	1.45906e-06	8.29774e-07	9.11962e-07	1.11824e-06	1.27414e-06	1.60336e-06	1.91707e-06	2.18016e-06	2.81168e-06	3.10066e-06	3.0596e-06	3.17931e-06	3.1826e-06	3.40363e-06	3.08182e-06
204.8	0.00148031	10.2639	-0.000823997	-0.0697535	0.000698906	6.10593e-07	0.00073589			3.26336e-14	1.25781e-13	4.67345e-13	1.67389e-12	5.77946e-12	1.92361e-11	6.17184e-11	1.9089e-10	5.6914e-10	1.63578e-09	4.53212e-09	1.21045e-08	2.81391e-08	3.84573e-08	5.37745e-08	7.64686e-08	1.14241e-07	1.79853e-07	2.93137e-07	4.84936e-07	8.04692e-07	1.31495e-06	2.10491e-06	3.31148e-06	5.11224e-06	4.86704e-06	2.2478e-06	1.23229e-06	1.30557e-06	1.54321e-06	1.69504e-06	2.05619e-06	2.36995e-06	2.59812e-06	3.23002e-06	3.4337e-06	3.2662e-06	3.27175e-06	3.15718e-06	3.25483e-06
206.6	0.00171137	10.5422	0.00161706	0.136888	0.000716161	9.90448e-07	0.000739049			3.26336e-14	1.25781e-13	4.67345e-13	1.67389e-12	5.77946e-12	1.92361e-11	6.17184e-11	1.9089e-10	5.6914e-10	1.63578e-09	4.53212e-09	1.21045e-08	3.11645e-08	6.98384e-08	9.20092e-08	1.24022e-07	1.7001e-07	2.4484e-07	3.71576e-07	5.83808e-07	9.31008e-07	1.48925e-06	2.34594e-06	3.62001e-06	5.48995e-06	8.17008e-06	7.49807e-06	3.33819e-06	1.76416e-06	1.80174e-06	2.053e-06	2.17376e-06	2.54193e-06	2.82428e-06	2.98468e-06	3.57696e-06	3.66556e-06	3.36117e-06	3.24561e-06	3.01915e-06
208.4	0.00166299	10.8359	-0.000320499	-0.0271311	0.000779712	7.8018e-07	0.00078799			3.26336e-14	1.25781e-13	4.67345e-13	1.67389e-12	5.77946e-12	1.92361e-11	6.17184e-11	1.9089e-10	5.6914e-10	1.63578e-09	4.53212e-09	1.21045e-08	3.11645e-08	7.7347e-08	1.67089e-07	2.12204e-07	2.75734e-07	3.64364e-07	5.0584e-07	7.40026e-07	1.12083e-06	1.72303e-06	2.6569e-06	4.03454e-06	6.00144e-06	8.77373e-06	1.25867e-05	1.11353e-05	4.77897e-06	2.43461e-06	2.39693e-06	2.63281e-06	2.68727e-06	3.02924e-06	3.2445e-06	3.30527e-06	3.81849e-06	3.77214e-06	3.33432e-06	3.10372e-06
210.2	0.00161758	11.1465	-0.000284275	-0.0240646	0.000739612	7.70826e-07	0.000705122			3.26336e-14	1.25781e-13	4.67345e-13	1.67389e-12	5.77946e-12	1.92361e-11	6.17184e-11	1.9089e-10	5.6914e-10	1.63578e-09	4.53212e-09	1.21045e-08	3.11645e-08	7.7347e-08	1.85053e-07	3.85363e-07	4.71786e-07	5.9095e-07	7.52775e-07	1.00742e-06	1.42074e-06	2.07433e-06	3.07397e-06	4.56932e-06	6.68867e-06	9.59116e-06	1.35166e-05	1.86924e-05	1.59414e-05	6.59518e-06	3.23886e-06	3.07387e-06	3.25477e-06	3.20244e-06	3.47995e-06	3.59299e-06	3.52845e-06	3.92951e-06	3.742e-06	3.18854e-06
212	0.00214696	11.4754	0.00312669	0.264682	0.000801866	1.80927e-06	0.000726208			3.26336e-14	1.25781e-13	4.67345e-13	1.67389e-12	5.77946e-12	1.92361e-11	6.17184e-11	1.9089e-10	5.6914e-10	1.63578e-09	4.53212e-09	1.21045e-08	3.11645e-08	7.7347e-08	1.85053e-07	4.26794e-07	8.56764e-07	1.01113e-06	1.2209e-06	1.49922e-06	1.93411e-06	2.62938e-06	3.70071e-06	5.28659e-06	7.57527e-06	1.06894e-05	1.4776e-05	2.00735e-05	2.67601e-05	2.19998e-05	8.77382e-06	4.15358e-06	3.80002e-06	3.87873e-06	3.67892e-06	3.85373e-06	3.83561e-06	3.63105e-06	3.89812e-06	3.57841e-06
213.8	0.00181146	11.8243	-0.00186636	-0.157992	0.000864507	8.96715e-07	0.000727763			3.26336e-14	1.25781e-13	4.67345e-13	1.67389e-12	5.77946e-12	1.92361e-11	6.17184e-11	1.9089e-10	5.6914e-10	1.63578e-09	4.53212e-09	1.21045e-08	3.11645e-08	7.7347e-08	1.85053e-07	4.26794e-07	9.48878e-07	1.83621e-06	2.08899e-06	2.43153e-06	2.87828e-06	3.57948e-06	4.69096e-06	6.36445e-06	8.76439e-06	1.21064e-05	1.6468e-05	2.19437e-05	2.87373e-05	3.69301e-05	2.92672e-05	1.12518e-05	5.1348e-06	4.52852e-06	4.45584e-06	4.07408e-06	4.11395e-06	3.94713e-06	3.60204e-06	3.7277e-06
215.6	0.00186657	12.1951	0.000288209	0.0243977	0.00100942	7.34704e-07	0.000799093			3.26336e-14	1.25781e-13	4.67345e-13	1.67389e-12	5.77946e-12	1.92361e-11	6.17184e-11	1.9089e-10	5.6914e-10	1.63578e-09	4.53212e-09	1.21045e-08	3.11645e-08	7.7347e-08	1.85053e-07	4.26794e-07	9.48878e-07	2.03363e-06	3.7936e-06	4.1604e-06	4.6682e-06	5.32686e-06	6.38597e-06	8.06749e-06	1.05513e-05	1.40067e-05	1.86508e-05	2.44565e-05	3.14147e-05	3.96587e-05	4.91295e-05	3.75329e-05	1.39098e-05	6.11918e-06	5.2023e-06	4.93444e-06	4.34918e-06	4.23356e-06	3.91559e-06	3.44456e-06
217.4	0.00195994	12.5899	0.000458181	0.0387862	0.00112823	6.91734e-07	0.0008067			3.26336e-14	1.25781e-13	4.67345e-13	1.67389e-12	5.77946e-12	1.92361e-11	6.17184e-11	1.9089e-10	5.6914e-10	1.63578e-09	4.53212e-09	1.21045e-08	3.11645e-08	7.7347e-08	1.85053e-07	4.26794e-07	9.48878e-07	2.03363e-06	4.20147e-06	7.55529e-06	7.98737e-06	8.63947e-06	9.5034e-06	1.09826e-05	1.33747e-05	1.68625e-05	2.15785e-05	2.76982e-05	3.5012e-05	4.33537e-05	5.27595e-05	6.30049e-05	4.63995e-05	1.65764e-05	7.02963e-06	5.76108e-06	5.26763e-06	4.47563e-06	4.19974e-06	3.74441e-06
219.2	0.00202672	13.0112	0.000306817	0.0259729	0.00123144	6.32475e-07	0.000753367			3.26336e-14	1.25781e-13	4.67345e-13	1.67389e-12	5.77946e-12	1.92361e-11	6.17184e-11	1.9089e-10	5.6914e-10	1.63578e-09	4.53212e-09	1.21045e-08	3.11645e-08	7.7347e-08	1.85053e-07	4.26794e-07	9.48878e-07	2.03363e-06	4.20147e-06	8.36759e-06	1.45051e-05	1.47823e-05	1.54133e-05	1.63439e-05	1.82075e-05	2.13747e-05	2.59781e-05	3.20461e-05	3.96529e-05	4.83181e-05	5.7675e-05	6.766e-05	7.78887e-05	5.52947e-05	1.90428e-05	7.78469e-06	6.1501e-06	5.42079e-06	4.43988e-06	4.01614e-06
221	0.00243707	13.4615	0.00176124	0.149093	0.00146243	9.49914e-07	0.000793744			3.26336e-14	1.25781e-13	4.67345e-13	1.67389e-12	5.77946e-12	1.92361e-11	6.17184e-11	1.9089e-10	5.6914e-10	1.63578e-09	4.53212e-09	1.21045e-08	3.11645e-08	7.7347e-08	1.85053e-07	4.26794e-07	9.48878e-07	2.03363e-06	4.20147e-06	8.36759e-06	1.60646e-05	2.68447e-05	2.63724e-05	2.65076e-05	2.70958e-05	2.90981e-05	3.29294e-05	3.85799e-05	4.58774e-05	5.47228e-05	6.42794e-05	7.39637e-05	8.36436e-05	9.28206e-05	6.35217e-05	2.10881e-05	8.31035e-06	6.32891e-06	5.37749e-06	4.24577e-06
222.8	0.00259992	13.9442	0.000651399	0.0551427	0.00176525	6.96664e-07	0.000846567			3.26336e-14	1.25781e-13	4.67345e-13	1.67389e-12	5.77946e-12	1.92361e-11	6.17184e-11	1.9089e-10	5.6914e-10	1.63578e-09	4.53212e-09	1.21045e-08	3.11645e-08	7.7347e-08	1.85053e-07	4.26794e-07	9.48878e-07	2.03363e-06	4.20147e-06	8.36759e-06	1.60646e-05	2.97309e-05	4.78923e-05	4.53551e-05	4.39458e-05	4.33029e-05	4.4828e-05	4.89033e-05	5.52312e-05	6.33128e-05	7.27997e-05	8.24334e-05	9.14365e-05	9.96787e-05	0.000106631	7.03446e-05	2.25121e-05	8.55197e-06	6.27835e-06	5.14239e-06
224.6	0.00328077	14.4628	0.00253163	0.214309	0.00214308	1.29432e-06	0.000894092			3.26336e-14	1.25781e-13	4.67345e-13	1.67389e-12	5.77946e-12	1.92361e-11	6.17184e-11	1.9089e-10	5.6914e-10	1.63578e-09	4.53212e-09	1.21045e-08	3.11645e-08	7.7347e-08	1.85053e-07	4.26794e-07	9.48878e-07	2.03363e-06	4.20147e-06	8.36759e-06	1.60646e-05	2.97309e-05	5.30414e-05	8.23649e-05	7.51921e-05	7.02316e-05	6.67117e-05	6.65738e-05	7.00102e-05	7.62214e-05	8.42274e-05	9.33601e-05	0.000101907	0.000108966	0.00011451	0.000118084	7.50946e-05	2.31667e-05	8.48365e-06	6.00387e-06
226.4	0.00346299	15.0215	0.000628106	0.0531708	0.00252816	8.73895e-07	0.000829351			3.26336e-14	1.25781e-13	4.67345e-13	1.67389e-12	5.77946e-12	1.92361e-11	6.17184e-11	1.9089e-10	5.6914e-10	1.63578e-09	4.53212e-09	1.21045e-08	3.11645e-08	7.7347e-08	1.85053e-07	4.26794e-07	9.48878e-07	2.03363e-06	4.20147e-06	8.36759e-06	1.60646e-05	2.97309e-05	5.30414e-05	9.12203e-05	0.000136549	0.000120168	0.000108198	9.90731e-05	9.53074e-05	9.66171e-05	0.0001014	0.000108015	0.000115415	0.000121443	0.000125178	0.000126809	0.000126058	7.7278e-05	2.29816e-05	8.11276e-06
228.2	0.00402513	15.625	0.00179085	0.1516	0.00312333	8.13249e-07	0.000852582			3.26336e-14	1.25781e-13	4.67345e-13	1.67389e-12	5.77946e-12	1.92361e-11	6.17184e-11	1.9089e-10	5.6914e-10	1.63578e-09	4.53212e-09	1.21045e-08	3.11645e-08	7.7347e-08	1.85053e-07	4.26794e-07	9.48878e-07	2.03363e-06	4.20147e-06	8.36759e-06	1.60646e-05	2.97309e-05	5.30414e-05	9.12203e-05	0.00015123	0.000218225	0.000185128	0.000160683	0.000141834	0.000131528	0.000128533	0.000130038	0.000133532	0.000137541	0.000139512	0.000138624	0.000135372	0.000129723	7.66606e-05	2.19769e-05
230	0.00414937	16.2791	0.000364641	0.0308678	0.00389043	6.705e-08	0.000875883			3.26336e-14	1.25781e-13	4.67345e-13	1.67389e-12	5.77946e-12	1.92361e-11	6.17184e-11	1.9089e-10	5.6914e-10	1.63578e-09	4.53212e-09	1.21045e-08	3.11645e-08	7.7347e-08	1.85053e-07	4.26794e-07	9.48878e-07	2.03363e-06	4.20147e-06	8.36759e-06	1.60646e-05	2.97309e-05	5.30414e-05	9.12203e-05	0.00015123	0.000241687	0.000336193	0.000274933	0.000230035	0.000195736	0.000174977	0.000164834	0.000160757	0.000159131	0.000158005	0.000154497	0.000147984	0.000139308	0.000128687	7.33092e-05
231.8	0.00508291	16.9903	0.00251528	0.212925	0.00494442	1.91797e-08	0.000982978			3.26336e-14	1.25781e-13	4.67345e-13	1.67389e-12	5.77946e-12	1.92361e-11	6.17184e-11	1.9089e-10	5.6914e-10	1.63578e-09	4.53212e-09	1.21045e-08	3.11645e-08	7.7347e-08	1.85053e-07	4.26794e-07	9.48878e-07	2.03363e-06	4.20147e-06	8.36759e-06	1.60646e-05	2.97309e-05	5.30414e-05	9.12203e-05	0.00015123	0.000241687	0.000372338	0.000499278	0.000393595	0.000317459	0.000260396	0.000224395	0.000203774	0.000191576	0.000182808	0.000174976	0.00016493	0.000152287	0.000138195	0.000123061
233.6	0.00602412	17.7665	0.0023192	0.196326	0.00620232	3.17565e-08	0.00102399			3.26336e-14	1.25781e-13	4.67345e-13	1.67389e-12	5.77946e-12	1.92361e-11	6.17184e-11	1.9089e-10	5.6914e-10	1.63578e-09	4.53212e-09	1.21045e-08	3.11645e-08	7.7347e-08	1.85053e-07	4.26794e-07	9.48878e-07	2.03363e-06	4.20147e-06	8.36759e-06	1.60646e-05	2.97309e-05	5.30414e-05	9.12203e-05	0.00015123	0.000241687	0.000372338	0.000552957	0.000714769	0.000543178	0.000422327	0.000333937	0.000277404	0.000242839	0.00022008	0.000202443	0.000186792	0.000169725	0.00015107	0.000132153
235.4	0.00717195	18.617	0.0025758	0.218048	0.00766307	2.412e-07	0.00094621			3.26336e-14	1.25781e-13	4.67345e-13	1.67389e-12	5.77946e-12	1.92361e-11	6.17184e-11	1.9089e-10	5.6914e-10	1.63578e-09	4.53212e-09	1.21045e-08	3.11645e-08	7.7347e-08	1.85053e-07	4.26794e-07	9.48878e-07	2.03363e-06	4.20147e-06	8.36759e-06	1.60646e-05	2.97309e-05	5.30414e-05	9.12203e-05	0.00015123	0.000241687	0.000372338	0.000552957	0.000791616	0.000986412	0.00072261	0.000541602	0.000412825	0.000330585	0.00027897	0.000243719	0.000216113	0.000192223	0.000168369	0.000144466
237.2	0.00953775	19.5531	0.00481286	0.407422	0.00960292	4.24813e-09	0.00102858			3.26336e-14	1.25781e-13	4.67345e-13	1.67389e-12	5.77946e-12	1.92361e-11	6.17184e-11	1.9089e-10	5.6914e-10	1.63578e-09	4.53212e-09	1.21045e-08	3.11645e-08	7.7347e-08	1.85053e-07	4.26794e-07	9.48878e-07	2.03363e-06	4.20147e-06	8.36759e-06	1.60646e-05	2.97309e-05	5.30414e-05	9.12203e-05	0.00015123	0.000241687	0.000372338	0.000552957	0.000791616	0.00109246	0.00131226	0.000926692	0.000669547	0.000491966	0.000379771	0.000308934	0.000260176	0.000222397	0.000190687	0.000161008
239	0.0116403	20.5882	0.00385807	0.326595	0.0118996	6.72183e-08	0.00110322			3.26336e-14	1.25781e-13	4.67345e-13	1.67389e-12	5.77946e-12	1.92361e-11	6.17184e-11	1.9089e-10	5.6914e-10	1.63578e-09	4.53212e-09	1.21045e-08	3.11645e-08	7.7347e-08	1.85053e-07	4.26794e-07	9.48878e-07	2.03363e-06	4.20147e-06	8.36759e-06	1.60646e-05	2.97309e-05	5.30414e-05	9.12203e-05	0.00015123	0.000241687	0.000372338	0.000552957	0.000791616	0.00109246	0.00145335	0.00168287	0.00114561	0.000797904	0.000565164	0.000420563	0.000329795	0.00026774	0.00022062	0.00018235
240.8	0.0148612	21.7391	0.00530078	0.448724	0.0145505	9.64888e-08	0.0011663			3.26336e-14	1.25781e-13	4.67345e-13	1.67389e-12	5.77946e-12	1.92361e-11	6.17184e-11	1.9089e-10	5.6914e-10	1.63578e-09	4.53212e-09	1.21045e-08	3.11645e-08	7.7347e-08	1.85053e-07	4.26794e-07	9.48878e-07	2.03363e-06	4.20147e-06	8.36759e-06	1.60646e-05	2.97309e-05	5.30414e-05	9.12203e-05	0.00015123	0.000241687	0.000372338	0.000552957	0.000791616	0.00109246	0.00145335	0.00186381	0.00208043	0.00136523	0.000916622	0.000625869	0.000448961	0.000339383	0.000265601	0.000210975
242.6	0.0185879	23.0263	0.0054668	0.462778	0.0176976	7.92639e-07	0.0014126			3.26336e-14	1.25781e-13	4.67345e-13	1.67389e-12	5.77946e-12	1.92361e-11	6.17184e-11	1.9089e-10	5.6914e-10	1.63578e-09	4.53212e-09	1.21045e-08	3.11645e-08	7.7347e-08	1.85053e-07	4.26794e-07	9.48878e-07	2.03363e-06	4.20147e-06	8.36759e-06	1.60646e-05	2.97309e-05	5.30414e-05	9.12203e-05	0.00015123	0.000241687	0.000372338	0.000552957	0.000791616	0.00109246	0.00145335	0.00186381	0.0023041	0.00247926	0.00156836	0.00101508	0.00066813	0.000462015	0.000336672	0.00025399
244.4	0.0230643	24.4755	0.00581192	0.491994	0.0211208	3.7769e-06	0.00164925			3.26336e-14	1.25781e-13	4.67345e-13	1.67389e-12	5.77946e-12	1.92361e-11	6.17184e-11	1.9089e-10	5.6914e-10	1.63578e-09	4.53212e-09	1.21045e-08	3.11645e-08	7.7347e-08	1.85053e-07	4.26794e-07	9.48878e-07	2.03363e-06	4.20147e-06	8.36759e-06	1.60646e-05	2.97309e-05	5.30414e-05	9.12203e-05	0.00015123	0.000241687	0.000372338	0.000552957	0.000791616	0.00109246	0.00145335	0.00186381	0.0023041	0.00274581	0.00284814	0.00173681	0.00108362	0.000687556	0.000458324	0.000321953
246.2	0.0276586	26.1194	0.00523782	0.443395	0.0250421	6.84576e-06	0.00222855			3.26336e-14	1.25781e-13	4.67345e-13	1.67389e-12	5.77946e-12	1.92361e-11	6.17184e-11	1.9089e-10	5.6914e-10	1.63578e-09	4.53212e-09	1.21045e-08	3.11645e-08	7.7347e-08	1.85053e-07	4.26794e-07	9.48878e-07	2.03363e-06	4.20147e-06	8.36759e-06	1.60646e-05	2.97309e-05	5.30414e-05	9.12203e-05	0.00015123	0.000241687	0.000372338	0.000552957	0.000791616	0.00109246	0.00145335	0.00186381	0.0023041	0.00274581	0.00315435	0.00315406	0.00185409	0.00111513	0.000682063	0.000438287
248	0.0329786	28	0.00527784	0.446783	0.0318399	1.29676e-06	0.00603698			3.26336e-14	1.25781e-13	4.67345e-13	1.67389e-12	5.77946e-12	1.92361e-11	6.17184e-11	1.9089e-10	5.6914e-10	1.63578e-09	4.53212e-09	1.21045e-08	3.11645e-08	7.7347e-08	1.85053e-07	4.26794e-07	9.48878e-07	2.03363e-06	4.20147e-06	8.36759e-06	1.60646e-05	2.97309e-05	5.30414e-05	9.12203e-05	0.00015123	0.000241687	0.000372338	0.000552957	0.000791616	0.00109246	0.00145335	0.00186381	0.0023041	0.00274581	0.00315435	0.00349316	0.00336703	0.001908	0.00110622	0.000652245
249.8	0.0438861	30.1724	0.00931877	0.788858	0.0474697	1.28425e-05	0.0201378			3.26336e-14	1.25781e-13	4.67345e-13	1.67389e-12	5.77946e-12	1.92361e-11	6.17184e-11	1.9089e-10	5.6914e-10	1.63578e-09	4.53212e-09	1.21045e-08	3.11645e-08	7.7347e-08	1.85053e-07	4.26794e-07	9.48878e-07	2.03363e-06	4.20147e-06	8.36759e-06	1.60646e-05	2.97309e-05	5.30414e-05	9.12203e-05	0.00015123	0.000241687	0.000372338	0.000552957	0.000791616	0.00109246	0.00145335	0.00186381	0.0023041	0.00274581	0.00315435	0.00349316	0.00372904	0.00346493	0.00189276	0.00105785
251.6	0.0601368	32.7103	0.011813	1	0.0625977	6.05592e-06	0.0338044			3.26336e-14	1.25781e-13	4.67345e-13	1.67389e-12	5.77946e-12	1.92361e-11	6.17184e-11	1.9089e-10	5.6914e-10	1.63578e-09	4.53212e-09	1.21045e-08	3.11645e-08	7.7347e-08	1.85053e-07	4.26794e-07	9.48878e-07	2.03363e-06	4.20147e-06	8.36759e-06	1.60646e-05	2.97309e-05	5.30414e-05	9.12203e-05	0.00015123	0.000241687	0.000372338	0.000552957	0.000791616	0.00109246	0.00145335	0.00186381	0.0023041	0.00274581	0.00315435	0.00349316	0.00372904	0.00383746	0.00343725	0.00181001
253.4	0.0651352	35.7143	0.00304788	0.258011	0.0678956	7.61984e-06	0.0363021			3.26336e-14	1.25781e-13	4.67345e-13	1.67389e-12	5.77946e-12	1.92361e-11	6.17184e-11	1.9089e-10	5.6914e-10	1.63578e-09	4.53212e-09	1.21045e-08	3.11645e-08	7.7347e-08	1.85053e-07	4.26794e-07	9.48878e-07	2.03363e-06	4.20147e-06	8.36759e-06	1.60646e-05	2.97309e-05	5.30414e-05	9.12203e-05	0.00015123	0.000241687	0.000372338	0.000552957	0.000791616	0.00109246	0.00145335	0.00186381	0.0023041	0.00274581	0.00315435	0.00349316	0.00372904	0.00383746	0.0038068	0.00328698
255.2	0.0703856	39.3258	0.00264055	0.223529	0.073641	1.05978e-05	0.0396843			3.26336e-14	1.25781e-13	4.67345e-13	1.67389e-12	5.77946e-12	1.92361e-11	6.17184e-11	1.9089e-10	5.6914e-10	1.63578e-09	4.53212e-09	1.21045e-08	3.11645e-08	7.7347e-08	1.85053e-07	4.26794e-07	9.48878e-07	2.03363e-06	4.20147e-06	8.36759e-06	1.60646e-05	2.97309e-05	5.30414e-05	9.12203e-05	0.00015123	0.000241687	0.000372338	0.000552957	0.000791616	0.00109246	0.00145335	0.00186381	0.0023041	0.00274581	0.00315435	0.00349316	0.00372904	0.00383746	0.0038068	0.00364038
257	0.0773272	43.75	0.00282074	0.238783	0.0800169	7.23425e-06	0.0442285			3.26336e-14	1.25781e-13	4.67345e-13	1.67389e-12	5.77946e-12	1.92361e-11	6.17184e-11	1.9089e-10	5.6914e-10	1.63578e-09	4.53212e-09	1.21045e-08	3.11645e-08	7.7347e-08	1.85053e-07	4.26794e-07	9.48878e-07	2.03363e-06	4.20147e-06	8.36759e-06	1.60646e-05	2.97309e-05	5.30414e-05	9.12203e-05	0.00015123	0.000241687	0.000372338	0.000552957	0.000791616	0.00109246	0.00145335	0.00186381	0.0023041	0.00274581	0.00315435	0.00349316	0.00372904	0.00383746	0.0038068	0.00364038
258.8	0.0862183	49.2958	0.0028457	0.240896	0.087132	8.34873e-07	0.0500911			3.26336e-14	1.25781e-13	4.67345e-13	1.67389e-12	5.77946e-12	1.92361e-11	6.17184e-11	1.9089e-10	5.6914e-10	1.63578e-09	4.53212e-09	1.21045e-08	3.11645e-08	7.7347e-08	1.85053e-07	4.26794e-07	9.48878e-07	2.03363e-06	4.20147e-06	8.36759e-06	1.60646e-05	2.97309e-05	5.30414e-05	9.12203e-05	0.00015123	0.000241687	0.000372338	0.000552957	0.000791616	0.00109246	0.00145335	0.00186381	0.0023041	0.00274581	0.00315435	0.00349316	0.00372904	0.00383746	0.0038068	0.00364038
260.6	0.0967061	56.4516	0.00255969	0.216684	0.0955754	1.27833e-06	0.0579541			3.26336e-14	1.25781e-13	4.67345e-13	1.67389e-12	5.77946e-12	1.92361e-11	6.17184e-11	1.9089e-10	5.6914e-10	1.63578e-09	4.53212e-09	1.21045e-08	3.11645e-08	7.7347e-08	1.85053e-07	4.26794e-07	9.48878e-07	2.03363e-06	4.20147e-06	8.36759e-06	1.60646e-05	2.97309e-05	5.30414e-05	9.12203e-05	0.00015123	0.000241687	0.000372338	0.000552957	0.000791616	0.00109246	0.00145335	0.00186381	0.0023041	0.00274581	0.00315435	0.00349316	0.00372904	0.00383746	0.0038068	0.00364038
262.4	0.111576	66.0377	0.00265195	0.224495	0.107052	2.04666e-05	0.0697702			3.26336e-14	1.25781e-13	4.67345e-13	1.67389e-12	5.77946e-12	1.92361e-11	6.17184e-11	1.9089e-10	5.6914e-10	1.63578e-09	4.53212e-09	1.21045e-08	3.11645e-08	7.7347e-08	1.85053e-07	4.26794e-07	9.48878e-07	2.03363e-06	4.20147e-06	8.36759e-06	1.60646e-05	2.97309e-05	5.30414e-05	9.12203e-05	0.00015123	0.000241687	0.000372338	0.000552957	0.000791616	0.00109246	0.00145335	0.00186381	0.0023041	0.00274581	0.00315435	0.00349316	0.00372904	0.00383746	0.0038068	0.00364038
264.2	0.133417	79.5455	0.00268481	0.227276	0.124095	8.69011e-05	0.0884396			3.26336e-14	1.25781e-13	4.67345e-13	1.67389e-12	5.77946e-12	1.92361e-11	6.17184e-11	1.9089e-10	5.6914e-10	1.63578e-09	4.53212e-09	1.21045e-08	3.11645e-08	7.7347e-08	1.85053e-07	4.26794e-07	9.48878e-07	2.03363e-06	4.20147e-06	8.36759e-06	1.60646e-05	2.97309e-05	5.30414e-05	9.12203e-05	0.00015123	0.000241687	0.000372338	0.000552957	0.000791616	0.00109246	0.00145335	0.00186381	0.0023041	0.00274581	0.00315435	0.00349316	0.00372904	0.00383746	0.0038068	0.00364038
266	0.166791	100	0.00259574	0.219736	0.152287	0.000210372	0.120396			3.26336e-14	1.25781e-13	4.67345e-13	1.67389e-12	5.77946e-12	1.92361e-11	6.17184e-11	1.9089e-10	5.6914e-10	1.63578e-09	4.53212e-09	1.21045e-08	3.11645e-08	7.7347e-08	1.85053e-07	4.26794e-07	9.48878e-07	2.03363e-06	4.20147e-06	8.36759e-06	1.60646e-05	2.97309e-05	5.30414e-05	9.12203e-05	0.00015123	0.000241687	0.000372338	0.000552957	0.000791616	0.00109246	0.00145335	0.00186381	0.0023041	0.00274581	0.00315435	0.00349316	0.00372904	0.00383746	0.0038068	0.00364038
267.8	0.216133	134.615	0.00211779	0.179276	0.203307	0.000164509	0.17917			3.26336e-14	1.25781e-13	4.67345e-13	1.67389e-12	5.77946e-12	1.92361e-11	6.17184e-11	1.9089e-10	5.6914e-10	1.63578e-09	4.53212e-09	1.21045e-08	3.11645e-08	7.7347e-08	1.85053e-07	4.26794e-07	9.48878e-07	2.03363e-06	4.20147e-06	8.36759e-06	1.60646e-05	2.97309e-05	5.30414e-05	9.12203e-05	0.00015123	0.000241687	0.000372338	0.000552957	0.000791616	0.00109246	0.00145335	0.00186381	0.0023041	0.00274581	0.00315435	0.00349316	0.00372904	0.00383746	0.0038068	0.00364038
269.6	0.294062	205.882	0.00142993	0.121047	0.299401	2.85103e-05	0.290589			3.26336e-14	1.25781e-13	4.67345e-13	1.67389e-12	5.77946e-12	1.92361e-11	6.17184e-11	1.9089e-10	5.6914e-10	1.63578e-09	4.53212e-09	1.21045e-08	3.11645e-08	7.7347e-08	1.85053e-07	4.26794e-07	9.48878e-07	2.03363e-06	4.20147e-06	8.36759e-06	1.60646e-05	2.97309e-05	5.30414e-05	9.12203e-05	0.00015123	0.000241687	0.000372338	0.000552957	0.000791616	0.00109246	0.00145335	0.00186381	0.0023041	0.00274581	0.00315435	0.00349316	0.00372904	0.00383746	0.0038068	0.00364038
271.4	0.445976	437.5	0.000617305	0.0522564	0.477174	0.000973313	0.497204			3.26336e-14	1.25781e-13	4.67345e-13	1.67389e-12	5.77946e-12	1.92361e-11	6.17184e-11	1.9089e-10	5.6914e-10	1.63578e-09	4.53212e-09	1.21045e-08	3.11645e-08	7.7347e-08	1.85053e-07	4.26794e-07	9.48878e-07	2.03363e-06	4.20147e-06	8.36759e-06	1.60646e-05	2.97309e-05	5.30414e-05	9.12203e-05	0.00015123	0.000241687	0.000372338	0.000552957	0.000791616	0.00109246	0.00145335	0.00186381	0.0023041	0.00274581	0.00315435	0.00349316	0.00372904	0.00383746	0.0038068	0.00364038
273.2	0.739282	-3500	1.86226e-05	0.00157645	0.825954	0.00751198	0.902923			3.26336e-14	1.25781e-13	4.67345e-13	1.67389e-12	5.77946e-12	1.92361e-11	6.17184e-11	1.9089e-10	5.6914e-10	1.63578e-09	4.53212e-09	1.21045e-08	3.11645e-08	7.7347e-08	1.85053e-07	4.26794e-07	9.48878e-07	2.03363e-06	4.20147e-06	8.36759e-06	1.60646e-05	2.97309e-05	5.30414e-05	9.12203e-05	0.00015123	0.000241687	0.000372338	0.000552957	0.000791616	0.00109246	0.00145335	0.00186381	0.0023041	0.00274581	0.00315435	0.00349316	0.00372904	0.00383746	0.0038068	0.00364038
275	1	-350	0.00165535	0.14013	0.909399	0.00820853	1			3.26336e-14	1.25781e-13	4.67345e-13	1.67389e-12	5.77946e-12	1.92361e-11	6.17184e-11	1.9089e-10	5.6914e-10	1.63578e-09	4.53212e-09	1.21045e-08	3.11645e-08	7.7347e-08	1.85053e-07	4.26794e-07	9.48878e-07	2.03363e-06	4.20147e-06	8.36759e-06	1.60646e-05	2.97309e-05	5.30414e-05	9.12203e-05	0.00015123	0.000241687	0.000372338	0.000552957	0.000791616	0.00109246	0.00145335	0.00186381	0.0023041	0.00274581	0.00315435	0.00349316	0.00372904	0.00383746	0.0038068	0.00364038
[truncated: 11 more columns]
