# Supplementary material for: Melting of aqueous NaCl solutions in porous materials: shifted phase transition distribution (SIDI) approach for determining NMR cryoporometry pore size distributions
Source: Royal Society of Chemistry journal article supplement (doi:10.1039/d3cp04029a), 2023-12-27
Supplement: d3cp04029a2.xlsx [file d3cp04029a2.xlsx]

## Sheet: Sheet1
Add measurement temperatures both to column A and row 19; measured signal intensities to column B; and saline intensities to column E
Use solver to minimize Diffsqusum (orange box), by letting parameters in yellow box to vary
										Melting point distribution is assumed to be a sum of three Gaussian distrubutions
						Diffsqusum				A1	A2	A3	Amplitude
						0.00466849				1.63554	0.240023	0.0194597
										Tmp 1	Tmp 2	Tmp 3	Mean melting temperature
						k (KÅ)				275.358	265.83	231.841
						300				Sigma 1	Sigma 2	Sigma 3	Width of distribution
						T0 (K)				0.28406	0.338925	8.137
						273
							Mean pore diameter		Dm (Å)	31.4535
									D*PSDN	3.24146e-07	7.14535e-07	1.54367e-06	3.2684e-06	6.78201e-06	1.37919e-05	2.74874e-05	5.36881e-05	0.000102768	0.000192785	0.000354419	0.00063854	0.00112741	0.00195074	0.00330776	0.00549644	0.00895036	0.0142826	0.0223344	0.0342248	0.0513928	0.0756228	0.10904	0.154064	0.213299	0.289365	0.384648	0.500998	0.639376	0.7995	0.979519	1.1758	1.38283	1.59334	1.79865	1.98916	2.15509	2.28729	2.37807	2.42193
							Pore diameter		D (Å)	6.81818	6.90846	7.00117	7.09639	7.19424	7.29483	7.39827	7.50469	7.61421	7.72698	7.84314	7.96284	8.08625	8.21355	8.34492	8.48057	8.62069	8.76552	8.9153	9.07029	9.23077	9.39702	9.56938	9.74817	9.93377	10.1266	10.327	10.5356	10.7527	10.979	11.215	11.4613	11.7187	11.988	12.2699	12.5654	12.8755	13.2013	13.544	13.905
					Max	0.0379422	Pore size distribution		PSD	1.80382e-09	3.92432e-09	8.36579e-09	1.74751e-08	3.57681e-08	7.17352e-08	1.40969e-07	2.71436e-07	5.12102e-07	9.46641e-07	1.71455e-06	3.04258e-06	5.29003e-06	9.01136e-06	1.50395e-05	2.45912e-05	3.93931e-05	6.1823e-05	9.50518e-05	0.000143167	0.000211245	0.000305341	0.000432341	0.000599654	0.000814699	0.00108419	0.00141322	0.00180426	0.00225612	0.00276299	0.00331389	0.00389242	0.00447722	0.00504294	0.00556193	0.00600638	0.00635069	0.00657394	0.00666192	0.00660865
					Sum	4.07102	Normalized PSD		PSDN	4.75414e-08	1.03429e-07	2.20488e-07	4.60571e-07	9.427e-07	1.89065e-06	3.71537e-06	7.15394e-06	1.34969e-05	2.49496e-05	4.51884e-05	8.01899e-05	0.000139423	0.000237503	0.000396379	0.000648122	0.00103824	0.0016294	0.00250518	0.00377329	0.00556756	0.00804753	0.0113947	0.0158044	0.0214721	0.0285748	0.0372467	0.047553	0.059462	0.0728211	0.0873405	0.102588	0.118001	0.132911	0.14659	0.158304	0.167378	0.173262	0.175581	0.174177
							Sum D1	0.770211	MP D1	0	0	0	0	0	0	0	0	0	0	0	0	0	0	0	0	0	0	0	0	0	0	0	0	0	0	0	0	0	0	0	0	0	0	0	0	0	0	0	0
Tstep			Max				Sum D2	0.219764	MP D2	0	0	0	0	0	0	0	0	0	0	0	0	0	0	0	0	0	0	0	0	0	0	0	0	0	0	0	0	0	0	0	0	0	0	0	0	0	0	0	0
1.15			0.018195				Sum D3	0.0194597	MP D3	6.98795e-11	1.56079e-10	3.41717e-10	7.33353e-10	1.54271e-09	3.18113e-09	6.4299e-09	1.27395e-08	2.47414e-08	4.71003e-08	8.78916e-08	1.60767e-07	2.88251e-07	5.06607e-07	8.72764e-07	1.47383e-06	2.43963e-06	3.95845e-06	6.29581e-06	9.8153e-06	1.49997e-05	2.2469e-05	3.29923e-05	4.7486e-05	6.69954e-05	9.26508e-05	0.000125597	0.000166891	0.000217377	0.000277536	0.000347337	0.000426096	0.000512377	0.000603944	0.000697797	0.000790291	0.000877345	0.000954727	0.00101839	0.00106481
			Conventional						MP Dtot	6.98795e-11	1.56079e-10	3.41717e-10	7.33353e-10	1.54271e-09	3.18113e-09	6.4299e-09	1.27395e-08	2.47414e-08	4.71003e-08	8.78916e-08	1.60767e-07	2.88251e-07	5.06607e-07	8.72764e-07	1.47383e-06	2.43963e-06	3.95845e-06	6.29581e-06	9.8153e-06	1.49997e-05	2.2469e-05	3.29923e-05	4.7486e-05	6.69954e-05	9.26508e-05	0.000125597	0.000166891	0.000217377	0.000277536	0.000347337	0.000426096	0.000512377	0.000603944	0.000697797	0.000790291	0.000877345	0.000954727	0.00101839	0.00106481
T (K)	Meas	D (Å)	PSD	PSDN	Fit	Diffsqu	Saline		T (K)	185	186.15	187.3	188.45	189.6	190.75	191.9	193.05	194.2	195.35	196.5	197.65	198.8	199.95	201.1	202.25	203.4	204.55	205.7	206.85	208	209.15	210.3	211.45	212.6	213.75	214.9	216.05	217.2	218.35	219.5	220.65	221.8	222.95	224.1	225.25	226.4	227.55	228.7	229.85
185	0.00193191	6.81818			0.00095814	9.48237e-07	0.000916993			6.885e-11	1.56079e-10	3.0527e-10	4.1322e-10	6.27189e-10	9.32672e-10	1.38502e-09	2.05663e-09	3.09129e-09	4.69112e-09	7.16674e-09	1.10188e-08	1.70098e-08	2.62145e-08	4.03133e-08	6.18901e-08	9.40734e-08	1.41464e-07	2.10414e-07	3.08942e-07	4.46984e-07	5.95203e-07	5.59692e-07	2.17089e-07	1.47319e-07	1.76283e-07	2.23519e-07	2.87246e-07	3.66717e-07	4.51967e-07	5.60557e-07	6.6902e-07	7.96867e-07	9.22281e-07	1.04788e-06	1.16906e-06	1.28598e-06	1.3787e-06	1.45704e-06	1.48265e-06
186.15	0.00194823	6.90846	0.000356804	0.01961	0.000972072	9.52891e-07	0.000927856			6.98795e-11	1.5378e-10	3.41717e-10	6.55135e-10	8.69267e-10	1.29329e-09	1.88517e-09	2.74413e-09	3.99419e-09	5.88489e-09	8.75387e-09	1.3109e-08	1.97565e-08	2.9895e-08	4.51614e-08	6.80768e-08	1.02446e-07	1.5264e-07	2.24995e-07	3.2804e-07	4.72123e-07	6.69568e-07	8.73963e-07	8.05569e-07	3.06279e-07	2.03733e-07	2.38968e-07	2.97009e-07	3.7414e-07	4.68206e-07	5.65637e-07	6.87664e-07	8.04491e-07	9.39275e-07	1.0656e-06	1.18678e-06	1.29783e-06	1.3994e-06	1.47063e-06	1.52346e-06
187.3	0.00197015	7.00117	0.000466462	0.0256368	0.000988645	9.63342e-07	0.000944597			6.98795e-11	1.56079e-10	3.36683e-10	7.33353e-10	1.37817e-09	1.79246e-09	2.61408e-09	3.73507e-09	5.3294e-09	7.60374e-09	1.09815e-08	1.60121e-08	2.35042e-08	3.47225e-08	5.1502e-08	7.62637e-08	1.12687e-07	1.66226e-07	2.4277e-07	3.50773e-07	5.01308e-07	7.07226e-07	9.83158e-07	1.2579e-06	1.13653e-06	4.23566e-07	2.76179e-07	3.17538e-07	3.86856e-07	4.77683e-07	5.8596e-07	6.93896e-07	8.2691e-07	9.48262e-07	1.08524e-06	1.20685e-06	1.31751e-06	1.4123e-06	1.49271e-06	1.53767e-06
188.45	0.00201458	7.09639	0.000920666	0.0505999	0.00099773	1.03398e-06	0.000951005			6.98795e-11	1.56079e-10	3.41717e-10	7.22549e-10	1.54271e-09	2.84184e-09	3.62303e-09	5.17924e-09	7.25391e-09	1.01456e-08	1.4189e-08	2.00868e-08	2.87094e-08	4.1309e-08	5.98186e-08	8.6971e-08	1.26239e-07	1.82842e-07	2.64378e-07	3.78484e-07	5.36048e-07	7.50943e-07	1.03845e-06	1.41507e-06	1.7747e-06	1.57176e-06	5.74184e-07	3.66983e-07	4.13595e-07	4.93918e-07	5.97821e-07	7.18828e-07	8.34404e-07	9.74687e-07	1.09562e-06	1.22909e-06	1.33979e-06	1.43372e-06	1.50647e-06	1.56076e-06
189.6	0.00203972	7.19424	0.000506917	0.0278602	0.00100972	1.06091e-06	0.000957435			6.98795e-11	1.56079e-10	3.41717e-10	7.33353e-10	1.51998e-09	3.18113e-09	5.7441e-09	7.17828e-09	1.00586e-08	1.38093e-08	1.89322e-08	2.59538e-08	3.60152e-08	5.04573e-08	7.11657e-08	1.01015e-07	1.43963e-07	2.04831e-07	2.90806e-07	4.12171e-07	5.78395e-07	8.02983e-07	1.10264e-06	1.49465e-06	1.99644e-06	2.45431e-06	2.13067e-06	7.62967e-07	4.77999e-07	5.28058e-07	6.18139e-07	7.33377e-07	8.64384e-07	9.83521e-07	1.12615e-06	1.24085e-06	1.36448e-06	1.45796e-06	1.52931e-06	1.57515e-06
190.75	0.00205343	7.29483	0.000268922	0.01478	0.00102656	1.05448e-06	0.000971953			6.98795e-11	1.56079e-10	3.41717e-10	7.33353e-10	1.54271e-09	3.13427e-09	6.4299e-09	1.13807e-08	1.3941e-08	1.91486e-08	2.57688e-08	3.46298e-08	4.65345e-08	6.32975e-08	8.69259e-08	1.20177e-07	1.6721e-07	2.33589e-07	3.25778e-07	4.53373e-07	6.29876e-07	8.66418e-07	1.17906e-06	1.58704e-06	2.10872e-06	2.76096e-06	3.32705e-06	2.8312e-06	9.93771e-07	6.10285e-07	6.60865e-07	7.58303e-07	8.8188e-07	1.01886e-06	1.13636e-06	1.27543e-06	1.37753e-06	1.48483e-06	1.55518e-06	1.59903e-06
191.9	0.00208723	7.39827	0.000644223	0.0354065	0.00103883	1.09914e-06	0.000975278			6.98795e-11	1.56079e-10	3.41717e-10	7.33353e-10	1.54271e-09	3.18113e-09	6.33517e-09	1.27395e-08	2.21026e-08	2.65395e-08	3.57323e-08	4.71351e-08	6.20904e-08	8.17853e-08	1.09046e-07	1.46791e-07	1.98929e-07	2.71309e-07	3.71517e-07	5.07895e-07	6.92841e-07	9.43535e-07	1.2722e-06	1.69702e-06	2.23907e-06	2.91624e-06	3.74274e-06	4.42094e-06	3.68766e-06	1.2688e-06	7.63772e-07	8.10717e-07	9.11853e-07	1.03948e-06	1.17719e-06	1.28699e-06	1.41592e-06	1.49903e-06	1.58383e-06	1.62607e-06
193.05	0.00211208	7.50469	0.000460398	0.0253035	0.00106126	1.10421e-06	0.000989139			6.98795e-11	1.56079e-10	3.41717e-10	7.33353e-10	1.54271e-09	3.18113e-09	6.4299e-09	1.25518e-08	2.47414e-08	4.20767e-08	4.9524e-08	6.53598e-08	8.4512e-08	1.09125e-07	1.40897e-07	1.84146e-07	2.42983e-07	3.22774e-07	4.3151e-07	5.79203e-07	7.76161e-07	1.03785e-06	1.38543e-06	1.83109e-06	2.39424e-06	3.09651e-06	3.95324e-06	4.9733e-06	5.75831e-06	4.70822e-06	1.5879e-06	9.36958e-07	9.7488e-07	1.07481e-06	1.20102e-06	1.33323e-06	1.42875e-06	1.54081e-06	1.59899e-06	1.65603e-06
194.2	0.0021457	7.61421	0.000605146	0.0332588	0.00108148	1.13256e-06	0.000997818			6.98795e-11	1.56079e-10	3.41717e-10	7.33353e-10	1.54271e-09	3.18113e-09	6.4299e-09	1.27395e-08	2.43769e-08	4.71003e-08	7.85173e-08	9.05868e-08	1.17189e-07	1.48532e-07	1.87996e-07	2.37931e-07	3.04816e-07	3.94255e-07	5.13364e-07	6.72734e-07	8.85133e-07	1.16267e-06	1.52393e-06	1.99407e-06	2.58338e-06	3.31109e-06	4.19761e-06	5.25301e-06	6.47776e-06	7.35192e-06	5.89235e-06	1.94796e-06	1.12668e-06	1.1491e-06	1.24184e-06	1.36021e-06	1.48009e-06	1.55477e-06	1.64355e-06	1.67188e-06
195.35	0.00216777	7.72698	0.00038578	0.0212025	0.0011031	1.13352e-06	0.00100341			6.98795e-11	1.56079e-10	3.41717e-10	7.33353e-10	1.54271e-09	3.18113e-09	6.4299e-09	1.27395e-08	2.47414e-08	4.64064e-08	8.78916e-08	1.4362e-07	1.6242e-07	2.05961e-07	2.55884e-07	3.17468e-07	3.93847e-07	4.94584e-07	6.27053e-07	8.00346e-07	1.02807e-06	1.3259e-06	1.70719e-06	2.1934e-06	2.81332e-06	3.57267e-06	4.4885e-06	5.57772e-06	6.84208e-06	8.27048e-06	9.20094e-06	7.22844e-06	2.3424e-06	1.32803e-06	1.32767e-06	1.40644e-06	1.51005e-06	1.61063e-06	1.65844e-06	1.71847e-06
196.5	0.00218038	7.84314	0.000213887	0.0117552	0.00113328	1.09642e-06	0.00101701			6.98795e-11	1.56079e-10	3.41717e-10	7.33353e-10	1.54271e-09	3.18113e-09	6.4299e-09	1.27395e-08	2.47414e-08	4.71003e-08	8.65967e-08	1.60767e-07	2.57507e-07	2.85456e-07	3.54822e-07	4.3211e-07	5.25505e-07	6.39041e-07	7.86623e-07	9.77589e-07	1.22308e-06	1.54001e-06	1.94688e-06	2.45718e-06	3.09455e-06	3.89066e-06	4.84309e-06	5.96425e-06	7.26503e-06	8.73563e-06	1.03505e-05	1.12873e-05	8.69214e-06	2.76102e-06	1.53441e-06	1.50366e-06	1.56137e-06	1.64323e-06	1.71803e-06	1.73404e-06
197.65	0.00222442	7.96284	0.000724751	0.0398323	0.00116746	1.11717e-06	0.00103228			6.98795e-11	1.56079e-10	3.41717e-10	7.33353e-10	1.54271e-09	3.18113e-09	6.4299e-09	1.27395e-08	2.47414e-08	4.71003e-08	8.78916e-08	1.58398e-07	2.88251e-07	4.52573e-07	4.91773e-07	5.99185e-07	7.15271e-07	8.52664e-07	1.01638e-06	1.22636e-06	1.49394e-06	1.83214e-06	2.26127e-06	2.80216e-06	3.46669e-06	4.27958e-06	5.27415e-06	6.43543e-06	7.76849e-06	9.27562e-06	1.09326e-05	1.26975e-05	1.35728e-05	1.02455e-05	3.19008e-06	1.7378e-06	1.66929e-06	1.69908e-06	1.7528e-06	1.79635e-06
198.8	0.00225499	8.08625	0.000487864	0.026813	0.00120122	1.11043e-06	0.00103677			6.98795e-11	1.56079e-10	3.41717e-10	7.33353e-10	1.54271e-09	3.18113e-09	6.4299e-09	1.27395e-08	2.47414e-08	4.71003e-08	8.78916e-08	1.60767e-07	2.84005e-07	5.06607e-07	7.79676e-07	8.30454e-07	9.9183e-07	1.16057e-06	1.35614e-06	1.58456e-06	1.87411e-06	2.23788e-06	2.69021e-06	3.25466e-06	3.95341e-06	4.79424e-06	5.80138e-06	7.00822e-06	8.38219e-06	9.91841e-06	1.16085e-05	1.34116e-05	1.52686e-05	1.59984e-05	1.18377e-05	3.61293e-06	1.92923e-06	1.81652e-06	1.81238e-06	1.8327e-06
199.95	0.00229252	8.21355	0.000580535	0.0319062	0.00124439	1.09858e-06	0.00104438			6.98795e-11	1.56079e-10	3.41717e-10	7.33353e-10	1.54271e-09	3.18113e-09	6.4299e-09	1.27395e-08	2.47414e-08	4.71003e-08	8.78916e-08	1.60767e-07	2.88251e-07	4.99143e-07	8.72764e-07	1.31663e-06	1.37465e-06	1.60931e-06	1.84586e-06	2.11425e-06	2.4215e-06	2.80737e-06	3.28598e-06	3.87204e-06	4.59181e-06	5.46735e-06	6.49904e-06	7.70879e-06	9.12826e-06	1.0702e-05	1.24129e-05	1.42407e-05	1.61274e-05	1.79973e-05	1.84846e-05	1.34068e-05	4.01091e-06	2.09938e-06	1.93765e-06	1.89499e-06
201.1	0.00233757	8.34492	0.000674921	0.0370937	0.00129307	1.09098e-06	0.0010558			6.98795e-11	1.56079e-10	3.41717e-10	7.33353e-10	1.54271e-09	3.18113e-09	6.4299e-09	1.27395e-08	2.47414e-08	4.71003e-08	8.78916e-08	1.60767e-07	2.88251e-07	5.06607e-07	8.59905e-07	1.47383e-06	2.17942e-06	2.23045e-06	2.55956e-06	2.87774e-06	3.23098e-06	3.62734e-06	4.12218e-06	4.72954e-06	5.46284e-06	6.35022e-06	7.4115e-06	8.63584e-06	1.00408e-05	1.16545e-05	1.33935e-05	1.52275e-05	1.71243e-05	1.90095e-05	2.07941e-05	2.09348e-05	1.48836e-05	4.36467e-06	2.23937e-06	2.02598e-06
202.25	0.00236242	8.48057	0.000360561	0.0198164	0.00134893	1.02715e-06	0.00105956			6.98795e-11	1.56079e-10	3.41717e-10	7.33353e-10	1.54271e-09	3.18113e-09	6.4299e-09	1.27395e-08	2.47414e-08	4.71003e-08	8.78916e-08	1.60767e-07	2.88251e-07	5.06607e-07	8.72764e-07	1.45212e-06	2.43963e-06	3.53625e-06	3.54748e-06	3.99041e-06	4.39773e-06	4.83991e-06	5.32618e-06	5.93309e-06	6.67264e-06	7.5548e-06	8.60832e-06	9.8483e-06	1.12482e-05	1.28195e-05	1.45856e-05	1.64305e-05	1.8311e-05	2.01846e-05	2.19636e-05	2.35504e-05	2.32408e-05	1.61963e-05	4.6557e-06	2.34145e-06
203.4	0.00243992	8.62069	0.00108827	0.0598116	0.00141913	1.04202e-06	0.00107819			6.98795e-11	1.56079e-10	3.41717e-10	7.33353e-10	1.54271e-09	3.18113e-09	6.4299e-09	1.27395e-08	2.47414e-08	4.71003e-08	8.78916e-08	1.60767e-07	2.88251e-07	5.06607e-07	8.72764e-07	1.47383e-06	2.40368e-06	3.95845e-06	5.62431e-06	5.5306e-06	6.09811e-06	6.58766e-06	7.10666e-06	7.66602e-06	8.37066e-06	9.22788e-06	1.02412e-05	1.14386e-05	1.28275e-05	1.43612e-05	1.60437e-05	1.78929e-05	1.97575e-05	2.15834e-05	2.33213e-05	2.48749e-05	2.61446e-05	2.52907e-05	1.72763e-05	4.86794e-06
204.55	0.00248222	8.76552	0.000574459	0.0315723	0.00149841	9.67895e-07	0.00109026			6.98795e-11	1.56079e-10	3.41717e-10	7.33353e-10	1.54271e-09	3.18113e-09	6.4299e-09	1.27395e-08	2.47414e-08	4.71003e-08	8.78916e-08	1.60767e-07	2.88251e-07	5.06607e-07	8.72764e-07	1.47383e-06	2.43963e-06	3.90013e-06	6.29581e-06	8.76842e-06	8.45181e-06	9.13478e-06	9.67296e-06	1.02287e-05	1.08156e-05	1.15761e-05	1.25093e-05	1.36084e-05	1.48989e-05	1.63775e-05	1.79731e-05	1.96816e-05	2.15161e-05	2.32884e-05	2.49374e-05	2.64126e-05	2.7615e-05	2.84505e-05	2.6977e-05	1.80638e-05
205.7	0.00255313	8.9153	0.000930957	0.0511654	0.00158919	9.29189e-07	0.00109695			6.98795e-11	1.56079e-10	3.41717e-10	7.33353e-10	1.54271e-09	3.18113e-09	6.4299e-09	1.27395e-08	2.47414e-08	4.71003e-08	8.78916e-08	1.60767e-07	2.88251e-07	5.06607e-07	8.72764e-07	1.47383e-06	2.43963e-06	3.95845e-06	6.20305e-06	9.8153e-06	1.33998e-05	1.26605e-05	1.3413e-05	1.39224e-05	1.44311e-05	1.49573e-05	1.56926e-05	1.66221e-05	1.77251e-05	1.90221e-05	2.04964e-05	2.20485e-05	2.36669e-05	2.53612e-05	2.69075e-05	2.82429e-05	2.9322e-05	3.00506e-05	3.03476e-05	2.82068e-05
206.85	0.00265866	9.07029	0.00133842	0.0735594	0.00169807	9.22728e-07	0.00110399			6.98795e-11	1.56079e-10	3.41717e-10	7.33353e-10	1.54271e-09	3.18113e-09	6.4299e-09	1.27395e-08	2.47414e-08	4.71003e-08	8.78916e-08	1.60767e-07	2.88251e-07	5.06607e-07	8.72764e-07	1.47383e-06	2.43963e-06	3.95845e-06	6.29581e-06	9.6707e-06	1.49997e-05	2.00725e-05	1.85901e-05	1.93054e-05	1.96423e-05	1.99573e-05	2.0276e-05	2.08521e-05	2.16505e-05	2.26305e-05	2.38062e-05	2.5144e-05	2.65131e-05	2.78965e-05	2.93024e-05	3.04741e-05	3.1354e-05	3.19082e-05	3.20544e-05	3.1731e-05
208	0.00275737	9.23077	0.00120886	0.0664388	0.0018293	8.61311e-07	0.00111475			6.98795e-11	1.56079e-10	3.41717e-10	7.33353e-10	1.54271e-09	3.18113e-09	6.4299e-09	1.27395e-08	2.47414e-08	4.71003e-08	8.78916e-08	1.60767e-07	2.88251e-07	5.06607e-07	8.72764e-07	1.47383e-06	2.43963e-06	3.95845e-06	6.29581e-06	9.8153e-06	1.47787e-05	2.2469e-05	2.94734e-05	2.67568e-05	2.7237e-05	2.71642e-05	2.7054e-05	2.69425e-05	2.716e-05	2.76422e-05	2.83221e-05	2.92043e-05	3.02355e-05	3.12513e-05	3.22316e-05	3.31865e-05	3.38309e-05	3.41194e-05	3.40358e-05	3.35156e-05
209.15	0.0028982	9.39702	0.00166422	0.0914656	0.00198573	8.32603e-07	0.00112739			6.98795e-11	1.56079e-10	3.41717e-10	7.33353e-10	1.54271e-09	3.18113e-09	6.4299e-09	1.27395e-08	2.47414e-08	4.71003e-08	8.78916e-08	1.60767e-07	2.88251e-07	5.06607e-07	8.72764e-07	1.47383e-06	2.43963e-06	3.95845e-06	6.29581e-06	9.8153e-06	1.49997e-05	2.2138e-05	3.29923e-05	4.24213e-05	3.77497e-05	3.76672e-05	3.68236e-05	3.5949e-05	3.50928e-05	3.46765e-05	3.45943e-05	3.47441e-05	3.51179e-05	3.56389e-05	3.61077e-05	3.65039e-05	3.68421e-05	3.68148e-05	3.63945e-05	3.55874e-05
210.3	0.00305413	9.56938	0.00177683	0.0976544	0.00217259	7.77122e-07	0.00114526			6.98795e-11	1.56079e-10	3.41717e-10	7.33353e-10	1.54271e-09	3.18113e-09	6.4299e-09	1.27395e-08	2.47414e-08	4.71003e-08	8.78916e-08	1.60767e-07	2.88251e-07	5.06607e-07	8.72764e-07	1.47383e-06	2.43963e-06	3.95845e-06	6.29581e-06	9.8153e-06	1.49997e-05	2.2469e-05	3.25062e-05	4.7486e-05	5.98498e-05	5.22057e-05	5.10614e-05	4.89307e-05	4.68239e-05	4.48047e-05	4.33976e-05	4.24385e-05	4.17795e-05	4.13939e-05	4.11772e-05	4.08938e-05	4.0525e-05	4.00916e-05	3.92696e-05	3.80535e-05
211.45	0.00327134	9.74817	0.00238513	0.131087	0.00239261	7.72164e-07	0.00115212			6.98795e-11	1.56079e-10	3.41717e-10	7.33353e-10	1.54271e-09	3.18113e-09	6.4299e-09	1.27395e-08	2.47414e-08	4.71003e-08	8.78916e-08	1.60767e-07	2.88251e-07	5.06607e-07	8.72764e-07	1.47383e-06	2.43963e-06	3.95845e-06	6.29581e-06	9.8153e-06	1.49997e-05	2.2469e-05	3.29923e-05	4.67864e-05	6.69954e-05	8.27688e-05	7.07697e-05	6.78497e-05	6.37326e-05	5.97824e-05	5.60732e-05	5.32381e-05	5.1032e-05	4.9246e-05	4.78265e-05	4.66353e-05	4.53985e-05	4.40993e-05	4.27649e-05	4.10597e-05
212.6	0.00350203	9.93377	0.00243935	0.134067	0.00265575	7.16191e-07	0.00116503			6.98795e-11	1.56079e-10	3.41717e-10	7.33353e-10	1.54271e-09	3.18113e-09	6.4299e-09	1.27395e-08	2.47414e-08	4.71003e-08	8.78916e-08	1.60767e-07	2.88251e-07	5.06607e-07	8.72764e-07	1.47383e-06	2.43963e-06	3.95845e-06	6.29581e-06	9.8153e-06	1.49997e-05	2.2469e-05	3.29923e-05	4.7486e-05	6.60084e-05	9.26508e-05	0.000112201	9.40378e-05	8.83748e-05	8.13706e-05	7.48177e-05	6.87878e-05	6.40184e-05	6.01519e-05	5.68988e-05	5.4166e-05	5.17724e-05	4.94026e-05	4.70398e-05	4.47143e-05
213.75	0.00377845	10.1266	0.00281278	0.15459	0.0029627	6.65452e-07	0.00116387			6.98795e-11	1.56079e-10	3.41717e-10	7.33353e-10	1.54271e-09	3.18113e-09	6.4299e-09	1.27395e-08	2.47414e-08	4.71003e-08	8.78916e-08	1.60767e-07	2.88251e-07	5.06607e-07	8.72764e-07	1.47383e-06	2.43963e-06	3.95845e-06	6.29581e-06	9.8153e-06	1.49997e-05	2.2469e-05	3.29923e-05	4.7486e-05	6.69954e-05	9.12858e-05	0.000125597	0.000149091	0.000122485	0.000112832	0.000101835	9.17827e-05	8.27167e-05	7.54591e-05	6.94996e-05	6.44408e-05	6.01326e-05	5.63387e-05	5.26968e-05	4.91841e-05
214.9	0.00409503	10.327	0.00309754	0.170241	0.00333227	5.81802e-07	0.00117655			6.98795e-11	1.56079e-10	3.41717e-10	7.33353e-10	1.54271e-09	3.18113e-09	6.4299e-09	1.27395e-08	2.47414e-08	4.71003e-08	8.78916e-08	1.60767e-07	2.88251e-07	5.06607e-07	8.72764e-07	1.47383e-06	2.43963e-06	3.95845e-06	6.29581e-06	9.8153e-06	1.49997e-05	2.2469e-05	3.29923e-05	4.7486e-05	6.69954e-05	9.26508e-05	0.000123747	0.000166891	0.000194192	0.000156383	0.00014121	0.000124927	0.000110368	9.74991e-05	8.71855e-05	7.87118e-05	7.15393e-05	6.54363e-05	6.00953e-05	5.5099e-05
216.05	0.00445172	10.5356	0.00335321	0.184292	0.00376849	4.66807e-07	0.00119248			6.98795e-11	1.56079e-10	3.41717e-10	7.33353e-10	1.54271e-09	3.18113e-09	6.4299e-09	1.27395e-08	2.47414e-08	4.71003e-08	8.78916e-08	1.60767e-07	2.88251e-07	5.06607e-07	8.72764e-07	1.47383e-06	2.43963e-06	3.95845e-06	6.29581e-06	9.8153e-06	1.49997e-05	2.2469e-05	3.29923e-05	4.7486e-05	6.69954e-05	9.26508e-05	0.000125597	0.000164433	0.000217377	0.000247935	0.000195713	0.000173229	0.000150223	0.000130092	0.000112651	9.87421e-05	8.73823e-05	7.7849e-05	6.97996e-05	6.28348e-05
217.2	0.00489202	10.7527	0.00397374	0.218397	0.0042766	3.78751e-07	0.00121086			6.98795e-11	1.56079e-10	3.41717e-10	7.33353e-10	1.54271e-09	3.18113e-09	6.4299e-09	1.27395e-08	2.47414e-08	4.71003e-08	8.78916e-08	1.60767e-07	2.88251e-07	5.06607e-07	8.72764e-07	1.47383e-06	2.43963e-06	3.95845e-06	6.29581e-06	9.8153e-06	1.49997e-05	2.2469e-05	3.29923e-05	4.7486e-05	6.69954e-05	9.26508e-05	0.000125597	0.000166891	0.000214175	0.000277536	0.000310291	0.000240091	0.000208307	0.00017707	0.000150308	0.000127583	0.000109619	9.50894e-05	8.304e-05	7.29814e-05
218.35	0.00536758	10.979	0.00411682	0.22626	0.0048531	2.64684e-07	0.00122669			6.98795e-11	1.56079e-10	3.41717e-10	7.33353e-10	1.54271e-09	3.18113e-09	6.4299e-09	1.27395e-08	2.47414e-08	4.71003e-08	8.78916e-08	1.60767e-07	2.88251e-07	5.06607e-07	8.72764e-07	1.47383e-06	2.43963e-06	3.95845e-06	6.29581e-06	9.8153e-06	1.49997e-05	2.2469e-05	3.29923e-05	4.7486e-05	6.69954e-05	9.26508e-05	0.000125597	0.000166891	0.000217377	0.000273448	0.000347337	0.00038065	0.000288707	0.000245533	0.000204586	0.000170232	0.000141636	0.000119287	0.00010143	8.68254e-05
219.5	0.00589115	11.215	0.00434372	0.238731	0.00550283	1.50793e-07	0.00123515			6.98795e-11	1.56079e-10	3.41717e-10	7.33353e-10	1.54271e-09	3.18113e-09	6.4299e-09	1.27395e-08	2.47414e-08	4.71003e-08	8.78916e-08	1.60767e-07	2.88251e-07	5.06607e-07	8.72764e-07	1.47383e-06	2.43963e-06	3.95845e-06	6.29581e-06	9.8153e-06	1.49997e-05	2.2469e-05	3.29923e-05	4.7486e-05	6.69954e-05	9.26508e-05	0.000125597	0.000166891	0.000217377	0.000277536	0.00034222	0.000426096	0.000457728	0.000340303	0.00028369	0.000231705	0.000188983	0.000154129	0.000127241	0.000106054
220.65	0.00647964	11.4613	0.00467476	0.256925	0.00622316	6.57853e-08	0.00124164			6.98795e-11	1.56079e-10	3.41717e-10	7.33353e-10	1.54271e-09	3.18113e-09	6.4299e-09	1.27395e-08	2.47414e-08	4.71003e-08	8.78916e-08	1.60767e-07	2.88251e-07	5.06607e-07	8.72764e-07	1.47383e-06	2.43963e-06	3.95845e-06	6.29581e-06	9.8153e-06	1.49997e-05	2.2469e-05	3.29923e-05	4.7486e-05	6.69954e-05	9.26508e-05	0.000125597	0.000166891	0.000217377	0.000277536	0.000347337	0.000419819	0.000512377	0.000539529	0.000393186	0.000321293	0.000257228	0.000205652	0.000164406	0.000133042
221.8	0.00706816	11.7187	0.00447173	0.245766	0.00703158	1.3379e-09	0.00126218			6.98795e-11	1.56079e-10	3.41717e-10	7.33353e-10	1.54271e-09	3.18113e-09	6.4299e-09	1.27395e-08	2.47414e-08	4.71003e-08	8.78916e-08	1.60767e-07	2.88251e-07	5.06607e-07	8.72764e-07	1.47383e-06	2.43963e-06	3.95845e-06	6.29581e-06	9.8153e-06	1.49997e-05	2.2469e-05	3.29923e-05	4.7486e-05	6.69954e-05	9.26508e-05	0.000125597	0.000166891	0.000217377	0.000277536	0.000347337	0.000426096	0.000504828	0.000603944	0.000623372	0.000445303	0.000356685	0.000279915	0.000219365	0.0001719
222.95	0.00770491	11.988	0.00462337	0.2541	0.00790091	3.84182e-08	0.00128036			6.98795e-11	1.56079e-10	3.41717e-10	7.33353e-10	1.54271e-09	3.18113e-09	6.4299e-09	1.27395e-08	2.47414e-08	4.71003e-08	8.78916e-08	1.60767e-07	2.88251e-07	5.06607e-07	8.72764e-07	1.47383e-06	2.43963e-06	3.95845e-06	6.29581e-06	9.8153e-06	1.49997e-05	2.2469e-05	3.29923e-05	4.7486e-05	6.69954e-05	9.26508e-05	0.000125597	0.000166891	0.000217377	0.000277536	0.000347337	0.000426096	0.000512377	0.000595046	0.000697797	0.000706	0.000494355	0.000388144	0.00029858	0.000229364
224.1	0.00840847	12.2699	0.00487644	0.268009	0.00882751	1.75593e-07	0.00130059			6.98795e-11	1.56079e-10	3.41717e-10	7.33353e-10	1.54271e-09	3.18113e-09	6.4299e-09	1.27395e-08	2.47414e-08	4.71003e-08	8.78916e-08	1.60767e-07	2.88251e-07	5.06607e-07	8.72764e-07	1.47383e-06	2.43963e-06	3.95845e-06	6.29581e-06	9.8153e-06	1.49997e-05	2.2469e-05	3.29923e-05	4.7486e-05	6.69954e-05	9.26508e-05	0.000125597	0.000166891	0.000217377	0.000277536	0.000347337	0.000426096	0.000512377	0.000603944	0.000687517	0.000790291	0.000783769	0.000537957	0.000414026	0.000312191
225.25	0.00912631	12.5654	0.00474415	0.260739	0.00979165	4.42672e-07	0.00130886			6.98795e-11	1.56079e-10	3.41717e-10	7.33353e-10	1.54271e-09	3.18113e-09	6.4299e-09	1.27395e-08	2.47414e-08	4.71003e-08	8.78916e-08	1.60767e-07	2.88251e-07	5.06607e-07	8.72764e-07	1.47383e-06	2.43963e-06	3.95845e-06	6.29581e-06	9.8153e-06	1.49997e-05	2.2469e-05	3.29923e-05	4.7486e-05	6.69954e-05	9.26508e-05	0.000125597	0.000166891	0.000217377	0.000277536	0.000347337	0.000426096	0.000512377	0.000603944	0.000697797	0.000778648	0.000877345	0.000852898	0.000573828	0.000432899
226.4	0.0098839	12.8755	0.00476851	0.262078	0.0107938	8.2794e-07	0.00132486			6.98795e-11	1.56079e-10	3.41717e-10	7.33353e-10	1.54271e-09	3.18113e-09	6.4299e-09	1.27395e-08	2.47414e-08	4.71003e-08	8.78916e-08	1.60767e-07	2.88251e-07	5.06607e-07	8.72764e-07	1.47383e-06	2.43963e-06	3.95845e-06	6.29581e-06	9.8153e-06	1.49997e-05	2.2469e-05	3.29923e-05	4.7486e-05	6.69954e-05	9.26508e-05	0.000125597	0.000166891	0.000217377	0.000277536	0.000347337	0.000426096	0.000512377	0.000603944	0.000697797	0.000790291	0.00086442	0.000954727	0.000909769	0.000599986
227.55	0.0107141	13.2013	0.004971	0.273206	0.0118143	1.21033e-06	0.00135091			6.98795e-11	1.56079e-10	3.41717e-10	7.33353e-10	1.54271e-09	3.18113e-09	6.4299e-09	1.27395e-08	2.47414e-08	4.71003e-08	8.78916e-08	1.60767e-07	2.88251e-07	5.06607e-07	8.72764e-07	1.47383e-06	2.43963e-06	3.95845e-06	6.29581e-06	9.8153e-06	1.49997e-05	2.2469e-05	3.29923e-05	4.7486e-05	6.69954e-05	9.26508e-05	0.000125597	0.000166891	0.000217377	0.000277536	0.000347337	0.000426096	0.000512377	0.000603944	0.000697797	0.000790291	0.000877345	0.000940662	0.00101839	0.000951241
228.7	0.0115679	13.544	0.00485659	0.266919	0.0128276	1.58692e-06	0.00136679			6.98795e-11	1.56079e-10	3.41717e-10	7.33353e-10	1.54271e-09	3.18113e-09	6.4299e-09	1.27395e-08	2.47414e-08	4.71003e-08	8.78916e-08	1.60767e-07	2.88251e-07	5.06607e-07	8.72764e-07	1.47383e-06	2.43963e-06	3.95845e-06	6.29581e-06	9.8153e-06	1.49997e-05	2.2469e-05	3.29923e-05	4.7486e-05	6.69954e-05	9.26508e-05	0.000125597	0.000166891	0.000217377	0.000277536	0.000347337	0.000426096	0.000512377	0.000603944	0.000697797	0.000790291	0.000877345	0.000954727	0.00100338	0.00106481
229.85	0.0124794	13.905	0.00491931	0.270365	0.0138187	1.79362e-06	0.00139542			6.98795e-11	1.56079e-10	3.41717e-10	7.33353e-10	1.54271e-09	3.18113e-09	6.4299e-09	1.27395e-08	2.47414e-08	4.71003e-08	8.78916e-08	1.60767e-07	2.88251e-07	5.06607e-07	8.72764e-07	1.47383e-06	2.43963e-06	3.95845e-06	6.29581e-06	9.8153e-06	1.49997e-05	2.2469e-05	3.29923e-05	4.7486e-05	6.69954e-05	9.26508e-05	0.000125597	0.000166891	0.000217377	0.000277536	0.000347337	0.000426096	0.000512377	0.000603944	0.000697797	0.000790291	0.000877345	0.000954727	0.00101839	0.00104912
231	0.0133891	14.2857	0.00465145	0.255644	0.0147661	1.89613e-06	0.0013924			6.98795e-11	1.56079e-10	3.41717e-10	7.33353e-10	1.54271e-09	3.18113e-09	6.4299e-09	1.27395e-08	2.47414e-08	4.71003e-08	8.78916e-08	1.60767e-07	2.88251e-07	5.06607e-07	8.72764e-07	1.47383e-06	2.43963e-06	3.95845e-06	6.29581e-06	9.8153e-06	1.49997e-05	2.2469e-05	3.29923e-05	4.7486e-05	6.69954e-05	9.26508e-05	0.000125597	0.000166891	0.000217377	0.000277536	0.000347337	0.000426096	0.000512377	0.000603944	0.000697797	0.000790291	0.000877345	0.000954727	0.00101839	0.00106481
232.15	0.0143569	14.6879	0.00468096	0.257266	0.0156754	1.73846e-06	0.00143073			6.98795e-11	1.56079e-10	3.41717e-10	7.33353e-10	1.54271e-09	3.18113e-09	6.4299e-09	1.27395e-08	2.47414e-08	4.71003e-08	8.78916e-08	1.60767e-07	2.88251e-07	5.06607e-07	8.72764e-07	1.47383e-06	2.43963e-06	3.95845e-06	6.29581e-06	9.8153e-06	1.49997e-05	2.2469e-05	3.29923e-05	4.7486e-05	6.69954e-05	9.26508e-05	0.000125597	0.000166891	0.000217377	0.000277536	0.000347337	0.000426096	0.000512377	0.000603944	0.000697797	0.000790291	0.000877345	0.000954727	0.00101839	0.00106481
233.3	0.0153776	15.1134	0.00466292	0.256274	0.0165151	1.29382e-06	0.00144408			6.98795e-11	1.56079e-10	3.41717e-10	7.33353e-10	1.54271e-09	3.18113e-09	6.4299e-09	1.27395e-08	2.47414e-08	4.71003e-08	8.78916e-08	1.60767e-07	2.88251e-07	5.06607e-07	8.72764e-07	1.47383e-06	2.43963e-06	3.95845e-06	6.29581e-06	9.8153e-06	1.49997e-05	2.2469e-05	3.29923e-05	4.7486e-05	6.69954e-05	9.26508e-05	0.000125597	0.000166891	0.000217377	0.000277536	0.000347337	0.000426096	0.000512377	0.000603944	0.000697797	0.000790291	0.000877345	0.000954727	0.00101839	0.00106481
234.45	0.0164789	15.5642	0.00474384	0.260722	0.0172802	6.42061e-07	0.00146576			6.98795e-11	1.56079e-10	3.41717e-10	7.33353e-10	1.54271e-09	3.18113e-09	6.4299e-09	1.27395e-08	2.47414e-08	4.71003e-08	8.78916e-08	1.60767e-07	2.88251e-07	5.06607e-07	8.72764e-07	1.47383e-06	2.43963e-06	3.95845e-06	6.29581e-06	9.8153e-06	1.49997e-05	2.2469e-05	3.29923e-05	4.7486e-05	6.69954e-05	9.26508e-05	0.000125597	0.000166891	0.000217377	0.000277536	0.000347337	0.000426096	0.000512377	0.000603944	0.000697797	0.000790291	0.000877345	0.000954727	0.00101839	0.00106481
235.6	0.0176744	16.0428	0.00484712	0.266398	0.017967	8.56367e-08	0.00147927			6.98795e-11	1.56079e-10	3.41717e-10	7.33353e-10	1.54271e-09	3.18113e-09	6.4299e-09	1.27395e-08	2.47414e-08	4.71003e-08	8.78916e-08	1.60767e-07	2.88251e-07	5.06607e-07	8.72764e-07	1.47383e-06	2.43963e-06	3.95845e-06	6.29581e-06	9.8153e-06	1.49997e-05	2.2469e-05	3.29923e-05	4.7486e-05	6.69954e-05	9.26508e-05	0.000125597	0.000166891	0.000217377	0.000277536	0.000347337	0.000426096	0.000512377	0.000603944	0.000697797	0.000790291	0.000877345	0.000954727	0.00101839	0.00106481
236.75	0.0189791	16.5517	0.00496954	0.273126	0.0185913	1.50429e-07	0.0015017			6.98795e-11	1.56079e-10	3.41717e-10	7.33353e-10	1.54271e-09	3.18113e-09	6.4299e-09	1.27395e-08	2.47414e-08	4.71003e-08	8.78916e-08	1.60767e-07	2.88251e-07	5.06607e-07	8.72764e-07	1.47383e-06	2.43963e-06	3.95845e-06	6.29581e-06	9.8153e-06	1.49997e-05	2.2469e-05	3.29923e-05	4.7486e-05	6.69954e-05	9.26508e-05	0.000125597	0.000166891	0.000217377	0.000277536	0.000347337	0.000426096	0.000512377	0.000603944	0.000697797	0.000790291	0.000877345	0.000954727	0.00101839	0.00106481
237.9	0.02056	17.094	0.00564524	0.310262	0.0191728	1.9243e-06	0.0015271			6.98795e-11	1.56079e-10	3.41717e-10	7.33353e-10	1.54271e-09	3.18113e-09	6.4299e-09	1.27395e-08	2.47414e-08	4.71003e-08	8.78916e-08	1.60767e-07	2.88251e-07	5.06607e-07	8.72764e-07	1.47383e-06	2.43963e-06	3.95845e-06	6.29581e-06	9.8153e-06	1.49997e-05	2.2469e-05	3.29923e-05	4.7486e-05	6.69954e-05	9.26508e-05	0.000125597	0.000166891	0.000217377	0.000277536	0.000347337	0.000426096	0.000512377	0.000603944	0.000697797	0.000790291	0.000877345	0.000954727	0.00101839	0.00106481
239.05	0.0222266	17.673	0.00556791	0.306013	0.0200991	4.5262e-06	0.00155524			6.98795e-11	1.56079e-10	3.41717e-10	7.33353e-10	1.54271e-09	3.18113e-09	6.4299e-09	1.27395e-08	2.47414e-08	4.71003e-08	8.78916e-08	1.60767e-07	2.88251e-07	5.06607e-07	8.72764e-07	1.47383e-06	2.43963e-06	3.95845e-06	6.29581e-06	9.8153e-06	1.49997e-05	2.2469e-05	3.29923e-05	4.7486e-05	6.69954e-05	9.26508e-05	0.000125597	0.000166891	0.000217377	0.000277536	0.000347337	0.000426096	0.000512377	0.000603944	0.000697797	0.000790291	0.000877345	0.000954727	0.00101839	0.00106481
240.2	0.0238651	18.2927	0.00510969	0.280829	0.0230141	7.24293e-07	0.00157012			6.98795e-11	1.56079e-10	3.41717e-10	7.33353e-10	1.54271e-09	3.18113e-09	6.4299e-09	1.27395e-08	2.47414e-08	4.71003e-08	8.78916e-08	1.60767e-07	2.88251e-07	5.06607e-07	8.72764e-07	1.47383e-06	2.43963e-06	3.95845e-06	6.29581e-06	9.8153e-06	1.49997e-05	2.2469e-05	3.29923e-05	4.7486e-05	6.69954e-05	9.26508e-05	0.000125597	0.000166891	0.000217377	0.000277536	0.000347337	0.000426096	0.000512377	0.000603944	0.000697797	0.000790291	0.000877345	0.000954727	0.00101839	0.00106481
241.35	0.0252325	18.9573	0.00397026	0.218206	0.0254694	5.60942e-08	0.00161387			6.98795e-11	1.56079e-10	3.41717e-10	7.33353e-10	1.54271e-09	3.18113e-09	6.4299e-09	1.27395e-08	2.47414e-08	4.71003e-08	8.78916e-08	1.60767e-07	2.88251e-07	5.06607e-07	8.72764e-07	1.47383e-06	2.43963e-06	3.95845e-06	6.29581e-06	9.8153e-06	1.49997e-05	2.2469e-05	3.29923e-05	4.7486e-05	6.69954e-05	9.26508e-05	0.000125597	0.000166891	0.000217377	0.000277536	0.000347337	0.000426096	0.000512377	0.000603944	0.000697797	0.000790291	0.000877345	0.000954727	0.00101839	0.00106481
242.5	0.0266712	19.6721	0.00387934	0.213209	0.0265502	1.46445e-08	0.0016285			6.98795e-11	1.56079e-10	3.41717e-10	7.33353e-10	1.54271e-09	3.18113e-09	6.4299e-09	1.27395e-08	2.47414e-08	4.71003e-08	8.78916e-08	1.60767e-07	2.88251e-07	5.06607e-07	8.72764e-07	1.47383e-06	2.43963e-06	3.95845e-06	6.29581e-06	9.8153e-06	1.49997e-05	2.2469e-05	3.29923e-05	4.7486e-05	6.69954e-05	9.26508e-05	0.000125597	0.000166891	0.000217377	0.000277536	0.000347337	0.000426096	0.000512377	0.000603944	0.000697797	0.000790291	0.000877345	0.000954727	0.00101839	0.00106481
243.65	0.0282037	20.4429	0.00382635	0.210296	0.0271647	1.07945e-06	0.00168701			6.98795e-11	1.56079e-10	3.41717e-10	7.33353e-10	1.54271e-09	3.18113e-09	6.4299e-09	1.27395e-08	2.47414e-08	4.71003e-08	8.78916e-08	1.60767e-07	2.88251e-07	5.06607e-07	8.72764e-07	1.47383e-06	2.43963e-06	3.95845e-06	6.29581e-06	9.8153e-06	1.49997e-05	2.2469e-05	3.29923e-05	4.7486e-05	6.69954e-05	9.26508e-05	0.000125597	0.000166891	0.000217377	0.000277536	0.000347337	0.000426096	0.000512377	0.000603944	0.000697797	0.000790291	0.000877345	0.000954727	0.00101839	0.00106481
244.8	0.0298415	21.2766	0.00377517	0.207484	0.0277543	4.35625e-06	0.00172115			6.98795e-11	1.56079e-10	3.41717e-10	7.33353e-10	1.54271e-09	3.18113e-09	6.4299e-09	1.27395e-08	2.47414e-08	4.71003e-08	8.78916e-08	1.60767e-07	2.88251e-07	5.06607e-07	8.72764e-07	1.47383e-06	2.43963e-06	3.95845e-06	6.29581e-06	9.8153e-06	1.49997e-05	2.2469e-05	3.29923e-05	4.7486e-05	6.69954e-05	9.26508e-05	0.000125597	0.000166891	0.000217377	0.000277536	0.000347337	0.000426096	0.000512377	0.000603944	0.000697797	0.000790291	0.000877345	0.000954727	0.00101839	0.00106481
245.95	0.0316508	22.1811	0.00383722	0.210893	0.028416	1.04634e-05	0.00177965			6.98795e-11	1.56079e-10	3.41717e-10	7.33353e-10	1.54271e-09	3.18113e-09	6.4299e-09	1.27395e-08	2.47414e-08	4.71003e-08	8.78916e-08	1.60767e-07	2.88251e-07	5.06607e-07	8.72764e-07	1.47383e-06	2.43963e-06	3.95845e-06	6.29581e-06	9.8153e-06	1.49997e-05	2.2469e-05	3.29923e-05	4.7486e-05	6.69954e-05	9.26508e-05	0.000125597	0.000166891	0.000217377	0.000277536	0.000347337	0.000426096	0.000512377	0.000603944	0.000697797	0.000790291	0.000877345	0.000954727	0.00101839	0.00106481
247.1	0.0342255	23.166	0.00500619	0.27514	0.0292294	2.49606e-05	0.00190266			6.98795e-11	1.56079e-10	3.41717e-10	7.33353e-10	1.54271e-09	3.18113e-09	6.4299e-09	1.27395e-08	2.47414e-08	4.71003e-08	8.78916e-08	1.60767e-07	2.88251e-07	5.06607e-07	8.72764e-07	1.47383e-06	2.43963e-06	3.95845e-06	6.29581e-06	9.8153e-06	1.49997e-05	2.2469e-05	3.29923e-05	4.7486e-05	6.69954e-05	9.26508e-05	0.000125597	0.000166891	0.000217377	0.000277536	0.000347337	0.000426096	0.000512377	0.000603944	0.000697797	0.000790291	0.000877345	0.000954727	0.00101839	0.00106481
248.25	0.0375623	24.2424	0.00592471	0.325623	0.0306309	4.80444e-05	0.00219894			6.98795e-11	1.56079e-10	3.41717e-10	7.33353e-10	1.54271e-09	3.18113e-09	6.4299e-09	1.27395e-08	2.47414e-08	4.71003e-08	8.78916e-08	1.60767e-07	2.88251e-07	5.06607e-07	8.72764e-07	1.47383e-06	2.43963e-06	3.95845e-06	6.29581e-06	9.8153e-06	1.49997e-05	2.2469e-05	3.29923e-05	4.7486e-05	6.69954e-05	9.26508e-05	0.000125597	0.000166891	0.000217377	0.000277536	0.000347337	0.000426096	0.000512377	0.000603944	0.000697797	0.000790291	0.000877345	0.000954727	0.00101839	0.00106481
249.4	0.041312	25.4237	0.00605349	0.3327	0.0352149	3.7175e-05	0.00457164			6.98795e-11	1.56079e-10	3.41717e-10	7.33353e-10	1.54271e-09	3.18113e-09	6.4299e-09	1.27395e-08	2.47414e-08	4.71003e-08	8.78916e-08	1.60767e-07	2.88251e-07	5.06607e-07	8.72764e-07	1.47383e-06	2.43963e-06	3.95845e-06	6.29581e-06	9.8153e-06	1.49997e-05	2.2469e-05	3.29923e-05	4.7486e-05	6.69954e-05	9.26508e-05	0.000125597	0.000166891	0.000217377	0.000277536	0.000347337	0.000426096	0.000512377	0.000603944	0.000697797	0.000790291	0.000877345	0.000954727	0.00101839	0.00106481
250.55	0.0448791	26.7261	0.00521102	0.286398	0.0454669	3.45564e-07	0.0169643			6.98795e-11	1.56079e-10	3.41717e-10	7.33353e-10	1.54271e-09	3.18113e-09	6.4299e-09	1.27395e-08	2.47414e-08	4.71003e-08	8.78916e-08	1.60767e-07	2.88251e-07	5.06607e-07	8.72764e-07	1.47383e-06	2.43963e-06	3.95845e-06	6.29581e-06	9.8153e-06	1.49997e-05	2.2469e-05	3.29923e-05	4.7486e-05	6.69954e-05	9.26508e-05	0.000125597	0.000166891	0.000217377	0.000277536	0.000347337	0.000426096	0.000512377	0.000603944	0.000697797	0.000790291	0.000877345	0.000954727	0.00101839	0.00106481
251.7	0.0484058	28.169	0.00463773	0.25489	0.0532674	2.3636e-05	0.0264899			6.98795e-11	1.56079e-10	3.41717e-10	7.33353e-10	1.54271e-09	3.18113e-09	6.4299e-09	1.27395e-08	2.47414e-08	4.71003e-08	8.78916e-08	1.60767e-07	2.88251e-07	5.06607e-07	8.72764e-07	1.47383e-06	2.43963e-06	3.95845e-06	6.29581e-06	9.8153e-06	1.49997e-05	2.2469e-05	3.29923e-05	4.7486e-05	6.69954e-05	9.26508e-05	0.000125597	0.000166891	0.000217377	0.000277536	0.000347337	0.000426096	0.000512377	0.000603944	0.000697797	0.000790291	0.000877345	0.000954727	0.00101839	0.00106481
252.85	0.0524506	29.7767	0.0047603	0.261626	0.0575892	2.64047e-05	0.0297996			6.98795e-11	1.56079e-10	3.41717e-10	7.33353e-10	1.54271e-09	3.18113e-09	6.4299e-09	1.27395e-08	2.47414e-08	4.71003e-08	8.78916e-08	1.60767e-07	2.88251e-07	5.06607e-07	8.72764e-07	1.47383e-06	2.43963e-06	3.95845e-06	6.29581e-06	9.8153e-06	1.49997e-05	2.2469e-05	3.29923e-05	4.7486e-05	6.69954e-05	9.26508e-05	0.000125597	0.000166891	0.000217377	0.000277536	0.000347337	0.000426096	0.000512377	0.000603944	0.000697797	0.000790291	0.000877345	0.000954727	0.00101839	0.00106481
254	0.0571316	31.5789	0.00489811	0.2692	0.0617339	2.1181e-05	0.0314756			6.98795e-11	1.56079e-10	3.41717e-10	7.33353e-10	1.54271e-09	3.18113e-09	6.4299e-09	1.27395e-08	2.47414e-08	4.71003e-08	8.78916e-08	1.60767e-07	2.88251e-07	5.06607e-07	8.72764e-07	1.47383e-06	2.43963e-06	3.95845e-06	6.29581e-06	9.8153e-06	1.49997e-05	2.2469e-05	3.29923e-05	4.7486e-05	6.69954e-05	9.26508e-05	0.000125597	0.000166891	0.000217377	0.000277536	0.000347337	0.000426096	0.000512377	0.000603944	0.000697797	0.000790291	0.000877345	0.000954727	0.00101839	0.00106481
255.15	0.0633146	33.6134	0.00571027	0.313837	0.0671854	1.49831e-05	0.0334213			6.98795e-11	1.56079e-10	3.41717e-10	7.33353e-10	1.54271e-09	3.18113e-09	6.4299e-09	1.27395e-08	2.47414e-08	4.71003e-08	8.78916e-08	1.60767e-07	2.88251e-07	5.06607e-07	8.72764e-07	1.47383e-06	2.43963e-06	3.95845e-06	6.29581e-06	9.8153e-06	1.49997e-05	2.2469e-05	3.29923e-05	4.7486e-05	6.69954e-05	9.26508e-05	0.000125597	0.000166891	0.000217377	0.000277536	0.000347337	0.000426096	0.000512377	0.000603944	0.000697797	0.000790291	0.000877345	0.000954727	0.00101839	0.00106481
256.3	0.0712748	35.9281	0.00643483	0.353658	0.0745078	1.0452e-05	0.0357373			6.98795e-11	1.56079e-10	3.41717e-10	7.33353e-10	1.54271e-09	3.18113e-09	6.4299e-09	1.27395e-08	2.47414e-08	4.71003e-08	8.78916e-08	1.60767e-07	2.88251e-07	5.06607e-07	8.72764e-07	1.47383e-06	2.43963e-06	3.95845e-06	6.29581e-06	9.8153e-06	1.49997e-05	2.2469e-05	3.29923e-05	4.7486e-05	6.69954e-05	9.26508e-05	0.000125597	0.000166891	0.000217377	0.000277536	0.000347337	0.000426096	0.000512377	0.000603944	0.000697797	0.000790291	0.000877345	0.000954727	0.00101839	0.00106481
257.45	0.0818572	38.5852	0.00741696	0.407637	0.0846208	7.63751e-06	0.0385606			6.98795e-11	1.56079e-10	3.41717e-10	7.33353e-10	1.54271e-09	3.18113e-09	6.4299e-09	1.27395e-08	2.47414e-08	4.71003e-08	8.78916e-08	1.60767e-07	2.88251e-07	5.06607e-07	8.72764e-07	1.47383e-06	2.43963e-06	3.95845e-06	6.29581e-06	9.8153e-06	1.49997e-05	2.2469e-05	3.29923e-05	4.7486e-05	6.69954e-05	9.26508e-05	0.000125597	0.000166891	0.000217377	0.000277536	0.000347337	0.000426096	0.000512377	0.000603944	0.000697797	0.000790291	0.000877345	0.000954727	0.00101839	0.00106481
258.6	0.0962283	41.6667	0.00863765	0.474726	0.0989605	7.46455e-06	0.0419927			6.98795e-11	1.56079e-10	3.41717e-10	7.33353e-10	1.54271e-09	3.18113e-09	6.4299e-09	1.27395e-08	2.47414e-08	4.71003e-08	8.78916e-08	1.60767e-07	2.88251e-07	5.06607e-07	8.72764e-07	1.47383e-06	2.43963e-06	3.95845e-06	6.29581e-06	9.8153e-06	1.49997e-05	2.2469e-05	3.29923e-05	4.7486e-05	6.69954e-05	9.26508e-05	0.000125597	0.000166891	0.000217377	0.000277536	0.000347337	0.000426096	0.000512377	0.000603944	0.000697797	0.000790291	0.000877345	0.000954727	0.00101839	0.00106481
259.75	0.117159	45.283	0.0106512	0.585389	0.11912	3.84705e-06	0.0461904			6.98795e-11	1.56079e-10	3.41717e-10	7.33353e-10	1.54271e-09	3.18113e-09	6.4299e-09	1.27395e-08	2.47414e-08	4.71003e-08	8.78916e-08	1.60767e-07	2.88251e-07	5.06607e-07	8.72764e-07	1.47383e-06	2.43963e-06	3.95845e-06	6.29581e-06	9.8153e-06	1.49997e-05	2.2469e-05	3.29923e-05	4.7486e-05	6.69954e-05	9.26508e-05	0.000125597	0.000166891	0.000217377	0.000277536	0.000347337	0.000426096	0.000512377	0.000603944	0.000697797	0.000790291	0.000877345	0.000954727	0.00101839	0.00106481
260.9	0.147657	49.5868	0.0129425	0.71132	0.148003	1.20114e-07	0.0517453			6.98795e-11	1.56079e-10	3.41717e-10	7.33353e-10	1.54271e-09	3.18113e-09	6.4299e-09	1.27395e-08	2.47414e-08	4.71003e-08	8.78916e-08	1.60767e-07	2.88251e-07	5.06607e-07	8.72764e-07	1.47383e-06	2.43963e-06	3.95845e-06	6.29581e-06	9.8153e-06	1.49997e-05	2.2469e-05	3.29923e-05	4.7486e-05	6.69954e-05	9.26508e-05	0.000125597	0.000166891	0.000217377	0.000277536	0.000347337	0.000426096	0.000512377	0.000603944	0.000697797	0.000790291	0.000877345	0.000954727	0.00101839	0.00106481
262.05	0.192329	54.7945	0.0155256	0.853289	0.187739	2.10666e-05	0.0590102			6.98795e-11	1.56079e-10	3.41717e-10	7.33353e-10	1.54271e-09	3.18113e-09	6.4299e-09	1.27395e-08	2.47414e-08	4.71003e-08	8.78916e-08	1.60767e-07	2.88251e-07	5.06607e-07	8.72764e-07	1.47383e-06	2.43963e-06	3.95845e-06	6.29581e-06	9.8153e-06	1.49997e-05	2.2469e-05	3.29923e-05	4.7486e-05	6.69954e-05	9.26508e-05	0.000125597	0.000166891	0.000217377	0.000277536	0.000347337	0.000426096	0.000512377	0.000603944	0.000697797	0.000790291	0.000877345	0.000954727	0.00101839	0.00106481
263.2	0.25769	61.2245	0.018195	1	0.265188	5.62215e-05	0.0685393			6.98795e-11	1.56079e-10	3.41717e-10	7.33353e-10	1.54271e-09	3.18113e-09	6.4299e-09	1.27395e-08	2.47414e-08	4.71003e-08	8.78916e-08	1.60767e-07	2.88251e-07	5.06607e-07	8.72764e-07	1.47383e-06	2.43963e-06	3.95845e-06	6.29581e-06	9.8153e-06	1.49997e-05	2.2469e-05	3.29923e-05	4.7486e-05	6.69954e-05	9.26508e-05	0.000125597	0.000166891	0.000217377	0.000277536	0.000347337	0.000426096	0.000512377	0.000603944	0.000697797	0.000790291	0.000877345	0.000954727	0.00101839	0.00106481
264.35	0.325724	69.3642	0.0147549	0.810928	0.303432	0.000496936	0.0815406			6.98795e-11	1.56079e-10	3.41717e-10	7.33353e-10	1.54271e-09	3.18113e-09	6.4299e-09	1.27395e-08	2.47414e-08	4.71003e-08	8.78916e-08	1.60767e-07	2.88251e-07	5.06607e-07	8.72764e-07	1.47383e-06	2.43963e-06	3.95845e-06	6.29581e-06	9.8153e-06	1.49997e-05	2.2469e-05	3.29923e-05	4.7486e-05	6.69954e-05	9.26508e-05	0.000125597	0.000166891	0.000217377	0.000277536	0.000347337	0.000426096	0.000512377	0.000603944	0.000697797	0.000790291	0.000877345	0.000954727	0.00101839	0.00106481
265.5	0.346712	80	0.00342203	0.188075	0.317528	0.000851698	0.0995985			6.98795e-11	1.56079e-10	3.41717e-10	7.33353e-10	1.54271e-09	3.18113e-09	6.4299e-09	1.27395e-08	2.47414e-08	4.71003e-08	8.78916e-08	1.60767e-07	2.88251e-07	5.06607e-07	8.72764e-07	1.47383e-06	2.43963e-06	3.95845e-06	6.29581e-06	9.8153e-06	1.49997e-05	2.2469e-05	3.29923e-05	4.7486e-05	6.69954e-05	9.26508e-05	0.000125597	0.000166891	0.000217377	0.000277536	0.000347337	0.000426096	0.000512377	0.000603944	0.000697797	0.000790291	0.000877345	0.000954727	0.00101839	0.00106481
266.65	0.353918	94.4882	0.000842232	0.0462891	0.341787	0.000147178	0.124944			6.98795e-11	1.56079e-10	3.41717e-10	7.33353e-10	1.54271e-09	3.18113e-09	6.4299e-09	1.27395e-08	2.47414e-08	4.71003e-08	8.78916e-08	1.60767e-07	2.88251e-07	5.06607e-07	8.72764e-07	1.47383e-06	2.43963e-06	3.95845e-06	6.29581e-06	9.8153e-06	1.49997e-05	2.2469e-05	3.29923e-05	4.7486e-05	6.69954e-05	9.26508e-05	0.000125597	0.000166891	0.000217377	0.000277536	0.000347337	0.000426096	0.000512377	0.000603944	0.000697797	0.000790291	0.000877345	0.000954727	0.00101839	0.00106481
267.8	0.366079	115.385	0.000953092	0.0523819	0.373304	5.21991e-05	0.161437			6.98795e-11	1.56079e-10	3.41717e-10	7.33353e-10	1.54271e-09	3.18113e-09	6.4299e-09	1.27395e-08	2.47414e-08	4.71003e-08	8.78916e-08	1.60767e-07	2.88251e-07	5.06607e-07	8.72764e-07	1.47383e-06	2.43963e-06	3.95845e-06	6.29581e-06	9.8153e-06	1.49997e-05	2.2469e-05	3.29923e-05	4.7486e-05	6.69954e-05	9.26508e-05	0.000125597	0.000166891	0.000217377	0.000277536	0.000347337	0.000426096	0.000512377	0.000603944	0.000697797	0.000790291	0.000877345	0.000954727	0.00101839	0.00106481
268.95	0.391906	148.148	0.0012279	0.0674855	0.419168	0.000743212	0.215404			6.98795e-11	1.56079e-10	3.41717e-10	7.33353e-10	1.54271e-09	3.18113e-09	6.4299e-09	1.27395e-08	2.47414e-08	4.71003e-08	8.78916e-08	1.60767e-07	2.88251e-07	5.06607e-07	8.72764e-07	1.47383e-06	2.43963e-06	3.95845e-06	6.29581e-06	9.8153e-06	1.49997e-05	2.2469e-05	3.29923e-05	4.7486e-05	6.69954e-05	9.26508e-05	0.000125597	0.000166891	0.000217377	0.000277536	0.000347337	0.000426096	0.000512377	0.000603944	0.000697797	0.000790291	0.000877345	0.000954727	0.00101839	0.00106481
270.1	0.458089	206.897	0.00161334	0.0886691	0.485499	0.000751297	0.293189			6.98795e-11	1.56079e-10	3.41717e-10	7.33353e-10	1.54271e-09	3.18113e-09	6.4299e-09	1.27395e-08	2.47414e-08	4.71003e-08	8.78916e-08	1.60767e-07	2.88251e-07	5.06607e-07	8.72764e-07	1.47383e-06	2.43963e-06	3.95845e-06	6.29581e-06	9.8153e-06	1.49997e-05	2.2469e-05	3.29923e-05	4.7486e-05	6.69954e-05	9.26508e-05	0.000125597	0.000166891	0.000217377	0.000277536	0.000347337	0.000426096	0.000512377	0.000603944	0.000697797	0.000790291	0.000877345	0.000954727	0.00101839	0.00106481
271.25	0.559304	342.857	0.000898471	0.04938	0.580671	0.00045653	0.40655			6.98795e-11	1.56079e-10	3.41717e-10	7.33353e-10	1.54271e-09	3.18113e-09	6.4299e-09	1.27395e-08	2.47414e-08	4.71003e-08	8.78916e-08	1.60767e-07	2.88251e-07	5.06607e-07	8.72764e-07	1.47383e-06	2.43963e-06	3.95845e-06	6.29581e-06	9.8153e-06	1.49997e-05	2.2469e-05	3.29923e-05	4.7486e-05	6.69954e-05	9.26508e-05	0.000125597	0.000166891	0.000217377	0.000277536	0.000347337	0.000426096	0.000512377	0.000603944	0.000697797	0.000790291	0.000877345	0.000954727	0.00101839	0.00106481
272.4	0.743386	1000	0.000192085	0.010557	0.732743	0.000113276	0.563467			6.98795e-11	1.56079e-10	3.41717e-10	7.33353e-10	1.54271e-09	3.18113e-09	6.4299e-09	1.27395e-08	2.47414e-08	4.71003e-08	8.78916e-08	1.60767e-07	2.88251e-07	5.06607e-07	8.72764e-07	1.47383e-06	2.43963e-06	3.95845e-06	6.29581e-06	9.8153e-06	1.49997e-05	2.2469e-05	3.29923e-05	4.7486e-05	6.69954e-05	9.26508e-05	0.000125597	0.000166891	0.000217377	0.000277536	0.000347337	0.000426096	0.000512377	0.000603944	0.000697797	0.000790291	0.000877345	0.000954727	0.00101839	0.00106481
273.55	0.97165	-1090.91	0.000200144	0.0109999	0.946533	0.000630838	0.893342			6.98795e-11	1.56079e-10	3.41717e-10	7.33353e-10	1.54271e-09	3.18113e-09	6.4299e-09	1.27395e-08	2.47414e-08	4.71003e-08	8.78916e-08	1.60767e-07	2.88251e-07	5.06607e-07	8.72764e-07	1.47383e-06	2.43963e-06	3.95845e-06	6.29581e-06	9.8153e-06	1.49997e-05	2.2469e-05	3.29923e-05	4.7486e-05	6.69954e-05	9.26508e-05	0.000125597	0.000166891	0.000217377	0.000277536	0.000347337	0.000426096	0.000512377	0.000603944	0.000697797	0.000790291	0.000877345	0.000954727	0.00101839	0.00106481
274.7	1	-352.941	0.000237484	0.0130521	1.00678	4.5913e-05	1			6.98795e-11	1.56079e-10	3.41717e-10	7.33353e-10	1.54271e-09	3.18113e-09	6.4299e-09	1.27395e-08	2.47414e-08	4.71003e-08	8.78916e-08	1.60767e-07	2.88251e-07	5.06607e-07	8.72764e-07	1.47383e-06	2.43963e-06	3.95845e-06	6.29581e-06	9.8153e-06	1.49997e-05	2.2469e-05	3.29923e-05	4.7486e-05	6.69954e-05	9.26508e-05	0.000125597	0.000166891	0.000217377	0.000277536	0.000347337	0.000426096	0.000512377	0.000603944	0.000697797	0.000790291	0.000877345	0.000954727	0.00101839	0.00106481
275.85	0.997082	-210.526	-6.86892e-05	-0.00377516	1.00075	1.34225e-05	0.985267			6.98795e-11	1.56079e-10	3.41717e-10	7.33353e-10	1.54271e-09	3.18113e-09	6.4299e-09	1.27395e-08	2.47414e-08	4.71003e-08	8.78916e-08	1.60767e-07	2.88251e-07	5.06607e-07	8.72764e-07	1.47383e-06	2.43963e-06	3.95845e-06	6.29581e-06	9.8153e-06	1.49997e-05	2.2469e-05	3.29923e-05	4.7486e-05	6.69954e-05	9.26508e-05	0.000125597	0.000166891	0.000217377	0.000277536	0.000347337	0.000426096	0.000512377	0.000603944	0.000697797	0.000790291	0.000877345	0.000954727	0.00101839	0.00106481
[truncated: 40 more columns]
