# Supplementary material for: Melting of aqueous NaCl solutions in porous materials: shifted phase transition distribution (SIDI) approach for determining NMR cryoporometry pore size distributions
Source: Royal Society of Chemistry journal article supplement (doi:10.1039/d3cp04029a), 2023-12-27
Supplement: d3cp04029a3.xlsx [file d3cp04029a3.xlsx]

## Sheet: Sheet1
Add measurement temperatures both to column A and row 19; measured signal intensities to column B; and saline intensities to column E
Use solver to minimize Diffsqusum (orange box), by letting parameters in yellow box to vary
										Melting point distribution is assumed to be a sum of three Gaussian distrubutions
						Diffsqusum				A1	A2	A3	Amplitude
						0.00396375				0.586867	0.258918	0.0310566
										Tmp 1	Tmp 2	Tmp 3	Mean melting temperature
						k (KÅ)				275.886	266.504	235.653
						300				Sigma 1	Sigma 2	Sigma 3	Width of distribution
						T0 (K)				0.376398	1.04657	13.496
						273
							Mean pore diameter		Dm (Å)	28.3435
									D*PSDN	0.0107335	0.0145327	0.0195308	0.0260532	0.034496	0.0453358	0.0591393	0.0765719	0.0984056	0.125523	0.158921	0.199703	0.249078	0.308338	0.378842	0.461982	0.559144	0.671662	0.800758	0.947485	1.11265	1.29675	1.49988	1.72171	1.96137	2.21741	2.48781	2.7699	3.06042	3.35552	3.65084	3.94159	4.22267	4.48881	4.73469	4.95517	5.14542	5.30109	5.41848	5.4947
							Pore diameter		D (Å)	6.81818	6.90846	7.00117	7.09639	7.19424	7.29483	7.39827	7.50469	7.61421	7.72698	7.84314	7.96284	8.08625	8.21355	8.34492	8.48057	8.62069	8.76552	8.9153	9.07029	9.23077	9.39702	9.56938	9.74817	9.93377	10.1266	10.327	10.5356	10.7527	10.979	11.215	11.4613	11.7188	11.988	12.2699	12.5654	12.8755	13.2013	13.544	13.905
					Max	0.0151172	Pore size distribution		PSD	2.37983e-05	3.18007e-05	4.21716e-05	5.55003e-05	7.24863e-05	9.39504e-05	0.000120842	0.000154244	0.000195374	0.000245576	0.000306311	0.00037913	0.00046565	0.000567503	0.00068629	0.000823516	0.000980514	0.00115836	0.0013578	0.00157915	0.00182219	0.00208611	0.00236944	0.00266999	0.00298481	0.00331021	0.00364178	0.00397447	0.00430265	0.0046203	0.00492115	0.00519887	0.00544726	0.00566051	0.00583339	0.00596147	0.00604126	0.00607043	0.00604786	0.00597373
					Sum	13.2658	Normalized PSD		PSDN	0.00157425	0.0021036	0.00278964	0.00367133	0.00479495	0.00621479	0.00799366	0.0102032	0.0129239	0.0162448	0.0202624	0.0250794	0.0308026	0.0375401	0.0453979	0.0544754	0.0648607	0.0766254	0.0898184	0.10446	0.120537	0.137996	0.156738	0.176619	0.197444	0.21897	0.240903	0.26291	0.284619	0.305632	0.325533	0.343904	0.360335	0.374441	0.385877	0.394349	0.399628	0.401557	0.400064	0.39516
							Sum D1	0.717095	MP D1	0	0	0	0	0	0	0	0	0	0	0	0	0	0	0	0	0	0	0	0	0	0	0	0	0	0	0	0	0	0	0	0	0	0	0	0	0	0	0	0
Tstep			Max				Sum D2	0.258919	MP D2	0	0	0	0	0	0	0	0	0	0	0	0	0	0	0	0	0	0	0	0	0	0	0	0	0	0	0	0	0	0	0	0	0	0	0	0	0	1.69863e-302	5.37027e-285	5.07594e-268
1.15			0.0132649				Sum D3	0.0310153	MP D3	9.21938e-07	1.26479e-06	1.72258e-06	2.32911e-06	3.12641e-06	4.16627e-06	5.51185e-06	7.23924e-06	9.43921e-06	1.22187e-05	1.57022e-05	2.00329e-05	2.53731e-05	3.19043e-05	3.98264e-05	4.93561e-05	6.07235e-05	7.41684e-05	8.99349e-05	0.000108264	0.000129386	0.00015351	0.000180814	0.000211434	0.000245451	0.000282879	0.000323656	0.000367631	0.000414561	0.0004641	0.000515799	0.000569111	0.000623389	0.000677905	0.000731855	0.000784382	0.000834597	0.000881603	0.000924519	0.00096251
			Conventional						MP Dtot	9.21938e-07	1.26479e-06	1.72258e-06	2.32911e-06	3.12641e-06	4.16627e-06	5.51185e-06	7.23924e-06	9.43921e-06	1.22187e-05	1.57022e-05	2.00329e-05	2.53731e-05	3.19043e-05	3.98264e-05	4.93561e-05	6.07235e-05	7.41684e-05	8.99349e-05	0.000108264	0.000129386	0.00015351	0.000180814	0.000211434	0.000245451	0.000282879	0.000323656	0.000367631	0.000414561	0.0004641	0.000515799	0.000569111	0.000623389	0.000677905	0.000731855	0.000784382	0.000834597	0.000881603	0.000924519	0.00096251
T (K)	Meas	D (Å)	PSD	PSDN	Fit	Diffsqu	Saline		T (K)	185	186.15	187.3	188.45	189.6	190.75	191.9	193.05	194.2	195.35	196.5	197.65	198.8	199.95	201.1	202.25	203.4	204.55	205.7	206.85	208	209.15	210.3	211.45	212.6	213.75	214.9	216.05	217.2	218.35	219.5	220.65	221.8	222.95	224.1	225.25	226.4	227.55	228.7	229.85
185	0.00109461	6.81818			0.00100099	8.7647e-09	0.000916993			9.08355e-07	1.26479e-06	1.53886e-06	1.31237e-06	1.27104e-06	1.2215e-06	1.18727e-06	1.16868e-06	1.17937e-06	1.21696e-06	1.28037e-06	1.37304e-06	1.49727e-06	1.65089e-06	1.8396e-06	2.07259e-06	2.34153e-06	2.65058e-06	3.00574e-06	3.40768e-06	3.85565e-06	4.06647e-06	3.06739e-06	9.66601e-07	5.39731e-07	5.38223e-07	5.75994e-07	6.3275e-07	6.99368e-07	7.55785e-07	8.32433e-07	8.93569e-07	9.69517e-07	1.03523e-06	1.09903e-06	1.16031e-06	1.22332e-06	1.2731e-06	1.32274e-06	1.3402e-06
186.15	0.00111377	6.90846	0.000418975	0.0315852	0.00102314	8.21418e-09	0.000927856			9.21938e-07	1.24615e-06	1.72258e-06	2.08069e-06	1.76163e-06	1.6938e-06	1.61601e-06	1.55936e-06	1.52384e-06	1.52665e-06	1.56392e-06	1.63349e-06	1.73905e-06	1.88268e-06	2.06083e-06	2.27978e-06	2.54994e-06	2.85998e-06	3.21404e-06	3.61832e-06	4.0725e-06	4.57454e-06	4.78976e-06	3.58684e-06	1.12211e-06	6.22032e-07	6.15807e-07	6.54256e-07	7.13524e-07	7.8294e-07	8.39977e-07	9.18471e-07	9.78793e-07	1.0543e-06	1.11761e-06	1.17791e-06	1.2346e-06	1.29222e-06	1.33508e-06	1.37709e-06
187.3	0.00113088	7.00117	0.000364221	0.0274574	0.00105269	6.11453e-09	0.000944597			9.21938e-07	1.26479e-06	1.6972e-06	2.32911e-06	2.79295e-06	2.34756e-06	2.24084e-06	2.12246e-06	2.03324e-06	1.97255e-06	1.9619e-06	1.99524e-06	2.06893e-06	2.18669e-06	2.35017e-06	2.55394e-06	2.80484e-06	3.11453e-06	3.46794e-06	3.86907e-06	4.32424e-06	4.83182e-06	5.38819e-06	5.60088e-06	4.16391e-06	1.29322e-06	7.11698e-07	6.99478e-07	7.37774e-07	7.98787e-07	8.70157e-07	9.26795e-07	1.00607e-06	1.06439e-06	1.13821e-06	1.19783e-06	1.25332e-06	1.30413e-06	1.35512e-06	1.38994e-06
188.45	0.00115596	7.09639	0.000519712	0.0391794	0.00107783	6.10518e-09	0.000951005			9.21938e-07	1.26479e-06	1.72258e-06	2.29479e-06	3.12641e-06	3.72191e-06	3.10574e-06	2.94311e-06	2.76747e-06	2.63195e-06	2.53492e-06	2.50299e-06	2.52712e-06	2.60149e-06	2.72967e-06	2.91251e-06	3.14215e-06	3.42587e-06	3.77661e-06	4.17473e-06	4.62391e-06	5.1305e-06	5.69123e-06	6.30066e-06	6.50198e-06	4.79885e-06	1.47964e-06	8.08398e-07	7.88769e-07	8.25936e-07	8.8777e-07	9.60094e-07	1.01519e-06	1.09405e-06	1.1491e-06	1.2199e-06	1.27451e-06	1.3239e-06	1.36762e-06	1.41081e-06
189.6	0.00117692	7.19424	0.000422487	0.0318499	0.00110592	5.04056e-09	0.000957435			9.21938e-07	1.26479e-06	1.72258e-06	2.32911e-06	3.08035e-06	4.16627e-06	4.92396e-06	4.07907e-06	3.83751e-06	3.58238e-06	3.38231e-06	3.23405e-06	3.17021e-06	3.17762e-06	3.24747e-06	3.38283e-06	3.58331e-06	3.83787e-06	4.15414e-06	4.5463e-06	4.9892e-06	5.48604e-06	6.04304e-06	6.65502e-06	7.31434e-06	7.49344e-06	5.49061e-06	1.68068e-06	9.11593e-07	8.83024e-07	9.17943e-07	9.79527e-07	1.05166e-06	1.10397e-06	1.18112e-06	1.23157e-06	1.29799e-06	1.34629e-06	1.38835e-06	1.42381e-06
190.75	0.00120179	7.29483	0.000487612	0.0367595	0.00114409	3.32951e-09	0.000971953			9.21938e-07	1.26479e-06	1.72258e-06	2.32911e-06	3.12641e-06	4.10489e-06	5.51185e-06	6.46712e-06	5.31868e-06	4.96751e-06	4.60371e-06	4.31516e-06	4.09616e-06	3.98624e-06	3.96665e-06	4.02452e-06	4.16194e-06	4.3767e-06	4.65371e-06	5.00077e-06	5.43327e-06	5.91943e-06	6.46182e-06	7.0664e-06	7.72571e-06	8.42968e-06	8.57362e-06	6.23662e-06	1.89522e-06	1.02053e-06	9.81391e-07	1.01282e-06	1.07295e-06	1.14363e-06	1.19182e-06	1.26589e-06	1.31041e-06	1.3711e-06	1.41183e-06	1.4454e-06
191.9	0.00123388	7.39827	0.000611918	0.0461305	0.00117968	2.93785e-09	0.000975278			9.21938e-07	1.26479e-06	1.72258e-06	2.32911e-06	3.12641e-06	4.16627e-06	5.43064e-06	7.23924e-06	8.43244e-06	6.88483e-06	6.38373e-06	5.87342e-06	5.46545e-06	5.15054e-06	4.97607e-06	4.91579e-06	4.95143e-06	5.08345e-06	5.30708e-06	5.60216e-06	5.9764e-06	6.4463e-06	6.9723e-06	7.55609e-06	8.20328e-06	8.90378e-06	9.64482e-06	9.73853e-06	7.03276e-06	2.1217e-06	1.13421e-06	1.08282e-06	1.10942e-06	1.16678e-06	1.23464e-06	1.27736e-06	1.34693e-06	1.38422e-06	1.43784e-06	1.46985e-06
193.05	0.00126795	7.50469	0.000631194	0.0475837	0.0012292	1.50141e-09	0.000989139			9.21938e-07	1.26479e-06	1.72258e-06	2.32911e-06	3.12641e-06	4.16627e-06	5.51185e-06	7.13259e-06	9.43921e-06	1.09155e-05	8.84768e-06	8.14437e-06	7.43909e-06	6.8723e-06	6.42947e-06	6.16674e-06	6.04797e-06	6.04774e-06	6.16408e-06	6.38869e-06	6.69511e-06	7.09069e-06	7.59287e-06	8.15302e-06	8.77176e-06	9.45417e-06	1.01873e-05	1.09553e-05	1.09817e-05	7.87315e-06	2.35805e-06	1.25144e-06	1.1861e-06	1.20643e-06	1.25963e-06	1.32326e-06	1.35914e-06	1.42279e-06	1.4516e-06	1.49693e-06
194.2	0.00130492	7.61421	0.000665442	0.0501655	0.00128295	4.82881e-10	0.000997818			9.21938e-07	1.26479e-06	1.72258e-06	2.32911e-06	3.12641e-06	4.16627e-06	5.51185e-06	7.23924e-06	9.30015e-06	1.22187e-05	1.40274e-05	1.12879e-05	1.03154e-05	9.35397e-06	8.57876e-06	7.96791e-06	7.58702e-06	7.38707e-06	7.33335e-06	7.42034e-06	7.6351e-06	7.94341e-06	8.35189e-06	8.87869e-06	9.46472e-06	1.01093e-05	1.0817e-05	1.15714e-05	1.23538e-05	1.2294e-05	8.75019e-06	2.60177e-06	1.37079e-06	1.28982e-06	1.30245e-06	1.35004e-06	1.40797e-06	1.43569e-06	1.49205e-06	1.51125e-06
195.35	0.00134515	7.72698	0.000703052	0.0530008	0.00134254	6.84836e-12	0.00100341			9.21938e-07	1.26479e-06	1.72258e-06	2.32911e-06	3.12641e-06	4.16627e-06	5.51185e-06	7.23924e-06	9.43921e-06	1.20387e-05	1.57022e-05	1.78962e-05	1.42969e-05	1.29707e-05	1.16767e-05	1.06315e-05	9.80303e-06	9.26689e-06	8.95739e-06	8.82792e-06	8.86802e-06	9.05866e-06	9.35628e-06	9.76624e-06	1.03071e-05	1.0908e-05	1.15666e-05	1.22867e-05	1.30486e-05	1.383e-05	1.36635e-05	9.65459e-06	2.84991e-06	1.49067e-06	1.39247e-06	1.39593e-06	1.43647e-06	1.48727e-06	1.50558e-06	1.55337e-06
196.5	0.00139079	7.84314	0.000774077	0.0583551	0.00141681	6.77223e-10	0.00101701			9.21938e-07	1.26479e-06	1.72258e-06	2.32911e-06	3.12641e-06	4.16627e-06	5.51185e-06	7.23924e-06	9.43921e-06	1.22187e-05	1.54709e-05	2.00329e-05	2.26668e-05	1.7977e-05	1.61914e-05	1.44706e-05	1.30801e-05	1.19736e-05	1.12368e-05	1.07829e-05	1.05502e-05	1.05215e-05	1.06699e-05	1.09407e-05	1.13375e-05	1.18788e-05	1.24803e-05	1.31382e-05	1.38552e-05	1.46078e-05	1.53706e-05	1.50757e-05	1.05754e-05	3.09914e-06	1.6093e-06	1.49241e-06	1.48529e-06	1.51737e-06	1.55967e-06	1.56744e-06
197.65	0.00146152	7.96284	0.00116407	0.0877556	0.0015035	1.76247e-09	0.00103228			9.21938e-07	1.26479e-06	1.72258e-06	2.32911e-06	3.12641e-06	4.16627e-06	5.51185e-06	7.23924e-06	9.43921e-06	1.22187e-05	1.57022e-05	1.97377e-05	2.53731e-05	2.85014e-05	2.24409e-05	2.00657e-05	1.78034e-05	1.59762e-05	1.45189e-05	1.35269e-05	1.28866e-05	1.25173e-05	1.23929e-05	1.24768e-05	1.27009e-05	1.30663e-05	1.35912e-05	1.41761e-05	1.48153e-05	1.55108e-05	1.62351e-05	1.69593e-05	1.65135e-05	1.15002e-05	3.34578e-06	1.72481e-06	1.58796e-06	1.56895e-06	1.59124e-06	1.62376e-06
198.8	0.00153078	8.08625	0.00110533	0.0833272	0.00159611	4.26759e-09	0.00103677			9.21938e-07	1.26479e-06	1.72258e-06	2.32911e-06	3.12641e-06	4.16627e-06	5.51185e-06	7.23924e-06	9.43921e-06	1.22187e-05	1.57022e-05	2.00329e-05	2.49992e-05	3.19043e-05	3.55786e-05	2.78105e-05	2.46871e-05	2.17454e-05	1.93723e-05	1.74779e-05	1.6166e-05	1.52894e-05	1.47437e-05	1.44915e-05	1.44841e-05	1.46376e-05	1.49498e-05	1.54378e-05	1.59857e-05	1.65857e-05	1.72387e-05	1.79131e-05	1.85768e-05	1.79577e-05	1.24154e-05	3.58591e-06	1.83523e-06	1.67739e-06	1.64532e-06	1.65663e-06
199.95	0.00163457	8.21355	0.00160538	0.121024	0.00170646	5.16715e-09	0.00104438			9.21938e-07	1.26479e-06	1.72258e-06	2.32911e-06	3.12641e-06	4.16627e-06	5.51185e-06	7.23924e-06	9.43921e-06	1.22187e-05	1.57022e-05	2.00329e-05	2.53731e-05	3.14342e-05	3.98264e-05	4.40918e-05	3.42157e-05	3.01532e-05	2.63679e-05	2.33205e-05	2.08877e-05	1.91801e-05	1.80088e-05	1.72405e-05	1.6823e-05	1.66927e-05	1.67476e-05	1.69811e-05	1.74085e-05	1.78959e-05	1.84333e-05	1.90204e-05	1.96216e-05	2.02013e-05	1.93868e-05	1.33065e-05	3.81548e-06	1.93859e-06	1.75905e-06	1.71293e-06
201.1	0.00175914	8.34492	0.00186651	0.14071	0.00183641	5.97035e-09	0.0010558			9.21938e-07	1.26479e-06	1.72258e-06	2.32911e-06	3.12641e-06	4.16627e-06	5.51185e-06	7.23924e-06	9.43921e-06	1.22187e-05	1.57022e-05	2.00329e-05	2.53731e-05	3.19043e-05	3.92397e-05	4.93561e-05	5.42468e-05	4.17915e-05	3.65631e-05	3.17418e-05	2.78702e-05	2.47822e-05	2.25916e-05	2.10585e-05	2.00142e-05	1.93883e-05	1.9099e-05	1.90232e-05	1.91488e-05	1.94888e-05	1.98895e-05	2.03385e-05	2.08345e-05	2.13375e-05	2.1809e-05	2.07782e-05	1.41584e-05	4.03037e-06	2.03296e-06	1.83133e-06
202.25	0.00191045	8.48057	0.00219531	0.165498	0.00197943	4.75891e-09	0.00105956			9.21938e-07	1.26479e-06	1.72258e-06	2.32911e-06	3.12641e-06	4.16627e-06	5.51185e-06	7.23924e-06	9.43921e-06	1.22187e-05	1.57022e-05	2.00329e-05	2.53731e-05	3.19043e-05	3.98264e-05	4.86289e-05	6.07235e-05	6.62578e-05	5.06754e-05	4.40148e-05	3.79345e-05	3.30666e-05	2.91902e-05	2.64174e-05	2.44465e-05	2.30661e-05	2.21831e-05	2.1694e-05	2.14516e-05	2.1437e-05	2.16598e-05	2.19452e-05	2.22783e-05	2.26564e-05	2.30356e-05	2.33743e-05	2.21084e-05	1.49558e-05	4.22657e-06	2.1165e-06
203.4	0.00209404	8.62069	0.0025778	0.194332	0.00215389	3.58277e-09	0.00107819			9.21938e-07	1.26479e-06	1.72258e-06	2.32911e-06	3.12641e-06	4.16627e-06	5.51185e-06	7.23924e-06	9.43921e-06	1.22187e-05	1.57022e-05	2.00329e-05	2.53731e-05	3.19043e-05	3.98264e-05	4.93561e-05	5.98289e-05	7.41684e-05	8.03427e-05	6.10032e-05	5.26019e-05	4.50074e-05	3.8948e-05	3.41334e-05	3.06676e-05	2.81743e-05	2.63911e-05	2.51972e-05	2.44633e-05	2.4015e-05	2.3825e-05	2.38985e-05	2.40382e-05	2.42265e-05	2.44595e-05	2.46889e-05	2.48707e-05	2.33536e-05	1.56839e-05	4.40025e-06
204.55	0.00230548	8.76552	0.00287165	0.216484	0.00234744	1.76051e-09	0.00109026			9.21938e-07	1.26479e-06	1.72258e-06	2.32911e-06	3.12641e-06	4.16627e-06	5.51185e-06	7.23924e-06	9.43921e-06	1.22187e-05	1.57022e-05	2.00329e-05	2.53731e-05	3.19043e-05	3.98264e-05	4.93561e-05	6.07235e-05	7.30758e-05	8.99349e-05	9.67169e-05	7.29047e-05	6.24095e-05	5.30127e-05	4.55437e-05	3.96249e-05	3.5344e-05	3.22356e-05	2.99769e-05	2.84137e-05	2.73866e-05	2.66902e-05	2.62875e-05	2.61778e-05	2.61404e-05	2.61545e-05	2.6215e-05	2.62694e-05	2.62714e-05	2.44904e-05	1.63283e-05
205.7	0.00253261	8.9153	0.00298186	0.224792	0.00256504	1.0511e-09	0.00109695			9.21938e-07	1.26479e-06	1.72258e-06	2.32911e-06	3.12641e-06	4.16627e-06	5.51185e-06	7.23924e-06	9.43921e-06	1.22187e-05	1.57022e-05	2.00329e-05	2.53731e-05	3.19043e-05	3.98264e-05	4.93561e-05	6.07235e-05	7.41684e-05	8.861e-05	0.000108264	0.000115586	8.64978e-05	7.351e-05	6.19901e-05	5.2871e-05	4.56672e-05	4.04388e-05	3.66155e-05	3.38036e-05	3.18091e-05	3.04374e-05	2.94488e-05	2.87946e-05	2.84671e-05	2.82207e-05	2.80317e-05	2.78933e-05	2.7749e-05	2.75503e-05	2.54968e-05
206.85	0.0027887	9.07029	0.00324808	0.244862	0.00281352	6.16201e-10	0.00110399			9.21938e-07	1.26479e-06	1.72258e-06	2.32911e-06	3.12641e-06	4.16627e-06	5.51185e-06	7.23924e-06	9.43921e-06	1.22187e-05	1.57022e-05	2.00329e-05	2.53731e-05	3.19043e-05	3.98264e-05	4.93561e-05	6.07235e-05	7.41684e-05	8.99349e-05	0.000106669	0.000129386	0.000137137	0.000101883	8.59586e-05	7.19634e-05	6.09331e-05	5.22501e-05	4.59333e-05	4.12897e-05	3.7843e-05	3.53525e-05	3.35833e-05	3.22574e-05	3.13127e-05	3.07325e-05	3.02462e-05	2.98263e-05	2.94643e-05	2.90998e-05	2.86824e-05
208	0.00306716	9.23077	0.00341015	0.25708	0.0030972	9.02506e-10	0.00111475			9.21938e-07	1.26479e-06	1.72258e-06	2.32911e-06	3.12641e-06	4.16627e-06	5.51185e-06	7.23924e-06	9.43921e-06	1.22187e-05	1.57022e-05	2.00329e-05	2.53731e-05	3.19043e-05	3.98264e-05	4.93561e-05	6.07235e-05	7.41684e-05	8.99349e-05	0.000108264	0.00012748	0.00015351	0.000161529	0.000119136	9.9788e-05	8.29369e-05	6.97166e-05	5.93494e-05	5.17969e-05	4.62236e-05	4.20586e-05	3.90064e-05	3.67864e-05	3.50784e-05	3.38047e-05	3.29383e-05	3.21825e-05	3.15061e-05	3.08986e-05	3.02956e-05
209.15	0.00337871	9.39702	0.0036815	0.277536	0.00341663	1.43832e-09	0.00112739			9.21938e-07	1.26479e-06	1.72258e-06	2.32911e-06	3.12641e-06	4.16627e-06	5.51185e-06	7.23924e-06	9.43921e-06	1.22187e-05	1.57022e-05	2.00329e-05	2.53731e-05	3.19043e-05	3.98264e-05	4.93561e-05	6.07235e-05	7.41684e-05	8.99349e-05	0.000108264	0.000129386	0.000151248	0.000180814	0.000188883	0.000138303	0.000115004	9.48922e-05	7.91891e-05	6.69256e-05	5.79864e-05	5.13728e-05	4.64056e-05	4.27267e-05	4.00033e-05	3.787e-05	3.62309e-05	3.5047e-05	3.39951e-05	3.30398e-05	3.21683e-05
210.3	0.00372873	9.56938	0.00398848	0.300678	0.0037766	2.29156e-09	0.00114526			9.21938e-07	1.26479e-06	1.72258e-06	2.32911e-06	3.12641e-06	4.16627e-06	5.51185e-06	7.23924e-06	9.43921e-06	1.22187e-05	1.57022e-05	2.00329e-05	2.53731e-05	3.19043e-05	3.98264e-05	4.93561e-05	6.07235e-05	7.41684e-05	8.99349e-05	0.000108264	0.000129386	0.00015351	0.00017815	0.000211434	0.000219271	0.000159393	0.000131582	0.000107785	8.9298e-05	7.4923e-05	6.44459e-05	5.66826e-05	5.08315e-05	4.64631e-05	4.31869e-05	4.05881e-05	3.85504e-05	3.70209e-05	3.565e-05	3.43975e-05
211.45	0.0040943	9.74817	0.00401434	0.302628	0.00416941	5.64148e-09	0.00115212			9.21938e-07	1.26479e-06	1.72258e-06	2.32911e-06	3.12641e-06	4.16627e-06	5.51185e-06	7.23924e-06	9.43921e-06	1.22187e-05	1.57022e-05	2.00329e-05	2.53731e-05	3.19043e-05	3.98264e-05	4.93561e-05	6.07235e-05	7.41684e-05	8.99349e-05	0.000108264	0.000129386	0.00015351	0.000180814	0.000208319	0.000245451	0.000252708	0.000182369	0.000149461	0.000121545	9.99688e-05	8.32692e-05	7.11069e-05	6.20886e-05	5.52768e-05	5.01608e-05	4.62866e-05	4.31865e-05	4.07216e-05	3.8823e-05	3.71149e-05
212.6	0.00453582	9.93377	0.00466877	0.351963	0.00461041	5.5644e-09	0.00116503			9.21938e-07	1.26479e-06	1.72258e-06	2.32911e-06	3.12641e-06	4.16627e-06	5.51185e-06	7.23924e-06	9.43921e-06	1.22187e-05	1.57022e-05	2.00329e-05	2.53731e-05	3.19043e-05	3.98264e-05	4.93561e-05	6.07235e-05	7.41684e-05	8.99349e-05	0.000108264	0.000129386	0.00015351	0.000180814	0.000211434	0.000241835	0.000282879	0.000289135	0.000207148	0.00016854	0.000136069	0.000111105	9.18757e-05	7.78887e-05	6.75183e-05	5.96759e-05	5.3761e-05	4.92498e-05	4.56188e-05	4.27039e-05	4.04184e-05
213.75	0.00500813	10.1266	0.00480605	0.362313	0.00508666	6.16598e-09	0.00116387			9.21938e-07	1.26479e-06	1.72258e-06	2.32911e-06	3.12641e-06	4.16627e-06	5.51185e-06	7.23924e-06	9.43921e-06	1.22187e-05	1.57022e-05	2.00329e-05	2.53731e-05	3.19043e-05	3.98264e-05	4.93561e-05	6.07235e-05	7.41684e-05	8.99349e-05	0.000108264	0.000129386	0.00015351	0.000180814	0.000211434	0.000245451	0.000278711	0.000323656	0.00032842	0.000233591	0.00018868	0.000151227	0.000122589	0.000100638	8.47001e-05	7.28916e-05	6.3959e-05	5.72027e-05	5.20236e-05	4.78395e-05	4.44588e-05
214.9	0.00554084	10.327	0.00521215	0.392927	0.00561866	6.05644e-09	0.00117655			9.21938e-07	1.26479e-06	1.72258e-06	2.32911e-06	3.12641e-06	4.16627e-06	5.51185e-06	7.23924e-06	9.43921e-06	1.22187e-05	1.57022e-05	2.00329e-05	2.53731e-05	3.19043e-05	3.98264e-05	4.93561e-05	6.07235e-05	7.41684e-05	8.99349e-05	0.000108264	0.000129386	0.00015351	0.000180814	0.000211434	0.000245451	0.000282879	0.000318887	0.000367631	0.000370345	0.000261505	0.000209698	0.000166857	0.00013428	0.000109439	9.14407e-05	7.81232e-05	6.80536e-05	6.04244e-05	5.45561e-05	4.98053e-05
216.05	0.00610682	10.5356	0.00532072	0.401112	0.00620009	8.69976e-09	0.00119248			9.21938e-07	1.26479e-06	1.72258e-06	2.32911e-06	3.12641e-06	4.16627e-06	5.51185e-06	7.23924e-06	9.43921e-06	1.22187e-05	1.57022e-05	2.00329e-05	2.53731e-05	3.19043e-05	3.98264e-05	4.93561e-05	6.07235e-05	7.41684e-05	8.99349e-05	0.000108264	0.000129386	0.00015351	0.000180814	0.000211434	0.000245451	0.000282879	0.000323656	0.000362215	0.000414561	0.0004146	0.000290636	0.000231372	0.000182771	0.000146023	0.000118149	9.80037e-05	8.31246e-05	7.18864e-05	6.33659e-05	5.67979e-05
217.2	0.0067232	10.7527	0.00556285	0.419365	0.00683248	1.19432e-08	0.00121086			9.21938e-07	1.26479e-06	1.72258e-06	2.32911e-06	3.12641e-06	4.16627e-06	5.51185e-06	7.23924e-06	9.43921e-06	1.22187e-05	1.57022e-05	2.00329e-05	2.53731e-05	3.19043e-05	3.98264e-05	4.93561e-05	6.07235e-05	7.41684e-05	8.99349e-05	0.000108264	0.000129386	0.00015351	0.000180814	0.000211434	0.000245451	0.000282879	0.000323656	0.000367631	0.000408454	0.0004641	0.000460785	0.000320675	0.000253439	0.000198754	0.000157644	0.000126628	0.000104278	8.78063e-05	7.53858e-05	6.59697e-05
218.35	0.00740679	10.979	0.0059178	0.446123	0.00751239	1.11503e-08	0.00122669			9.21938e-07	1.26479e-06	1.72258e-06	2.32911e-06	3.12641e-06	4.16627e-06	5.51185e-06	7.23924e-06	9.43921e-06	1.22187e-05	1.57022e-05	2.00329e-05	2.53731e-05	3.19043e-05	3.98264e-05	4.93561e-05	6.07235e-05	7.41684e-05	8.99349e-05	0.000108264	0.000129386	0.00015351	0.000180814	0.000211434	0.000245451	0.000282879	0.000323656	0.000367631	0.000414561	0.000457262	0.000515799	0.00050841	0.000351259	0.000275602	0.000214572	0.000168959	0.000134735	0.000110151	9.20807e-05	7.84836e-05
219.5	0.00812699	11.215	0.005975	0.450436	0.00823493	1.16523e-08	0.00123515			9.21938e-07	1.26479e-06	1.72258e-06	2.32911e-06	3.12641e-06	4.16627e-06	5.51185e-06	7.23924e-06	9.43921e-06	1.22187e-05	1.57022e-05	2.00329e-05	2.53731e-05	3.19043e-05	3.98264e-05	4.93561e-05	6.07235e-05	7.41684e-05	8.99349e-05	0.000108264	0.000129386	0.00015351	0.000180814	0.000211434	0.000245451	0.000282879	0.000323656	0.000367631	0.000414561	0.0004641	0.0005082	0.000569111	0.0005569	0.000381977	0.000297535	0.000229972	0.000179775	0.000142324	0.000115513	9.58645e-05
220.65	0.0089081	11.4613	0.00620479	0.467759	0.00900209	8.83441e-09	0.00124164			9.21938e-07	1.26479e-06	1.72258e-06	2.32911e-06	3.12641e-06	4.16627e-06	5.51185e-06	7.23924e-06	9.43921e-06	1.22187e-05	1.57022e-05	2.00329e-05	2.53731e-05	3.19043e-05	3.98264e-05	4.93561e-05	6.07235e-05	7.41684e-05	8.99349e-05	0.000108264	0.000129386	0.00015351	0.000180814	0.000211434	0.000245451	0.000282879	0.000323656	0.000367631	0.000414561	0.0004641	0.000515799	0.000560726	0.000623389	0.000605601	0.000412376	0.00031889	0.000244695	0.000189901	0.000149252	0.00012026
221.8	0.00969956	11.7188	0.00601381	0.453362	0.00982361	1.53899e-08	0.00126218			9.21938e-07	1.26479e-06	1.72258e-06	2.32911e-06	3.12641e-06	4.16627e-06	5.51185e-06	7.23924e-06	9.43921e-06	1.22187e-05	1.57022e-05	2.00329e-05	2.53731e-05	3.19043e-05	3.98264e-05	4.93561e-05	6.07235e-05	7.41684e-05	8.99349e-05	0.000108264	0.000129386	0.00015351	0.000180814	0.000211434	0.000245451	0.000282879	0.000323656	0.000367631	0.000414561	0.0004641	0.000515799	0.000569111	0.000614205	0.000677905	0.000653796	0.000441973	0.000339306	0.000258476	0.000199145	0.000155385
222.95	0.010566	11.988	0.00629134	0.474283	0.0106868	1.45903e-08	0.00128036			9.21938e-07	1.26479e-06	1.72258e-06	2.32911e-06	3.12641e-06	4.16627e-06	5.51185e-06	7.23924e-06	9.43921e-06	1.22187e-05	1.57022e-05	2.00329e-05	2.53731e-05	3.19043e-05	3.98264e-05	4.93561e-05	6.07235e-05	7.41684e-05	8.99349e-05	0.000108264	0.000129386	0.00015351	0.000180814	0.000211434	0.000245451	0.000282879	0.000323656	0.000367631	0.000414561	0.0004641	0.000515799	0.000569111	0.000623389	0.000667918	0.000731855	0.000700721	0.000470268	0.000358416	0.000271059	0.000207328
224.1	0.0114742	12.2699	0.00629448	0.47452	0.0115895	1.33043e-08	0.00130059			9.21938e-07	1.26479e-06	1.72258e-06	2.32911e-06	3.12641e-06	4.16627e-06	5.51185e-06	7.23924e-06	9.43921e-06	1.22187e-05	1.57022e-05	2.00329e-05	2.53731e-05	3.19043e-05	3.98264e-05	4.93561e-05	6.07235e-05	7.41684e-05	8.99349e-05	0.000108264	0.000129386	0.00015351	0.000180814	0.000211434	0.000245451	0.000282879	0.000323656	0.000367631	0.000414561	0.0004641	0.000515799	0.000569111	0.000623389	0.000677905	0.000721072	0.000784382	0.000745581	0.000496754	0.000375863	0.000282197
225.25	0.0123642	12.5654	0.00588218	0.443438	0.0125175	2.34898e-08	0.00130886			9.21938e-07	1.26479e-06	1.72258e-06	2.32911e-06	3.12641e-06	4.16627e-06	5.51185e-06	7.23924e-06	9.43921e-06	1.22187e-05	1.57022e-05	2.00329e-05	2.53731e-05	3.19043e-05	3.98264e-05	4.93561e-05	6.07235e-05	7.41684e-05	8.99349e-05	0.000108264	0.000129386	0.00015351	0.000180814	0.000211434	0.000245451	0.000282879	0.000323656	0.000367631	0.000414561	0.0004641	0.000515799	0.000569111	0.000623389	0.000677905	0.000731855	0.000772826	0.000834597	0.000787573	0.000520936	0.000391308
226.4	0.0133399	12.8755	0.00614123	0.462967	0.0134804	1.97547e-08	0.00132486			9.21938e-07	1.26479e-06	1.72258e-06	2.32911e-06	3.12641e-06	4.16627e-06	5.51185e-06	7.23924e-06	9.43921e-06	1.22187e-05	1.57022e-05	2.00329e-05	2.53731e-05	3.19043e-05	3.98264e-05	4.93561e-05	6.07235e-05	7.41684e-05	8.99349e-05	0.000108264	0.000129386	0.00015351	0.000180814	0.000211434	0.000245451	0.000282879	0.000323656	0.000367631	0.000414561	0.0004641	0.000515799	0.000569111	0.000623389	0.000677905	0.000731855	0.000784382	0.000822301	0.000881603	0.000825911	0.000542342
227.55	0.0143491	13.2013	0.00604256	0.455529	0.0144753	1.59365e-08	0.00135091			9.21938e-07	1.26479e-06	1.72258e-06	2.32911e-06	3.12641e-06	4.16627e-06	5.51185e-06	7.23924e-06	9.43921e-06	1.22187e-05	1.57022e-05	2.00329e-05	2.53731e-05	3.19043e-05	3.98264e-05	4.93561e-05	6.07235e-05	7.41684e-05	8.99349e-05	0.000108264	0.000129386	0.00015351	0.000180814	0.000211434	0.000245451	0.000282879	0.000323656	0.000367631	0.000414561	0.0004641	0.000515799	0.000569111	0.000623389	0.000677905	0.000731855	0.000784382	0.000834597	0.000868615	0.000924519	0.00085985
228.7	0.0153748	13.544	0.00583447	0.439842	0.0154818	1.14567e-08	0.00136679			9.21938e-07	1.26479e-06	1.72258e-06	2.32911e-06	3.12641e-06	4.16627e-06	5.51185e-06	7.23924e-06	9.43921e-06	1.22187e-05	1.57022e-05	2.00329e-05	2.53731e-05	3.19043e-05	3.98264e-05	4.93561e-05	6.07235e-05	7.41684e-05	8.99349e-05	0.000108264	0.000129386	0.00015351	0.000180814	0.000211434	0.000245451	0.000282879	0.000323656	0.000367631	0.000414561	0.0004641	0.000515799	0.000569111	0.000623389	0.000677905	0.000731855	0.000784382	0.000834597	0.000881603	0.000910898	0.00096251
229.85	0.0164643	13.905	0.00588012	0.443283	0.0165088	1.97933e-09	0.00139542			9.21938e-07	1.26479e-06	1.72258e-06	2.32911e-06	3.12641e-06	4.16627e-06	5.51185e-06	7.23924e-06	9.43921e-06	1.22187e-05	1.57022e-05	2.00329e-05	2.53731e-05	3.19043e-05	3.98264e-05	4.93561e-05	6.07235e-05	7.41684e-05	8.99349e-05	0.000108264	0.000129386	0.00015351	0.000180814	0.000211434	0.000245451	0.000282879	0.000323656	0.000367631	0.000414561	0.0004641	0.000515799	0.000569111	0.000623389	0.000677905	0.000731855	0.000784382	0.000834597	0.000881603	0.000924519	0.00094833
231	0.0175309	14.2857	0.00545369	0.411136	0.0175189	1.45106e-10	0.0013924			9.21938e-07	1.26479e-06	1.72258e-06	2.32911e-06	3.12641e-06	4.16627e-06	5.51185e-06	7.23924e-06	9.43921e-06	1.22187e-05	1.57022e-05	2.00329e-05	2.53731e-05	3.19043e-05	3.98264e-05	4.93561e-05	6.07235e-05	7.41684e-05	8.99349e-05	0.000108264	0.000129386	0.00015351	0.000180814	0.000211434	0.000245451	0.000282879	0.000323656	0.000367631	0.000414561	0.0004641	0.000515799	0.000569111	0.000623389	0.000677905	0.000731855	0.000784382	0.000834597	0.000881603	0.000924519	0.00096251
232.15	0.0186724	14.6879	0.00552107	0.416216	0.0185576	1.31698e-08	0.00143073			9.21938e-07	1.26479e-06	1.72258e-06	2.32911e-06	3.12641e-06	4.16627e-06	5.51185e-06	7.23924e-06	9.43921e-06	1.22187e-05	1.57022e-05	2.00329e-05	2.53731e-05	3.19043e-05	3.98264e-05	4.93561e-05	6.07235e-05	7.41684e-05	8.99349e-05	0.000108264	0.000129386	0.00015351	0.000180814	0.000211434	0.000245451	0.000282879	0.000323656	0.000367631	0.000414561	0.0004641	0.000515799	0.000569111	0.000623389	0.000677905	0.000731855	0.000784382	0.000834597	0.000881603	0.000924519	0.00096251
233.3	0.0198551	15.1134	0.00540287	0.407305	0.0195711	8.06083e-08	0.00144408			9.21938e-07	1.26479e-06	1.72258e-06	2.32911e-06	3.12641e-06	4.16627e-06	5.51185e-06	7.23924e-06	9.43921e-06	1.22187e-05	1.57022e-05	2.00329e-05	2.53731e-05	3.19043e-05	3.98264e-05	4.93561e-05	6.07235e-05	7.41684e-05	8.99349e-05	0.000108264	0.000129386	0.00015351	0.000180814	0.000211434	0.000245451	0.000282879	0.000323656	0.000367631	0.000414561	0.0004641	0.000515799	0.000569111	0.000623389	0.000677905	0.000731855	0.000784382	0.000834597	0.000881603	0.000924519	0.00096251
234.45	0.0209947	15.5642	0.00490923	0.370091	0.0205777	1.73902e-07	0.00146576			9.21938e-07	1.26479e-06	1.72258e-06	2.32911e-06	3.12641e-06	4.16627e-06	5.51185e-06	7.23924e-06	9.43921e-06	1.22187e-05	1.57022e-05	2.00329e-05	2.53731e-05	3.19043e-05	3.98264e-05	4.93561e-05	6.07235e-05	7.41684e-05	8.99349e-05	0.000108264	0.000129386	0.00015351	0.000180814	0.000211434	0.000245451	0.000282879	0.000323656	0.000367631	0.000414561	0.0004641	0.000515799	0.000569111	0.000623389	0.000677905	0.000731855	0.000784382	0.000834597	0.000881603	0.000924519	0.00096251
235.6	0.0222445	16.0428	0.00506692	0.381979	0.0215593	4.69491e-07	0.00147927			9.21938e-07	1.26479e-06	1.72258e-06	2.32911e-06	3.12641e-06	4.16627e-06	5.51185e-06	7.23924e-06	9.43921e-06	1.22187e-05	1.57022e-05	2.00329e-05	2.53731e-05	3.19043e-05	3.98264e-05	4.93561e-05	6.07235e-05	7.41684e-05	8.99349e-05	0.000108264	0.000129386	0.00015351	0.000180814	0.000211434	0.000245451	0.000282879	0.000323656	0.000367631	0.000414561	0.0004641	0.000515799	0.000569111	0.000623389	0.000677905	0.000731855	0.000784382	0.000834597	0.000881603	0.000924519	0.00096251
236.75	0.0235987	16.5517	0.00515811	0.388853	0.0225304	1.1413e-06	0.0015017			9.21938e-07	1.26479e-06	1.72258e-06	2.32911e-06	3.12641e-06	4.16627e-06	5.51185e-06	7.23924e-06	9.43921e-06	1.22187e-05	1.57022e-05	2.00329e-05	2.53731e-05	3.19043e-05	3.98264e-05	4.93561e-05	6.07235e-05	7.41684e-05	8.99349e-05	0.000108264	0.000129386	0.00015351	0.000180814	0.000211434	0.000245451	0.000282879	0.000323656	0.000367631	0.000414561	0.0004641	0.000515799	0.000569111	0.000623389	0.000677905	0.000731855	0.000784382	0.000834597	0.000881603	0.000924519	0.00096251
237.9	0.0249639	17.094	0.00487507	0.367516	0.0235278	2.06229e-06	0.0015271			9.21938e-07	1.26479e-06	1.72258e-06	2.32911e-06	3.12641e-06	4.16627e-06	5.51185e-06	7.23924e-06	9.43921e-06	1.22187e-05	1.57022e-05	2.00329e-05	2.53731e-05	3.19043e-05	3.98264e-05	4.93561e-05	6.07235e-05	7.41684e-05	8.99349e-05	0.000108264	0.000129386	0.00015351	0.000180814	0.000211434	0.000245451	0.000282879	0.000323656	0.000367631	0.000414561	0.0004641	0.000515799	0.000569111	0.000623389	0.000677905	0.000731855	0.000784382	0.000834597	0.000881603	0.000924519	0.00096251
239.05	0.0262966	17.673	0.0044526	0.335667	0.024796	2.25188e-06	0.00155524			9.21938e-07	1.26479e-06	1.72258e-06	2.32911e-06	3.12641e-06	4.16627e-06	5.51185e-06	7.23924e-06	9.43921e-06	1.22187e-05	1.57022e-05	2.00329e-05	2.53731e-05	3.19043e-05	3.98264e-05	4.93561e-05	6.07235e-05	7.41684e-05	8.99349e-05	0.000108264	0.000129386	0.00015351	0.000180814	0.000211434	0.000245451	0.000282879	0.000323656	0.000367631	0.000414561	0.0004641	0.000515799	0.000569111	0.000623389	0.000677905	0.000731855	0.000784382	0.000834597	0.000881603	0.000924519	0.00096251
240.2	0.0277851	18.2927	0.00464146	0.349905	0.0269304	7.30528e-07	0.00157012			9.21938e-07	1.26479e-06	1.72258e-06	2.32911e-06	3.12641e-06	4.16627e-06	5.51185e-06	7.23924e-06	9.43921e-06	1.22187e-05	1.57022e-05	2.00329e-05	2.53731e-05	3.19043e-05	3.98264e-05	4.93561e-05	6.07235e-05	7.41684e-05	8.99349e-05	0.000108264	0.000129386	0.00015351	0.000180814	0.000211434	0.000245451	0.000282879	0.000323656	0.000367631	0.000414561	0.0004641	0.000515799	0.000569111	0.000623389	0.000677905	0.000731855	0.000784382	0.000834597	0.000881603	0.000924519	0.00096251
241.35	0.0293609	18.9573	0.00457541	0.344926	0.0299854	3.90023e-07	0.00161387			9.21938e-07	1.26479e-06	1.72258e-06	2.32911e-06	3.12641e-06	4.16627e-06	5.51185e-06	7.23924e-06	9.43921e-06	1.22187e-05	1.57022e-05	2.00329e-05	2.53731e-05	3.19043e-05	3.98264e-05	4.93561e-05	6.07235e-05	7.41684e-05	8.99349e-05	0.000108264	0.000129386	0.00015351	0.000180814	0.000211434	0.000245451	0.000282879	0.000323656	0.000367631	0.000414561	0.0004641	0.000515799	0.000569111	0.000623389	0.000677905	0.000731855	0.000784382	0.000834597	0.000881603	0.000924519	0.00096251
242.5	0.0310233	19.6721	0.00448253	0.337923	0.0327259	2.89892e-06	0.0016285			9.21938e-07	1.26479e-06	1.72258e-06	2.32911e-06	3.12641e-06	4.16627e-06	5.51185e-06	7.23924e-06	9.43921e-06	1.22187e-05	1.57022e-05	2.00329e-05	2.53731e-05	3.19043e-05	3.98264e-05	4.93561e-05	6.07235e-05	7.41684e-05	8.99349e-05	0.000108264	0.000129386	0.00015351	0.000180814	0.000211434	0.000245451	0.000282879	0.000323656	0.000367631	0.000414561	0.0004641	0.000515799	0.000569111	0.000623389	0.000677905	0.000731855	0.000784382	0.000834597	0.000881603	0.000924519	0.00096251
243.65	0.0327103	20.4429	0.00421218	0.317542	0.03456	3.4215e-06	0.00168701			9.21938e-07	1.26479e-06	1.72258e-06	2.32911e-06	3.12641e-06	4.16627e-06	5.51185e-06	7.23924e-06	9.43921e-06	1.22187e-05	1.57022e-05	2.00329e-05	2.53731e-05	3.19043e-05	3.98264e-05	4.93561e-05	6.07235e-05	7.41684e-05	8.99349e-05	0.000108264	0.000129386	0.00015351	0.000180814	0.000211434	0.000245451	0.000282879	0.000323656	0.000367631	0.000414561	0.0004641	0.000515799	0.000569111	0.000623389	0.000677905	0.000731855	0.000784382	0.000834597	0.000881603	0.000924519	0.00096251
244.8	0.034627	21.2766	0.0044181	0.333066	0.035822	1.42798e-06	0.00172115			9.21938e-07	1.26479e-06	1.72258e-06	2.32911e-06	3.12641e-06	4.16627e-06	5.51185e-06	7.23924e-06	9.43921e-06	1.22187e-05	1.57022e-05	2.00329e-05	2.53731e-05	3.19043e-05	3.98264e-05	4.93561e-05	6.07235e-05	7.41684e-05	8.99349e-05	0.000108264	0.000129386	0.00015351	0.000180814	0.000211434	0.000245451	0.000282879	0.000323656	0.000367631	0.000414561	0.0004641	0.000515799	0.000569111	0.000623389	0.000677905	0.000731855	0.000784382	0.000834597	0.000881603	0.000924519	0.00096251
245.95	0.0367246	22.1811	0.00444885	0.335384	0.0369823	6.63909e-08	0.00177965			9.21938e-07	1.26479e-06	1.72258e-06	2.32911e-06	3.12641e-06	4.16627e-06	5.51185e-06	7.23924e-06	9.43921e-06	1.22187e-05	1.57022e-05	2.00329e-05	2.53731e-05	3.19043e-05	3.98264e-05	4.93561e-05	6.07235e-05	7.41684e-05	8.99349e-05	0.000108264	0.000129386	0.00015351	0.000180814	0.000211434	0.000245451	0.000282879	0.000323656	0.000367631	0.000414561	0.0004641	0.000515799	0.000569111	0.000623389	0.000677905	0.000731855	0.000784382	0.000834597	0.000881603	0.000924519	0.00096251
247.1	0.0390661	23.166	0.00455278	0.343219	0.0382263	7.05401e-07	0.00190266			9.21938e-07	1.26479e-06	1.72258e-06	2.32911e-06	3.12641e-06	4.16627e-06	5.51185e-06	7.23924e-06	9.43921e-06	1.22187e-05	1.57022e-05	2.00329e-05	2.53731e-05	3.19043e-05	3.98264e-05	4.93561e-05	6.07235e-05	7.41684e-05	8.99349e-05	0.000108264	0.000129386	0.00015351	0.000180814	0.000211434	0.000245451	0.000282879	0.000323656	0.000367631	0.000414561	0.0004641	0.000515799	0.000569111	0.000623389	0.000677905	0.000731855	0.000784382	0.000834597	0.000881603	0.000924519	0.00096251
248.25	0.041837	24.2424	0.00491976	0.370885	0.0396879	4.61854e-06	0.00219894			9.21938e-07	1.26479e-06	1.72258e-06	2.32911e-06	3.12641e-06	4.16627e-06	5.51185e-06	7.23924e-06	9.43921e-06	1.22187e-05	1.57022e-05	2.00329e-05	2.53731e-05	3.19043e-05	3.98264e-05	4.93561e-05	6.07235e-05	7.41684e-05	8.99349e-05	0.000108264	0.000129386	0.00015351	0.000180814	0.000211434	0.000245451	0.000282879	0.000323656	0.000367631	0.000414561	0.0004641	0.000515799	0.000569111	0.000623389	0.000677905	0.000731855	0.000784382	0.000834597	0.000881603	0.000924519	0.00096251
249.4	0.0465491	25.4237	0.00760718	0.573481	0.0428034	1.40305e-05	0.00457164			9.21938e-07	1.26479e-06	1.72258e-06	2.32911e-06	3.12641e-06	4.16627e-06	5.51185e-06	7.23924e-06	9.43921e-06	1.22187e-05	1.57022e-05	2.00329e-05	2.53731e-05	3.19043e-05	3.98264e-05	4.93561e-05	6.07235e-05	7.41684e-05	8.99349e-05	0.000108264	0.000129386	0.00015351	0.000180814	0.000211434	0.000245451	0.000282879	0.000323656	0.000367631	0.000414561	0.0004641	0.000515799	0.000569111	0.000623389	0.000677905	0.000731855	0.000784382	0.000834597	0.000881603	0.000924519	0.00096251
250.55	0.0517042	26.7261	0.00753089	0.567729	0.0532385	2.35417e-06	0.0169643			9.21938e-07	1.26479e-06	1.72258e-06	2.32911e-06	3.12641e-06	4.16627e-06	5.51185e-06	7.23924e-06	9.43921e-06	1.22187e-05	1.57022e-05	2.00329e-05	2.53731e-05	3.19043e-05	3.98264e-05	4.93561e-05	6.07235e-05	7.41684e-05	8.99349e-05	0.000108264	0.000129386	0.00015351	0.000180814	0.000211434	0.000245451	0.000282879	0.000323656	0.000367631	0.000414561	0.0004641	0.000515799	0.000569111	0.000623389	0.000677905	0.000731855	0.000784382	0.000834597	0.000881603	0.000924519	0.00096251
251.7	0.0558207	28.169	0.00541341	0.408099	0.0619114	3.70967e-05	0.0264899			9.21938e-07	1.26479e-06	1.72258e-06	2.32911e-06	3.12641e-06	4.16627e-06	5.51185e-06	7.23924e-06	9.43921e-06	1.22187e-05	1.57022e-05	2.00329e-05	2.53731e-05	3.19043e-05	3.98264e-05	4.93561e-05	6.07235e-05	7.41684e-05	8.99349e-05	0.000108264	0.000129386	0.00015351	0.000180814	0.000211434	0.000245451	0.000282879	0.000323656	0.000367631	0.000414561	0.0004641	0.000515799	0.000569111	0.000623389	0.000677905	0.000731855	0.000784382	0.000834597	0.000881603	0.000924519	0.00096251
252.85	0.0607802	29.7767	0.0058367	0.44001	0.0665927	3.37852e-05	0.0297996			9.21938e-07	1.26479e-06	1.72258e-06	2.32911e-06	3.12641e-06	4.16627e-06	5.51185e-06	7.23924e-06	9.43921e-06	1.22187e-05	1.57022e-05	2.00329e-05	2.53731e-05	3.19043e-05	3.98264e-05	4.93561e-05	6.07235e-05	7.41684e-05	8.99349e-05	0.000108264	0.000129386	0.00015351	0.000180814	0.000211434	0.000245451	0.000282879	0.000323656	0.000367631	0.000414561	0.0004641	0.000515799	0.000569111	0.000623389	0.000677905	0.000731855	0.000784382	0.000834597	0.000881603	0.000924519	0.00096251
254	0.0666047	31.5789	0.00609461	0.459453	0.0707531	1.72095e-05	0.0314756			9.21938e-07	1.26479e-06	1.72258e-06	2.32911e-06	3.12641e-06	4.16627e-06	5.51185e-06	7.23924e-06	9.43921e-06	1.22187e-05	1.57022e-05	2.00329e-05	2.53731e-05	3.19043e-05	3.98264e-05	4.93561e-05	6.07235e-05	7.41684e-05	8.99349e-05	0.000108264	0.000129386	0.00015351	0.000180814	0.000211434	0.000245451	0.000282879	0.000323656	0.000367631	0.000414561	0.0004641	0.000515799	0.000569111	0.000623389	0.000677905	0.000731855	0.000784382	0.000834597	0.000881603	0.000924519	0.00096251
255.15	0.0739178	33.6134	0.00675399	0.509161	0.0760666	4.61729e-06	0.0334213			9.21938e-07	1.26479e-06	1.72258e-06	2.32911e-06	3.12641e-06	4.16627e-06	5.51185e-06	7.23924e-06	9.43921e-06	1.22187e-05	1.57022e-05	2.00329e-05	2.53731e-05	3.19043e-05	3.98264e-05	4.93561e-05	6.07235e-05	7.41684e-05	8.99349e-05	0.000108264	0.000129386	0.00015351	0.000180814	0.000211434	0.000245451	0.000282879	0.000323656	0.000367631	0.000414561	0.0004641	0.000515799	0.000569111	0.000623389	0.000677905	0.000731855	0.000784382	0.000834597	0.000881603	0.000924519	0.00096251
256.3	0.0830463	35.9281	0.00737925	0.556297	0.0830722	6.7009e-10	0.0357373			9.21938e-07	1.26479e-06	1.72258e-06	2.32911e-06	3.12641e-06	4.16627e-06	5.51185e-06	7.23924e-06	9.43921e-06	1.22187e-05	1.57022e-05	2.00329e-05	2.53731e-05	3.19043e-05	3.98264e-05	4.93561e-05	6.07235e-05	7.41684e-05	8.99349e-05	0.000108264	0.000129386	0.00015351	0.000180814	0.000211434	0.000245451	0.000282879	0.000323656	0.000367631	0.000414561	0.0004641	0.000515799	0.000569111	0.000623389	0.000677905	0.000731855	0.000784382	0.000834597	0.000881603	0.000924519	0.00096251
257.45	0.0945553	38.5852	0.00806644	0.608103	0.0925824	3.89262e-06	0.0385606			9.21938e-07	1.26479e-06	1.72258e-06	2.32911e-06	3.12641e-06	4.16627e-06	5.51185e-06	7.23924e-06	9.43921e-06	1.22187e-05	1.57022e-05	2.00329e-05	2.53731e-05	3.19043e-05	3.98264e-05	4.93561e-05	6.07235e-05	7.41684e-05	8.99349e-05	0.000108264	0.000129386	0.00015351	0.000180814	0.000211434	0.000245451	0.000282879	0.000323656	0.000367631	0.000414561	0.0004641	0.000515799	0.000569111	0.000623389	0.000677905	0.000731855	0.000784382	0.000834597	0.000881603	0.000924519	0.00096251
258.6	0.109917	41.6667	0.00923278	0.696029	0.105786	1.70597e-05	0.0419927			9.21938e-07	1.26479e-06	1.72258e-06	2.32911e-06	3.12641e-06	4.16627e-06	5.51185e-06	7.23924e-06	9.43921e-06	1.22187e-05	1.57022e-05	2.00329e-05	2.53731e-05	3.19043e-05	3.98264e-05	4.93561e-05	6.07235e-05	7.41684e-05	8.99349e-05	0.000108264	0.000129386	0.00015351	0.000180814	0.000211434	0.000245451	0.000282879	0.000323656	0.000367631	0.000414561	0.0004641	0.000515799	0.000569111	0.000623389	0.000677905	0.000731855	0.000784382	0.000834597	0.000881603	0.000924519	0.00096251
259.75	0.130073	45.283	0.0102572	0.773256	0.124356	3.26866e-05	0.0461904			9.21938e-07	1.26479e-06	1.72258e-06	2.32911e-06	3.12641e-06	4.16627e-06	5.51185e-06	7.23924e-06	9.43921e-06	1.22187e-05	1.57022e-05	2.00329e-05	2.53731e-05	3.19043e-05	3.98264e-05	4.93561e-05	6.07235e-05	7.41684e-05	8.99349e-05	0.000108264	0.000129386	0.00015351	0.000180814	0.000211434	0.000245451	0.000282879	0.000323656	0.000367631	0.000414561	0.0004641	0.000515799	0.000569111	0.000623389	0.000677905	0.000731855	0.000784382	0.000834597	0.000881603	0.000924519	0.00096251
260.9	0.156368	49.5868	0.0111589	0.841237	0.15084	3.056e-05	0.0517453			9.21938e-07	1.26479e-06	1.72258e-06	2.32911e-06	3.12641e-06	4.16627e-06	5.51185e-06	7.23924e-06	9.43921e-06	1.22187e-05	1.57022e-05	2.00329e-05	2.53731e-05	3.19043e-05	3.98264e-05	4.93561e-05	6.07235e-05	7.41684e-05	8.99349e-05	0.000108264	0.000129386	0.00015351	0.000180814	0.000211434	0.000245451	0.000282879	0.000323656	0.000367631	0.000414561	0.0004641	0.000515799	0.000569111	0.000623389	0.000677905	0.000731855	0.000784382	0.000834597	0.000881603	0.000924519	0.00096251
262.05	0.192699	54.7945	0.0126264	0.951866	0.189231	1.20205e-05	0.0590102			9.21938e-07	1.26479e-06	1.72258e-06	2.32911e-06	3.12641e-06	4.16627e-06	5.51185e-06	7.23924e-06	9.43921e-06	1.22187e-05	1.57022e-05	2.00329e-05	2.53731e-05	3.19043e-05	3.98264e-05	4.93561e-05	6.07235e-05	7.41684e-05	8.99349e-05	0.000108264	0.000129386	0.00015351	0.000180814	0.000211434	0.000245451	0.000282879	0.000323656	0.000367631	0.000414561	0.0004641	0.000515799	0.000569111	0.000623389	0.000677905	0.000731855	0.000784382	0.000834597	0.000881603	0.000924519	0.00096251
263.2	0.24035	61.2245	0.0132649	1	0.245442	2.59281e-05	0.0685393			9.21938e-07	1.26479e-06	1.72258e-06	2.32911e-06	3.12641e-06	4.16627e-06	5.51185e-06	7.23924e-06	9.43921e-06	1.22187e-05	1.57022e-05	2.00329e-05	2.53731e-05	3.19043e-05	3.98264e-05	4.93561e-05	6.07235e-05	7.41684e-05	8.99349e-05	0.000108264	0.000129386	0.00015351	0.000180814	0.000211434	0.000245451	0.000282879	0.000323656	0.000367631	0.000414561	0.0004641	0.000515799	0.000569111	0.000623389	0.000677905	0.000731855	0.000784382	0.000834597	0.000881603	0.000924519	0.00096251
264.35	0.299588	69.3642	0.0128474	0.968526	0.308509	7.95946e-05	0.0815406			9.21938e-07	1.26479e-06	1.72258e-06	2.32911e-06	3.12641e-06	4.16627e-06	5.51185e-06	7.23924e-06	9.43921e-06	1.22187e-05	1.57022e-05	2.00329e-05	2.53731e-05	3.19043e-05	3.98264e-05	4.93561e-05	6.07235e-05	7.41684e-05	8.99349e-05	0.000108264	0.000129386	0.00015351	0.000180814	0.000211434	0.000245451	0.000282879	0.000323656	0.000367631	0.000414561	0.0004641	0.000515799	0.000569111	0.000623389	0.000677905	0.000731855	0.000784382	0.000834597	0.000881603	0.000924519	0.00096251
265.5	0.361996	80	0.0101752	0.767078	0.351254	0.000115386	0.0995985			9.21938e-07	1.26479e-06	1.72258e-06	2.32911e-06	3.12641e-06	4.16627e-06	5.51185e-06	7.23924e-06	9.43921e-06	1.22187e-05	1.57022e-05	2.00329e-05	2.53731e-05	3.19043e-05	3.98264e-05	4.93561e-05	6.07235e-05	7.41684e-05	8.99349e-05	0.000108264	0.000129386	0.00015351	0.000180814	0.000211434	0.000245451	0.000282879	0.000323656	0.000367631	0.000414561	0.0004641	0.000515799	0.000569111	0.000623389	0.000677905	0.000731855	0.000784382	0.000834597	0.000881603	0.000924519	0.00096251
266.65	0.404828	94.4882	0.00500602	0.377388	0.377029	0.000772743	0.124944			9.21938e-07	1.26479e-06	1.72258e-06	2.32911e-06	3.12641e-06	4.16627e-06	5.51185e-06	7.23924e-06	9.43921e-06	1.22187e-05	1.57022e-05	2.00329e-05	2.53731e-05	3.19043e-05	3.98264e-05	4.93561e-05	6.07235e-05	7.41684e-05	8.99349e-05	0.000108264	0.000129386	0.00015351	0.000180814	0.000211434	0.000245451	0.000282879	0.000323656	0.000367631	0.000414561	0.0004641	0.000515799	0.000569111	0.000623389	0.000677905	0.000731855	0.000784382	0.000834597	0.000881603	0.000924519	0.00096251
267.8	0.418206	115.385	0.00104852	0.0790447	0.405086	0.00017212	0.161437			9.21938e-07	1.26479e-06	1.72258e-06	2.32911e-06	3.12641e-06	4.16627e-06	5.51185e-06	7.23924e-06	9.43921e-06	1.22187e-05	1.57022e-05	2.00329e-05	2.53731e-05	3.19043e-05	3.98264e-05	4.93561e-05	6.07235e-05	7.41684e-05	8.99349e-05	0.000108264	0.000129386	0.00015351	0.000180814	0.000211434	0.000245451	0.000282879	0.000323656	0.000367631	0.000414561	0.0004641	0.000515799	0.000569111	0.000623389	0.000677905	0.000731855	0.000784382	0.000834597	0.000881603	0.000924519	0.00096251
268.95	0.435582	148.148	0.000826113	0.062278	0.44463	8.1871e-05	0.215404			9.21938e-07	1.26479e-06	1.72258e-06	2.32911e-06	3.12641e-06	4.16627e-06	5.51185e-06	7.23924e-06	9.43921e-06	1.22187e-05	1.57022e-05	2.00329e-05	2.53731e-05	3.19043e-05	3.98264e-05	4.93561e-05	6.07235e-05	7.41684e-05	8.99349e-05	0.000108264	0.000129386	0.00015351	0.000180814	0.000211434	0.000245451	0.000282879	0.000323656	0.000367631	0.000414561	0.0004641	0.000515799	0.000569111	0.000623389	0.000677905	0.000731855	0.000784382	0.000834597	0.000881603	0.000924519	0.00096251
270.1	0.468124	206.897	0.000793284	0.0598031	0.50071	0.00106184	0.293189			9.21938e-07	1.26479e-06	1.72258e-06	2.32911e-06	3.12641e-06	4.16627e-06	5.51185e-06	7.23924e-06	9.43921e-06	1.22187e-05	1.57022e-05	2.00329e-05	2.53731e-05	3.19043e-05	3.98264e-05	4.93561e-05	6.07235e-05	7.41684e-05	8.99349e-05	0.000108264	0.000129386	0.00015351	0.000180814	0.000211434	0.000245451	0.000282879	0.000323656	0.000367631	0.000414561	0.0004641	0.000515799	0.000569111	0.000623389	0.000677905	0.000731855	0.000784382	0.000834597	0.000881603	0.000924519	0.00096251
271.25	0.552605	342.857	0.000749921	0.0565341	0.582237	0.000878048	0.40655			9.21938e-07	1.26479e-06	1.72258e-06	2.32911e-06	3.12641e-06	4.16627e-06	5.51185e-06	7.23924e-06	9.43921e-06	1.22187e-05	1.57022e-05	2.00329e-05	2.53731e-05	3.19043e-05	3.98264e-05	4.93561e-05	6.07235e-05	7.41684e-05	8.99349e-05	0.000108264	0.000129386	0.00015351	0.000180814	0.000211434	0.000245451	0.000282879	0.000323656	0.000367631	0.000414561	0.0004641	0.000515799	0.000569111	0.000623389	0.000677905	0.000731855	0.000784382	0.000834597	0.000881603	0.000924519	0.00096251
272.4	0.712835	1000	0.000167197	0.0126044	0.695636	0.000295798	0.563467			9.21938e-07	1.26479e-06	1.72258e-06	2.32911e-06	3.12641e-06	4.16627e-06	5.51185e-06	7.23924e-06	9.43921e-06	1.22187e-05	1.57022e-05	2.00329e-05	2.53731e-05	3.19043e-05	3.98264e-05	4.93561e-05	6.07235e-05	7.41684e-05	8.99349e-05	0.000108264	0.000129386	0.00015351	0.000180814	0.000211434	0.000245451	0.000282879	0.000323656	0.000367631	0.000414561	0.0004641	0.000515799	0.000569111	0.000623389	0.000677905	0.000731855	0.000784382	0.000834597	0.000881603	0.000924519	0.00096251
273.55	0.945283	-1090.91	0.000203813	0.0153648	0.931077	0.000201801	0.893342			9.21938e-07	1.26479e-06	1.72258e-06	2.32911e-06	3.12641e-06	4.16627e-06	5.51185e-06	7.23924e-06	9.43921e-06	1.22187e-05	1.57022e-05	2.00329e-05	2.53731e-05	3.19043e-05	3.98264e-05	4.93561e-05	6.07235e-05	7.41684e-05	8.99349e-05	0.000108264	0.000129386	0.00015351	0.000180814	0.000211434	0.000245451	0.000282879	0.000323656	0.000367631	0.000414561	0.0004641	0.000515799	0.000569111	0.000623389	0.000677905	0.000731855	0.000784382	0.000834597	0.000881603	0.000924519	0.00096251
274.7	1	-352.941	0.000458358	0.0345541	1.00695	4.83698e-05	1			9.21938e-07	1.26479e-06	1.72258e-06	2.32911e-06	3.12641e-06	4.16627e-06	5.51185e-06	7.23924e-06	9.43921e-06	1.22187e-05	1.57022e-05	2.00329e-05	2.53731e-05	3.19043e-05	3.98264e-05	4.93561e-05	6.07235e-05	7.41684e-05	8.99349e-05	0.000108264	0.000129386	0.00015351	0.000180814	0.000211434	0.000245451	0.000282879	0.000323656	0.000367631	0.000414561	0.0004641	0.000515799	0.000569111	0.000623389	0.000677905	0.000731855	0.000784382	0.000834597	0.000881603	0.000924519	0.00096251
275.85	0.99859	-210.526	-3.32052e-05	-0.00250323	0.996538	4.21054e-06	0.985267			9.21938e-07	1.26479e-06	1.72258e-06	2.32911e-06	3.12641e-06	4.16627e-06	5.51185e-06	7.23924e-06	9.43921e-06	1.22187e-05	1.57022e-05	2.00329e-05	2.53731e-05	3.19043e-05	3.98264e-05	4.93561e-05	6.07235e-05	7.41684e-05	8.99349e-05	0.000108264	0.000129386	0.00015351	0.000180814	0.000211434	0.000245451	0.000282879	0.000323656	0.000367631	0.000414561	0.0004641	0.000515799	0.000569111	0.000623389	0.000677905	0.000731855	0.000784382	0.000834597	0.000881603	0.000924519	0.00096251
[truncated: 40 more columns]
