# Supplementary material for: Melting of aqueous NaCl solutions in porous materials: shifted phase transition distribution (SIDI) approach for determining NMR cryoporometry pore size distributions
Source: Royal Society of Chemistry journal article supplement (doi:10.1039/d3cp04029a), 2023-12-27
Supplement: d3cp04029a4.xlsx [file d3cp04029a4.xlsx]

## Sheet: Sheet1
Add measurement temperatures both to column A and row 19; measured signal intensities to column B; and saline intensities to column E
Use solver to minimize Diffsqusum (orange box), by letting parameters in yellow box to vary
										Melting point distribution is assumed to be a sum of three Gaussian distrubutions
						Diffsqusum				A1	A2	A3	Amplitude
						0.0142573				0.379147	0.197566	0.114398
										Tmp 1	Tmp 2	Tmp 3	Mean melting temperature
						k (KÅ)				275.763	260.336	240.067
						300				Sigma 1	Sigma 2	Sigma 3	Width of distribution
						T0 (K)				0.238458	1.92382	14.0201
						273
							Mean pore diameter		Dm (Å)	21.042
									D*PSDN	0.0108473	0.0147253	0.0198522	0.0265799	0.0353423	0.0466695	0.0612017	0.0797049	0.103085	0.132401	0.168876	0.213907	0.269067	0.3361	0.416914	0.513561	0.628204	0.763078	0.920434	1.10247	1.31126	1.54865	1.81615	2.11488	2.44537	2.80753	3.2005	3.62259	4.07119	4.54274	5.03268	5.53552	6.04485	6.55347	7.05353	7.53666	7.99425	8.41763	8.79836	9.12849
							Pore diameter		D (Å)	6.81818	6.90846	7.00117	7.09639	7.19424	7.29483	7.39827	7.50469	7.61421	7.72698	7.84314	7.96284	8.08625	8.21355	8.34492	8.48057	8.62069	8.76552	8.9153	9.07029	9.23077	9.39702	9.56938	9.74817	9.93377	10.1266	10.327	10.5356	10.7527	10.979	11.215	11.4613	11.7187	11.988	12.2699	12.5654	12.8755	13.2013	13.544	13.905
					Max	0.027138	Pore size distribution		PSD	4.31748e-05	5.78443e-05	7.69513e-05	0.000101647	0.000133318	0.000173618	0.000224497	0.000288224	0.000367407	0.000465006	0.000584327	0.000729014	0.000903006	0.00111049	0.00135582	0.00164341	0.00197759	0.00236249	0.00280178	0.00329856	0.00385504	0.0044724	0.00515048	0.00588763	0.00668049	0.00752383	0.00841048	0.00933125	0.010275	0.0112288	0.0121781	0.013107	0.0139985	0.0148355	0.0156006	0.0162772	0.0168496	0.0173042	0.0176292	0.0178158
					Sum	21.9739	Normalized PSD		PSDN	0.00159093	0.00213148	0.00283555	0.00374555	0.00491258	0.00639761	0.00827243	0.0106207	0.0135385	0.0171348	0.0215317	0.0268632	0.0332746	0.0409201	0.0499602	0.0605574	0.0728717	0.0870545	0.103242	0.121547	0.142053	0.164802	0.189788	0.216951	0.246167	0.277243	0.309915	0.343844	0.378621	0.413768	0.448747	0.482974	0.515827	0.546669	0.574863	0.599793	0.620887	0.637635	0.649612	0.65649
							Sum D1	0.682271	MP D1	0	0	0	0	0	0	0	0	0	0	0	0	0	0	0	0	0	0	0	0	0	0	0	0	0	0	0	0	0	0	0	0	0	0	0	0	0	0	0	0
Tstep			Max				Sum D2	0.197566	MP D2	0	0	0	3.01076e-305	1.26405e-295	3.71252e-286	7.62757e-277	1.09627e-267	1.1022e-258	7.75212e-250	3.8141e-241	1.31274e-232	3.16066e-224	5.32343e-216	6.27218e-208	5.16963e-200	2.98067e-192	1.20221e-184	3.39206e-177	6.69513e-170	9.24418e-163	8.92876e-156	6.03293e-149	2.85153e-142	9.4285e-136	2.18082e-129	3.52868e-123	3.99409e-117	3.16254e-111	1.75174e-105	6.78759e-100	1.83982e-94	3.48859e-89	4.6274e-84	4.29377e-79	2.78711e-74	1.26556e-69	4.01999e-65	8.93266e-61	1.38852e-56
1.15			0.0197594				Sum D3	0.113852	MP D3	1.67258e-06	2.3006e-06	3.14323e-06	4.26567e-06	5.75013e-06	7.69919e-06	1.02398e-05	1.35274e-05	1.77508e-05	2.31364e-05	2.9954e-05	3.85204e-05	4.92044e-05	6.24304e-05	7.86803e-05	9.8495e-05	0.000122473	0.000151267	0.000185578	0.000226144	0.000273731	0.000329109	0.000393037	0.000466236	0.000549358	0.000642959	0.000747463	0.000863125	0.000990001	0.00112791	0.00127642	0.00143479	0.001602	0.00177671	0.00195725	0.00214168	0.00232777	0.00251307	0.00269492	0.00287056
			Conventional						MP Dtot	1.67258e-06	2.3006e-06	3.14323e-06	4.26567e-06	5.75013e-06	7.69919e-06	1.02398e-05	1.35274e-05	1.77508e-05	2.31364e-05	2.9954e-05	3.85204e-05	4.92044e-05	6.24304e-05	7.86803e-05	9.8495e-05	0.000122473	0.000151267	0.000185578	0.000226144	0.000273731	0.000329109	0.000393037	0.000466236	0.000549358	0.000642959	0.000747463	0.000863125	0.000990001	0.00112791	0.00127642	0.00143479	0.001602	0.00177671	0.00195725	0.00214168	0.00232777	0.00251307	0.00269492	0.00287056
T (K)	Meas	D (Å)	PSD	PSDN	Fit	Diffsqu	Saline		T (K)	185	186.15	187.3	188.45	189.6	190.75	191.9	193.05	194.2	195.35	196.5	197.65	198.8	199.95	201.1	202.25	203.4	204.55	205.7	206.85	208	209.15	210.3	211.45	212.6	213.75	214.9	216.05	217.2	218.35	219.5	220.65	221.8	222.95	224.1	225.25	226.4	227.55	228.7	229.85
185	0.00127693	6.81818			0.00106601	4.44851e-08	0.000916993			1.64794e-06	2.3006e-06	2.80798e-06	2.40356e-06	2.33771e-06	2.25732e-06	2.20569e-06	2.18383e-06	2.21785e-06	2.30435e-06	2.44247e-06	2.64016e-06	2.90357e-06	3.23048e-06	3.63428e-06	4.13607e-06	4.72262e-06	5.40587e-06	6.20224e-06	7.11803e-06	8.15708e-06	8.71807e-06	6.66762e-06	2.13146e-06	1.208e-06	1.22333e-06	1.33022e-06	1.48557e-06	1.67014e-06	1.8368e-06	2.05998e-06	2.25279e-06	2.49149e-06	2.7132e-06	2.9392e-06	3.16812e-06	3.41195e-06	3.62906e-06	3.8557e-06	3.99698e-06
186.15	0.00125849	6.90846	-0.00040309	-0.0203999	0.00110055	2.49449e-08	0.000927856			1.67258e-06	2.26671e-06	3.14323e-06	3.8107e-06	3.24001e-06	3.13011e-06	3.00219e-06	2.91386e-06	2.86563e-06	2.89076e-06	2.98337e-06	3.14097e-06	3.37244e-06	3.68403e-06	4.07133e-06	4.54953e-06	5.14297e-06	5.83294e-06	6.63205e-06	7.55803e-06	8.61584e-06	9.80732e-06	1.04115e-05	7.90938e-06	2.51147e-06	1.41383e-06	1.42217e-06	1.53606e-06	1.70394e-06	1.9028e-06	2.07865e-06	2.31557e-06	2.51533e-06	2.7632e-06	2.98891e-06	3.21616e-06	3.44341e-06	3.68356e-06	3.89167e-06	4.10699e-06
187.3	0.00135496	7.00117	0.00205373	0.103937	0.00114477	4.41799e-08	0.000944597			1.67258e-06	2.3006e-06	3.09692e-06	4.26567e-06	5.13683e-06	4.33824e-06	4.16299e-06	3.96609e-06	3.82358e-06	3.73509e-06	3.74257e-06	3.83657e-06	4.01216e-06	4.27893e-06	4.64294e-06	5.09665e-06	5.65708e-06	6.3521e-06	7.15598e-06	8.0818e-06	9.14843e-06	1.03589e-05	1.17124e-05	1.23506e-05	9.3195e-06	2.93938e-06	1.64362e-06	1.64223e-06	1.76186e-06	1.94131e-06	2.15333e-06	2.33656e-06	2.58543e-06	2.78963e-06	3.04398e-06	3.27055e-06	3.49561e-06	3.71751e-06	3.95011e-06	4.1453e-06
188.45	0.00139039	7.09639	0.000734078	0.0371508	0.00118865	4.06983e-08	0.000951005			1.67258e-06	2.3006e-06	3.14323e-06	4.20283e-06	5.75013e-06	6.87801e-06	5.76978e-06	5.49957e-06	5.20432e-06	4.98368e-06	4.83569e-06	4.81288e-06	4.90069e-06	5.09061e-06	5.39269e-06	5.81221e-06	6.33739e-06	6.98708e-06	7.79291e-06	8.72025e-06	9.78241e-06	1.09992e-05	1.23711e-05	1.38937e-05	1.45525e-05	1.09074e-05	3.41713e-06	1.89796e-06	1.88364e-06	2.00729e-06	2.19692e-06	2.42051e-06	2.60886e-06	2.86737e-06	3.0731e-06	3.33081e-06	3.55473e-06	3.77388e-06	3.98652e-06	4.20755e-06
189.6	0.0014316	7.19424	0.000830856	0.0420486	0.00124045	3.65361e-08	0.000957435			1.67258e-06	2.3006e-06	3.14323e-06	4.26567e-06	5.66541e-06	7.69919e-06	9.14763e-06	7.62225e-06	7.21657e-06	6.78335e-06	6.4522e-06	6.21862e-06	6.14779e-06	6.21797e-06	6.41564e-06	6.75077e-06	7.22715e-06	7.82735e-06	8.57192e-06	9.49641e-06	1.05552e-05	1.17615e-05	1.31358e-05	1.4675e-05	1.63707e-05	1.7032e-05	1.26802e-05	3.9459e-06	2.17695e-06	2.14604e-06	2.27158e-06	2.4695e-06	2.70259e-06	2.89336e-06	3.15874e-06	3.36268e-06	3.62023e-06	3.8377e-06	4.04697e-06	4.24634e-06
190.75	0.00147184	7.29483	0.000789023	0.0399315	0.00130726	2.70847e-08	0.000971953			1.67258e-06	2.3006e-06	3.14323e-06	4.26567e-06	5.75013e-06	7.58576e-06	1.02398e-05	1.20846e-05	1.0002e-05	9.40612e-06	8.78217e-06	8.29743e-06	7.94343e-06	7.8003e-06	7.83644e-06	8.03134e-06	8.3942e-06	8.92629e-06	9.60277e-06	1.04457e-05	1.14947e-05	1.26906e-05	1.40461e-05	1.55822e-05	1.72914e-05	1.916e-05	1.98002e-05	1.46423e-05	4.52593e-06	2.48021e-06	2.4286e-06	2.55343e-06	2.7573e-06	2.99732e-06	3.18737e-06	3.45639e-06	3.65487e-06	3.90841e-06	4.11541e-06	4.31072e-06
191.9	0.00152123	7.39827	0.000941637	0.0476551	0.0013779	2.05424e-08	0.000975278			1.67258e-06	2.3006e-06	3.14323e-06	4.26567e-06	5.75013e-06	7.69919e-06	1.00889e-05	1.35274e-05	1.58575e-05	1.30366e-05	1.21778e-05	1.12937e-05	1.05988e-05	1.00786e-05	9.83062e-06	9.80995e-06	9.98651e-06	1.03677e-05	1.0951e-05	1.17019e-05	1.26437e-05	1.38202e-05	1.51557e-05	1.6662e-05	1.83603e-05	2.02375e-05	2.22741e-05	2.28641e-05	1.67947e-05	5.15641e-06	2.80677e-06	2.72993e-06	2.85101e-06	3.05799e-06	3.30189e-06	3.48771e-06	3.75672e-06	3.9458e-06	4.19124e-06	4.38362e-06
193.05	0.00159188	7.50469	0.00130893	0.0662434	0.00146945	1.49893e-08	0.000989139			1.67258e-06	2.3006e-06	3.14323e-06	4.26567e-06	5.75013e-06	7.69919e-06	1.02398e-05	1.33281e-05	1.77508e-05	2.06688e-05	1.68781e-05	1.56605e-05	1.44262e-05	1.34477e-05	1.27019e-05	1.23063e-05	1.21981e-05	1.23344e-05	1.27194e-05	1.33448e-05	1.41643e-05	1.52017e-05	1.65047e-05	1.79783e-05	1.96326e-05	2.14885e-05	2.35268e-05	2.57208e-05	2.62251e-05	1.91343e-05	5.83533e-06	3.15502e-06	3.04807e-06	3.16192e-06	3.36873e-06	3.61302e-06	3.79077e-06	4.05576e-06	4.23134e-06	4.46439e-06
194.2	0.00167688	7.61421	0.00152991	0.0774269	0.00157357	1.06737e-08	0.000997818			1.67258e-06	2.3006e-06	3.14323e-06	4.26567e-06	5.75013e-06	7.69919e-06	1.02398e-05	1.35274e-05	1.74892e-05	2.31364e-05	2.67591e-05	2.17049e-05	2.00041e-05	1.83039e-05	1.6948e-05	1.59008e-05	1.53022e-05	1.5066e-05	1.51321e-05	1.54998e-05	1.61529e-05	1.70298e-05	1.81546e-05	1.95785e-05	2.11836e-05	2.29777e-05	2.49812e-05	2.71674e-05	2.95017e-05	2.98783e-05	2.16536e-05	6.55936e-06	3.5227e-06	3.38047e-06	3.48322e-06	3.68616e-06	3.92696e-06	4.09252e-06	4.34925e-06	4.50711e-06
195.35	0.00180802	7.72698	0.00229188	0.115989	0.00169434	1.29214e-08	0.00100341			1.67258e-06	2.3006e-06	3.14323e-06	4.26567e-06	5.75013e-06	7.69919e-06	1.02398e-05	1.35274e-05	1.77508e-05	2.27956e-05	2.9954e-05	3.44119e-05	2.77251e-05	2.53811e-05	2.30682e-05	2.12162e-05	1.97717e-05	1.88999e-05	1.84833e-05	1.84399e-05	1.87613e-05	1.94208e-05	2.03378e-05	2.15356e-05	2.3069e-05	2.47929e-05	2.67123e-05	2.88467e-05	3.11609e-05	3.36114e-05	3.38123e-05	2.43403e-05	7.32379e-06	3.90686e-06	3.72398e-06	3.81144e-06	4.00645e-06	4.23956e-06	4.38867e-06	4.63271e-06
196.5	0.00197255	7.84314	0.00279091	0.141245	0.00184248	1.69163e-08	0.00101701			1.67258e-06	2.3006e-06	3.14323e-06	4.26567e-06	5.75013e-06	7.69919e-06	1.02398e-05	1.35274e-05	1.77508e-05	2.31364e-05	2.95127e-05	3.85204e-05	4.39564e-05	3.51775e-05	3.19875e-05	2.88776e-05	2.63811e-05	2.44201e-05	2.31868e-05	2.25236e-05	2.23202e-05	2.25569e-05	2.31932e-05	2.41255e-05	2.53751e-05	2.69996e-05	2.88226e-05	3.08458e-05	3.30871e-05	3.55017e-05	3.80368e-05	3.80076e-05	2.7177e-05	8.12246e-06	4.30386e-06	4.07489e-06	4.14262e-06	4.32538e-06	4.54635e-06	4.67469e-06
197.65	0.00219829	7.96284	0.00371497	0.18801	0.00201747	3.26944e-08	0.00103228			1.67258e-06	2.3006e-06	3.14323e-06	4.26567e-06	5.75013e-06	7.69919e-06	1.02398e-05	1.35274e-05	1.77508e-05	2.31364e-05	2.9954e-05	3.79529e-05	4.92044e-05	5.57717e-05	4.43337e-05	4.00431e-05	3.59077e-05	3.25834e-05	2.99592e-05	2.82553e-05	2.72632e-05	2.68357e-05	2.69385e-05	2.75127e-05	2.84267e-05	2.96986e-05	3.1388e-05	3.32826e-05	3.538e-05	3.76963e-05	4.01761e-05	4.27563e-05	4.2437e-05	3.01407e-05	8.94783e-06	4.70941e-06	4.42896e-06	4.47238e-06	4.63838e-06	4.84265e-06
198.8	0.00247383	8.08625	0.00439727	0.22254	0.00221529	6.68442e-08	0.00103677			1.67258e-06	2.3006e-06	3.14323e-06	4.26567e-06	5.75013e-06	7.69919e-06	1.02398e-05	1.35274e-05	1.77508e-05	2.31364e-05	2.9954e-05	3.85204e-05	4.84795e-05	6.24304e-05	7.02884e-05	5.54986e-05	4.97913e-05	4.43497e-05	3.99741e-05	3.65081e-05	3.4201e-05	3.27788e-05	3.20485e-05	3.19555e-05	3.24178e-05	3.32701e-05	3.45256e-05	3.62449e-05	3.8175e-05	4.03086e-05	4.26596e-05	4.5161e-05	4.77391e-05	4.70649e-05	3.32034e-05	9.79097e-06	5.11862e-06	4.78152e-06	4.79602e-06	4.94067e-06
199.95	0.00281801	8.21355	0.00532359	0.26942	0.00245035	1.35174e-07	0.00104438			1.67258e-06	2.3006e-06	3.14323e-06	4.26567e-06	5.75013e-06	7.69919e-06	1.02398e-05	1.35274e-05	1.77508e-05	2.31364e-05	2.9954e-05	3.85204e-05	4.92044e-05	6.15106e-05	7.86803e-05	8.79897e-05	6.90094e-05	6.14975e-05	5.44093e-05	4.87123e-05	4.41904e-05	4.11201e-05	3.91459e-05	3.80171e-05	3.76526e-05	3.79412e-05	3.86777e-05	3.98681e-05	4.15728e-05	4.3493e-05	4.56158e-05	4.79527e-05	5.0424e-05	5.29452e-05	5.18474e-05	3.63321e-05	1.06417e-05	5.52607e-06	5.12752e-06	5.10859e-06
201.1	0.00325494	8.34492	0.00654706	0.331339	0.00272834	2.77303e-07	0.0010558			1.67258e-06	2.3006e-06	3.14323e-06	4.26567e-06	5.75013e-06	7.69919e-06	1.02398e-05	1.35274e-05	1.77508e-05	2.31364e-05	2.9954e-05	3.85204e-05	4.92044e-05	6.24304e-05	7.75211e-05	9.8495e-05	0.00010941	8.52339e-05	7.54466e-05	6.6303e-05	5.89626e-05	5.31305e-05	4.91076e-05	4.64364e-05	4.4795e-05	4.4068e-05	4.4108e-05	4.46626e-05	4.57286e-05	4.73641e-05	4.92195e-05	5.12757e-05	5.3541e-05	5.59229e-05	5.83253e-05	5.67329e-05	3.94891e-05	1.14888e-05	5.92596e-06	5.4617e-06
202.25	0.00375374	8.48057	0.00723709	0.36626	0.003047	4.99486e-07	0.00105956			1.67258e-06	2.3006e-06	3.14323e-06	4.26567e-06	5.75013e-06	7.69919e-06	1.02398e-05	1.35274e-05	1.77508e-05	2.31364e-05	2.9954e-05	3.85204e-05	4.92044e-05	6.24304e-05	7.86803e-05	9.70439e-05	0.000122473	0.000135133	0.000104567	9.1939e-05	8.02548e-05	7.08913e-05	6.34509e-05	5.82533e-05	5.47152e-05	5.24273e-05	5.12306e-05	5.09332e-05	5.12279e-05	5.20988e-05	5.36003e-05	5.53265e-05	5.72514e-05	5.93798e-05	6.16055e-05	6.38212e-05	6.16625e-05	4.26325e-05	1.23202e-05	6.31217e-06
203.4	0.00432835	8.62069	0.00806815	0.408319	0.00342794	8.1075e-07	0.00107819			1.67258e-06	2.3006e-06	3.14323e-06	4.26567e-06	5.75013e-06	7.69919e-06	1.02398e-05	1.35274e-05	1.77508e-05	2.31364e-05	2.9954e-05	3.85204e-05	4.92044e-05	6.24304e-05	7.86803e-05	9.8495e-05	0.000120669	0.000151267	0.000165784	0.000127425	0.000111285	9.6491e-05	8.46616e-05	7.52678e-05	6.86389e-05	6.40378e-05	6.09486e-05	5.91579e-05	5.84202e-05	5.83642e-05	5.89584e-05	6.02509e-05	6.17742e-05	6.34948e-05	6.54137e-05	6.74105e-05	6.93667e-05	6.6571e-05	4.57176e-05	1.31232e-05
204.55	0.00494238	8.76552	0.00833902	0.422028	0.0038636	1.16377e-06	0.00109026			1.67258e-06	2.3006e-06	3.14323e-06	4.26567e-06	5.75013e-06	7.69919e-06	1.02398e-05	1.35274e-05	1.77508e-05	2.31364e-05	2.9954e-05	3.85204e-05	4.92044e-05	6.24304e-05	7.86803e-05	9.8495e-05	0.000122473	0.000149038	0.000185578	0.000202024	0.000154238	0.000133799	0.000115234	0.000100429	8.86869e-05	8.03338e-05	7.44462e-05	7.03797e-05	6.78539e-05	6.65584e-05	6.60487e-05	6.62738e-05	6.72725e-05	6.85108e-05	6.99468e-05	7.15776e-05	7.32679e-05	7.48885e-05	7.13883e-05	4.86971e-05
205.7	0.00566303	8.9153	0.00946101	0.47881	0.00436254	1.69127e-06	0.00109695			1.67258e-06	2.3006e-06	3.14323e-06	4.26567e-06	5.75013e-06	7.69919e-06	1.02398e-05	1.35274e-05	1.77508e-05	2.31364e-05	2.9954e-05	3.85204e-05	4.92044e-05	6.24304e-05	7.86803e-05	9.8495e-05	0.000122473	0.000151267	0.000182844	0.000226144	0.000244535	0.000185442	0.000159789	0.000136695	0.000118334	0.000103798	9.33909e-05	8.59659e-05	8.07253e-05	7.73063e-05	7.53218e-05	7.42438e-05	7.39973e-05	7.46087e-05	7.54726e-05	7.65378e-05	7.7797e-05	7.91003e-05	8.03077e-05	7.60409e-05
206.85	0.00643535	9.07029	0.00979575	0.495751	0.00493682	2.24561e-06	0.00110399			1.67258e-06	2.3006e-06	3.14323e-06	4.26567e-06	5.75013e-06	7.69919e-06	1.02398e-05	1.35274e-05	1.77508e-05	2.31364e-05	2.9954e-05	3.85204e-05	4.92044e-05	6.24304e-05	7.86803e-05	9.8495e-05	0.000122473	0.000151267	0.000185578	0.000222813	0.000273731	0.000294007	0.000221463	0.000189548	0.000161066	0.000138496	0.000120668	0.000107842	9.86026e-05	9.19707e-05	8.74849e-05	8.46676e-05	8.28961e-05	8.20669e-05	8.21901e-05	8.25843e-05	8.31883e-05	8.39899e-05	8.48243e-05	8.55415e-05
208	0.00730263	9.23077	0.0106211	0.537518	0.00559706	2.90896e-06	0.00111475			1.67258e-06	2.3006e-06	3.14323e-06	4.26567e-06	5.75013e-06	7.69919e-06	1.02398e-05	1.35274e-05	1.77508e-05	2.31364e-05	2.9954e-05	3.85204e-05	4.92044e-05	6.24304e-05	7.86803e-05	9.8495e-05	0.000122473	0.000151267	0.000185578	0.000226144	0.000269698	0.000329109	0.000351117	0.000262708	0.000223342	0.000188508	0.000161006	0.000139341	0.000123695	0.000112338	0.00010408	9.83398e-05	9.45347e-05	9.19362e-05	9.04062e-05	8.99348e-05	8.97601e-05	8.98103e-05	9.00677e-05	9.03525e-05
209.15	0.00827185	9.39702	0.0114531	0.579626	0.0063508	3.69043e-06	0.00112739			1.67258e-06	2.3006e-06	3.14323e-06	4.26567e-06	5.75013e-06	7.69919e-06	1.02398e-05	1.35274e-05	1.77508e-05	2.31364e-05	2.9954e-05	3.85204e-05	4.92044e-05	6.24304e-05	7.86803e-05	9.8495e-05	0.000122473	0.000151267	0.000185578	0.000226144	0.000273731	0.00032426	0.000393037	0.000416508	0.000309545	0.000261395	0.000219148	0.00018592	0.000159823	0.000140926	0.00012713	0.000116994	0.0001098	0.000104844	0.000101278	9.8925e-05	9.77493e-05	9.69053e-05	9.63093e-05	9.59377e-05
210.3	0.00930805	9.56938	0.0118076	0.597569	0.0072095	4.40393e-06	0.00114526			1.67258e-06	2.3006e-06	3.14323e-06	4.26567e-06	5.75013e-06	7.69919e-06	1.02398e-05	1.35274e-05	1.77508e-05	2.31364e-05	2.9954e-05	3.85204e-05	4.92044e-05	6.24304e-05	7.86803e-05	9.8495e-05	0.000122473	0.000151267	0.000185578	0.000226144	0.000273731	0.000329109	0.000387247	0.000466236	0.000490765	0.000362286	0.000303881	0.000253058	0.00021325	0.000182087	0.000159481	0.000142903	0.000130628	0.000121774	0.000115498	0.000110822	0.000107521	0.00010553	0.000103918	0.000102586
211.45	0.0104875	9.74817	0.0129516	0.655464	0.00817145	5.36419e-06	0.00115212			1.67258e-06	2.3006e-06	3.14323e-06	4.26567e-06	5.75013e-06	7.69919e-06	1.02398e-05	1.35274e-05	1.77508e-05	2.31364e-05	2.9954e-05	3.85204e-05	4.92044e-05	6.24304e-05	7.86803e-05	9.8495e-05	0.000122473	0.000151267	0.000185578	0.000226144	0.000273731	0.000329109	0.000393037	0.000459367	0.000549358	0.000574383	0.00042117	0.000350903	0.000290257	0.000242957	0.000206062	0.000179269	0.000159557	0.000144874	0.000134148	0.000126381	0.000120451	0.00011608	0.000113167	0.00011069
212.6	0.0117704	9.93377	0.0135656	0.68654	0.00925747	6.31479e-06	0.00116503			1.67258e-06	2.3006e-06	3.14323e-06	4.26567e-06	5.75013e-06	7.69919e-06	1.02398e-05	1.35274e-05	1.77508e-05	2.31364e-05	2.9954e-05	3.85204e-05	4.92044e-05	6.24304e-05	7.86803e-05	9.8495e-05	0.000122473	0.000151267	0.000185578	0.000226144	0.000273731	0.000329109	0.000393037	0.000466236	0.000541265	0.000642959	0.00066774	0.000486342	0.000402485	0.000330691	0.000274946	0.000231629	0.000200161	0.000176957	0.000159595	0.000146789	0.000137362	0.000130039	0.00012448	0.000120542
213.75	0.0131923	10.1266	0.0144687	0.732242	0.0104627	7.45076e-06	0.00116387			1.67258e-06	2.3006e-06	3.14323e-06	4.26567e-06	5.75013e-06	7.69919e-06	1.02398e-05	1.35274e-05	1.77508e-05	2.31364e-05	2.9954e-05	3.85204e-05	4.92044e-05	6.24304e-05	7.86803e-05	9.8495e-05	0.000122473	0.000151267	0.000185578	0.000226144	0.000273731	0.000329109	0.000393037	0.000466236	0.000549358	0.000633487	0.000747463	0.000771065	0.000557833	0.000458553	0.000374232	0.00030906	0.000258623	0.000221989	0.000194939	0.000174634	0.000159544	0.000148297	0.000139449	0.000132592
214.9	0.0147008	10.327	0.0147595	0.746959	0.0118147	8.32953e-06	0.00117655			1.67258e-06	2.3006e-06	3.14323e-06	4.26567e-06	5.75013e-06	7.69919e-06	1.02398e-05	1.35274e-05	1.77508e-05	2.31364e-05	2.9954e-05	3.85204e-05	4.92044e-05	6.24304e-05	7.86803e-05	9.8495e-05	0.000122473	0.000151267	0.000185578	0.000226144	0.000273731	0.000329109	0.000393037	0.000466236	0.000549358	0.000642959	0.000736451	0.000863125	0.000884409	0.000635542	0.000518929	0.000420666	0.000345078	0.000286827	0.000244546	0.000213308	0.000189808	0.000172244	0.000159028	0.000148538
216.05	0.0163382	10.5356	0.0153932	0.77903	0.0133142	9.14429e-06	0.00119248			1.67258e-06	2.3006e-06	3.14323e-06	4.26567e-06	5.75013e-06	7.69919e-06	1.02398e-05	1.35274e-05	1.77508e-05	2.31364e-05	2.9954e-05	3.85204e-05	4.92044e-05	6.24304e-05	7.86803e-05	9.8495e-05	0.000122473	0.000151267	0.000185578	0.000226144	0.000273731	0.000329109	0.000393037	0.000466236	0.000549358	0.000642959	0.000747463	0.000850409	0.000990001	0.00100761	0.00071922	0.000583316	0.00046969	0.000382709	0.000315973	0.000267589	0.000231842	0.000204917	0.000184708	0.000169392
217.2	0.0181017	10.7527	0.0159159	0.805485	0.0149679	9.82077e-06	0.00121086			1.67258e-06	2.3006e-06	3.14323e-06	4.26567e-06	5.75013e-06	7.69919e-06	1.02398e-05	1.35274e-05	1.77508e-05	2.31364e-05	2.9954e-05	3.85204e-05	4.92044e-05	6.24304e-05	7.86803e-05	9.8495e-05	0.000122473	0.000151267	0.000185578	0.000226144	0.000273731	0.000329109	0.000393037	0.000466236	0.000549358	0.000642959	0.000747463	0.000863125	0.000975416	0.00112791	0.00114028	0.000808459	0.000651295	0.00052091	0.000421598	0.000345746	0.000290841	0.000250298	0.000219746	0.000196746
218.35	0.019961	10.979	0.0160953	0.814565	0.0167781	1.01306e-05	0.00122669			1.67258e-06	2.3006e-06	3.14323e-06	4.26567e-06	5.75013e-06	7.69919e-06	1.02398e-05	1.35274e-05	1.77508e-05	2.31364e-05	2.9954e-05	3.85204e-05	4.92044e-05	6.24304e-05	7.86803e-05	9.8495e-05	0.000122473	0.000151267	0.000185578	0.000226144	0.000273731	0.000329109	0.000393037	0.000466236	0.000549358	0.000642959	0.000747463	0.000863125	0.000990001	0.0011113	0.00127642	0.00128176	0.000902676	0.00072232	0.000573843	0.000461325	0.000375789	0.000313992	0.00026841	0.000234067
219.5	0.0219325	11.215	0.0163567	0.827792	0.0187461	1.01532e-05	0.00123515			1.67258e-06	2.3006e-06	3.14323e-06	4.26567e-06	5.75013e-06	7.69919e-06	1.02398e-05	1.35274e-05	1.77508e-05	2.31364e-05	2.9954e-05	3.85204e-05	4.92044e-05	6.24304e-05	7.86803e-05	9.8495e-05	0.000122473	0.000151267	0.000185578	0.000226144	0.000273731	0.000329109	0.000393037	0.000466236	0.000549358	0.000642959	0.000747463	0.000863125	0.000990001	0.00112791	0.00125762	0.00143479	0.00143114	0.00100112	0.000795719	0.000627916	0.00050141	0.000405703	0.000336714	0.000285903
220.65	0.0240306	11.4613	0.016666	0.843446	0.0208786	9.93475e-06	0.00124164			1.67258e-06	2.3006e-06	3.14323e-06	4.26567e-06	5.75013e-06	7.69919e-06	1.02398e-05	1.35274e-05	1.77508e-05	2.31364e-05	2.9954e-05	3.85204e-05	4.92044e-05	6.24304e-05	7.86803e-05	9.8495e-05	0.000122473	0.000151267	0.000185578	0.000226144	0.000273731	0.000329109	0.000393037	0.000466236	0.000549358	0.000642959	0.000747463	0.000863125	0.000990001	0.00112791	0.00127642	0.00141366	0.001602	0.00158721	0.00110284	0.000870699	0.000682476	0.000541324	0.000435061	0.000358659
221.8	0.026168	11.7187	0.0162411	0.821944	0.0231878	8.88169e-06	0.00126218			1.67258e-06	2.3006e-06	3.14323e-06	4.26567e-06	5.75013e-06	7.69919e-06	1.02398e-05	1.35274e-05	1.77508e-05	2.31364e-05	2.9954e-05	3.85204e-05	4.92044e-05	6.24304e-05	7.86803e-05	9.8495e-05	0.000122473	0.000151267	0.000185578	0.000226144	0.000273731	0.000329109	0.000393037	0.000466236	0.000549358	0.000642959	0.000747463	0.000863125	0.000990001	0.00112791	0.00127642	0.00143479	0.0015784	0.00177671	0.00174849	0.00120676	0.000946355	0.000736803	0.000580496	0.000463415
222.95	0.0284646	11.988	0.0166754	0.843924	0.0256615	7.85768e-06	0.00128036			1.67258e-06	2.3006e-06	3.14323e-06	4.26567e-06	5.75013e-06	7.69919e-06	1.02398e-05	1.35274e-05	1.77508e-05	2.31364e-05	2.9954e-05	3.85204e-05	4.92044e-05	6.24304e-05	7.86803e-05	9.8495e-05	0.000122473	0.000151267	0.000185578	0.000226144	0.000273731	0.000329109	0.000393037	0.000466236	0.000549358	0.000642959	0.000747463	0.000863125	0.000990001	0.00112791	0.00127642	0.00143479	0.001602	0.00175053	0.00195725	0.00191325	0.00131162	0.00102169	0.000790121	0.000618329
224.1	0.0308102	12.2699	0.0162571	0.822752	0.0282995	6.30353e-06	0.00130059			1.67258e-06	2.3006e-06	3.14323e-06	4.26567e-06	5.75013e-06	7.69919e-06	1.02398e-05	1.35274e-05	1.77508e-05	2.31364e-05	2.9954e-05	3.85204e-05	4.92044e-05	6.24304e-05	7.86803e-05	9.8495e-05	0.000122473	0.000151267	0.000185578	0.000226144	0.000273731	0.000329109	0.000393037	0.000466236	0.000549358	0.000642959	0.000747463	0.000863125	0.000990001	0.00112791	0.00127642	0.00143479	0.001602	0.00177671	0.00192841	0.00214168	0.00207949	0.00141603	0.00109562	0.000841615
225.25	0.0332151	12.5654	0.0158935	0.804353	0.031087	4.52878e-06	0.00130886			1.67258e-06	2.3006e-06	3.14323e-06	4.26567e-06	5.75013e-06	7.69919e-06	1.02398e-05	1.35274e-05	1.77508e-05	2.31364e-05	2.9954e-05	3.85204e-05	4.92044e-05	6.24304e-05	7.86803e-05	9.8495e-05	0.000122473	0.000151267	0.000185578	0.000226144	0.000273731	0.000329109	0.000393037	0.000466236	0.000549358	0.000642959	0.000747463	0.000863125	0.000990001	0.00112791	0.00127642	0.00143479	0.001602	0.00177671	0.00195725	0.00211012	0.00232777	0.00224503	0.0015185	0.00116703
226.4	0.0357497	12.8755	0.0159542	0.807421	0.0340298	2.95808e-06	0.00132486			1.67258e-06	2.3006e-06	3.14323e-06	4.26567e-06	5.75013e-06	7.69919e-06	1.02398e-05	1.35274e-05	1.77508e-05	2.31364e-05	2.9954e-05	3.85204e-05	4.92044e-05	6.24304e-05	7.86803e-05	9.8495e-05	0.000122473	0.000151267	0.000185578	0.000226144	0.000273731	0.000329109	0.000393037	0.000466236	0.000549358	0.000642959	0.000747463	0.000863125	0.000990001	0.00112791	0.00127642	0.00143479	0.001602	0.00177671	0.00195725	0.00214168	0.00229348	0.00251307	0.00240749	0.00161746
227.55	0.0383676	13.2013	0.0156746	0.79327	0.0371206	1.55494e-06	0.00135091			1.67258e-06	2.3006e-06	3.14323e-06	4.26567e-06	5.75013e-06	7.69919e-06	1.02398e-05	1.35274e-05	1.77508e-05	2.31364e-05	2.9954e-05	3.85204e-05	4.92044e-05	6.24304e-05	7.86803e-05	9.8495e-05	0.000122473	0.000151267	0.000185578	0.000226144	0.000273731	0.000329109	0.000393037	0.000466236	0.000549358	0.000642959	0.000747463	0.000863125	0.000990001	0.00112791	0.00127642	0.00143479	0.001602	0.00177671	0.00195725	0.00214168	0.00232777	0.00247604	0.00269492	0.00256439
228.7	0.0409971	13.544	0.0149574	0.756976	0.0403383	4.33952e-07	0.00136679			1.67258e-06	2.3006e-06	3.14323e-06	4.26567e-06	5.75013e-06	7.69919e-06	1.02398e-05	1.35274e-05	1.77508e-05	2.31364e-05	2.9954e-05	3.85204e-05	4.92044e-05	6.24304e-05	7.86803e-05	9.8495e-05	0.000122473	0.000151267	0.000185578	0.000226144	0.000273731	0.000329109	0.000393037	0.000466236	0.000549358	0.000642959	0.000747463	0.000863125	0.000990001	0.00112791	0.00127642	0.00143479	0.001602	0.00177671	0.00195725	0.00214168	0.00232777	0.00251307	0.00265522	0.00287056
229.85	0.0437454	13.905	0.0148324	0.75065	0.0437044	1.6808e-09	0.00139542			1.67258e-06	2.3006e-06	3.14323e-06	4.26567e-06	5.75013e-06	7.69919e-06	1.02398e-05	1.35274e-05	1.77508e-05	2.31364e-05	2.9954e-05	3.85204e-05	4.92044e-05	6.24304e-05	7.86803e-05	9.8495e-05	0.000122473	0.000151267	0.000185578	0.000226144	0.000273731	0.000329109	0.000393037	0.000466236	0.000549358	0.000642959	0.000747463	0.000863125	0.000990001	0.00112791	0.00127642	0.00143479	0.001602	0.00177671	0.00195725	0.00214168	0.00232777	0.00251307	0.00269492	0.00282827
231	0.0466302	14.2857	0.0147499	0.746473	0.0472318	3.61938e-07	0.0013924			1.67258e-06	2.3006e-06	3.14323e-06	4.26567e-06	5.75013e-06	7.69919e-06	1.02398e-05	1.35274e-05	1.77508e-05	2.31364e-05	2.9954e-05	3.85204e-05	4.92044e-05	6.24304e-05	7.86803e-05	9.8495e-05	0.000122473	0.000151267	0.000185578	0.000226144	0.000273731	0.000329109	0.000393037	0.000466236	0.000549358	0.000642959	0.000747463	0.000863125	0.000990001	0.00112791	0.00127642	0.00143479	0.001602	0.00177671	0.00195725	0.00214168	0.00232777	0.00251307	0.00269492	0.00287056
232.15	0.0496014	14.6879	0.0143718	0.727338	0.0510698	2.15604e-06	0.00143073			1.67258e-06	2.3006e-06	3.14323e-06	4.26567e-06	5.75013e-06	7.69919e-06	1.02398e-05	1.35274e-05	1.77508e-05	2.31364e-05	2.9954e-05	3.85204e-05	4.92044e-05	6.24304e-05	7.86803e-05	9.8495e-05	0.000122473	0.000151267	0.000185578	0.000226144	0.000273731	0.000329109	0.000393037	0.000466236	0.000549358	0.000642959	0.000747463	0.000863125	0.000990001	0.00112791	0.00127642	0.00143479	0.001602	0.00177671	0.00195725	0.00214168	0.00232777	0.00251307	0.00269492	0.00287056
233.3	0.0525451	15.1134	0.0134479	0.680582	0.055286	7.51238e-06	0.00144408			1.67258e-06	2.3006e-06	3.14323e-06	4.26567e-06	5.75013e-06	7.69919e-06	1.02398e-05	1.35274e-05	1.77508e-05	2.31364e-05	2.9954e-05	3.85204e-05	4.92044e-05	6.24304e-05	7.86803e-05	9.8495e-05	0.000122473	0.000151267	0.000185578	0.000226144	0.000273731	0.000329109	0.000393037	0.000466236	0.000549358	0.000642959	0.000747463	0.000863125	0.000990001	0.00112791	0.00127642	0.00143479	0.001602	0.00177671	0.00195725	0.00214168	0.00232777	0.00251307	0.00269492	0.00287056
234.45	0.0557978	15.5642	0.0140111	0.709086	0.0599004	1.6831e-05	0.00146576			1.67258e-06	2.3006e-06	3.14323e-06	4.26567e-06	5.75013e-06	7.69919e-06	1.02398e-05	1.35274e-05	1.77508e-05	2.31364e-05	2.9954e-05	3.85204e-05	4.92044e-05	6.24304e-05	7.86803e-05	9.8495e-05	0.000122473	0.000151267	0.000185578	0.000226144	0.000273731	0.000329109	0.000393037	0.000466236	0.000549358	0.000642959	0.000747463	0.000863125	0.000990001	0.00112791	0.00127642	0.00143479	0.001602	0.00177671	0.00195725	0.00214168	0.00232777	0.00251307	0.00269492	0.00287056
235.6	0.0591949	16.0428	0.0137732	0.697042	0.064696	3.02614e-05	0.00147927			1.67258e-06	2.3006e-06	3.14323e-06	4.26567e-06	5.75013e-06	7.69919e-06	1.02398e-05	1.35274e-05	1.77508e-05	2.31364e-05	2.9954e-05	3.85204e-05	4.92044e-05	6.24304e-05	7.86803e-05	9.8495e-05	0.000122473	0.000151267	0.000185578	0.000226144	0.000273731	0.000329109	0.000393037	0.000466236	0.000549358	0.000642959	0.000747463	0.000863125	0.000990001	0.00112791	0.00127642	0.00143479	0.001602	0.00177671	0.00195725	0.00214168	0.00232777	0.00251307	0.00269492	0.00287056
236.75	0.062736	16.5517	0.0134874	0.682581	0.0693853	4.42127e-05	0.0015017			1.67258e-06	2.3006e-06	3.14323e-06	4.26567e-06	5.75013e-06	7.69919e-06	1.02398e-05	1.35274e-05	1.77508e-05	2.31364e-05	2.9954e-05	3.85204e-05	4.92044e-05	6.24304e-05	7.86803e-05	9.8495e-05	0.000122473	0.000151267	0.000185578	0.000226144	0.000273731	0.000329109	0.000393037	0.000466236	0.000549358	0.000642959	0.000747463	0.000863125	0.000990001	0.00112791	0.00127642	0.00143479	0.001602	0.00177671	0.00195725	0.00214168	0.00232777	0.00251307	0.00269492	0.00287056
237.9	0.0664308	17.094	0.0131943	0.667746	0.0737845	5.40773e-05	0.0015271			1.67258e-06	2.3006e-06	3.14323e-06	4.26567e-06	5.75013e-06	7.69919e-06	1.02398e-05	1.35274e-05	1.77508e-05	2.31364e-05	2.9954e-05	3.85204e-05	4.92044e-05	6.24304e-05	7.86803e-05	9.8495e-05	0.000122473	0.000151267	0.000185578	0.000226144	0.000273731	0.000329109	0.000393037	0.000466236	0.000549358	0.000642959	0.000747463	0.000863125	0.000990001	0.00112791	0.00127642	0.00143479	0.001602	0.00177671	0.00195725	0.00214168	0.00232777	0.00251307	0.00269492	0.00287056
239.05	0.0703852	17.673	0.0132111	0.668599	0.0779087	5.66032e-05	0.00155524			1.67258e-06	2.3006e-06	3.14323e-06	4.26567e-06	5.75013e-06	7.69919e-06	1.02398e-05	1.35274e-05	1.77508e-05	2.31364e-05	2.9954e-05	3.85204e-05	4.92044e-05	6.24304e-05	7.86803e-05	9.8495e-05	0.000122473	0.000151267	0.000185578	0.000226144	0.000273731	0.000329109	0.000393037	0.000466236	0.000549358	0.000642959	0.000747463	0.000863125	0.000990001	0.00112791	0.00127642	0.00143479	0.001602	0.00177671	0.00195725	0.00214168	0.00232777	0.00251307	0.00269492	0.00287056
240.2	0.0746762	18.2927	0.013381	0.677198	0.0818588	5.15895e-05	0.00157012			1.67258e-06	2.3006e-06	3.14323e-06	4.26567e-06	5.75013e-06	7.69919e-06	1.02398e-05	1.35274e-05	1.77508e-05	2.31364e-05	2.9954e-05	3.85204e-05	4.92044e-05	6.24304e-05	7.86803e-05	9.8495e-05	0.000122473	0.000151267	0.000185578	0.000226144	0.000273731	0.000329109	0.000393037	0.000466236	0.000549358	0.000642959	0.000747463	0.000863125	0.000990001	0.00112791	0.00127642	0.00143479	0.001602	0.00177671	0.00195725	0.00214168	0.00232777	0.00251307	0.00269492	0.00287056
241.35	0.0792236	18.9573	0.0132036	0.668219	0.0857629	4.27625e-05	0.00161387			1.67258e-06	2.3006e-06	3.14323e-06	4.26567e-06	5.75013e-06	7.69919e-06	1.02398e-05	1.35274e-05	1.77508e-05	2.31364e-05	2.9954e-05	3.85204e-05	4.92044e-05	6.24304e-05	7.86803e-05	9.8495e-05	0.000122473	0.000151267	0.000185578	0.000226144	0.000273731	0.000329109	0.000393037	0.000466236	0.000549358	0.000642959	0.000747463	0.000863125	0.000990001	0.00112791	0.00127642	0.00143479	0.001602	0.00177671	0.00195725	0.00214168	0.00232777	0.00251307	0.00269492	0.00287056
242.5	0.0842896	19.6721	0.0136597	0.691303	0.0896416	2.86446e-05	0.0016285			1.67258e-06	2.3006e-06	3.14323e-06	4.26567e-06	5.75013e-06	7.69919e-06	1.02398e-05	1.35274e-05	1.77508e-05	2.31364e-05	2.9954e-05	3.85204e-05	4.92044e-05	6.24304e-05	7.86803e-05	9.8495e-05	0.000122473	0.000151267	0.000185578	0.000226144	0.000273731	0.000329109	0.000393037	0.000466236	0.000549358	0.000642959	0.000747463	0.000863125	0.000990001	0.00112791	0.00127642	0.00143479	0.001602	0.00177671	0.00195725	0.00214168	0.00232777	0.00251307	0.00269492	0.00287056
243.65	0.0898478	20.4429	0.0138781	0.702355	0.0935902	1.40055e-05	0.00168701			1.67258e-06	2.3006e-06	3.14323e-06	4.26567e-06	5.75013e-06	7.69919e-06	1.02398e-05	1.35274e-05	1.77508e-05	2.31364e-05	2.9954e-05	3.85204e-05	4.92044e-05	6.24304e-05	7.86803e-05	9.8495e-05	0.000122473	0.000151267	0.000185578	0.000226144	0.000273731	0.000329109	0.000393037	0.000466236	0.000549358	0.000642959	0.000747463	0.000863125	0.000990001	0.00112791	0.00127642	0.00143479	0.001602	0.00177671	0.00195725	0.00214168	0.00232777	0.00251307	0.00269492	0.00287056
244.8	0.0958634	21.2766	0.0138662	0.701751	0.0976195	3.08392e-06	0.00172115			1.67258e-06	2.3006e-06	3.14323e-06	4.26567e-06	5.75013e-06	7.69919e-06	1.02398e-05	1.35274e-05	1.77508e-05	2.31364e-05	2.9954e-05	3.85204e-05	4.92044e-05	6.24304e-05	7.86803e-05	9.8495e-05	0.000122473	0.000151267	0.000185578	0.000226144	0.000273731	0.000329109	0.000393037	0.000466236	0.000549358	0.000642959	0.000747463	0.000863125	0.000990001	0.00112791	0.00127642	0.00143479	0.001602	0.00177671	0.00195725	0.00214168	0.00232777	0.00251307	0.00269492	0.00287056
245.95	0.10281	22.1811	0.0147339	0.745663	0.10185	9.22789e-07	0.00177965			1.67258e-06	2.3006e-06	3.14323e-06	4.26567e-06	5.75013e-06	7.69919e-06	1.02398e-05	1.35274e-05	1.77508e-05	2.31364e-05	2.9954e-05	3.85204e-05	4.92044e-05	6.24304e-05	7.86803e-05	9.8495e-05	0.000122473	0.000151267	0.000185578	0.000226144	0.000273731	0.000329109	0.000393037	0.000466236	0.000549358	0.000642959	0.000747463	0.000863125	0.000990001	0.00112791	0.00127642	0.00143479	0.001602	0.00177671	0.00195725	0.00214168	0.00232777	0.00251307	0.00269492	0.00287056
247.1	0.110609	23.166	0.0151643	0.767445	0.106443	1.73632e-05	0.00190266			1.67258e-06	2.3006e-06	3.14323e-06	4.26567e-06	5.75013e-06	7.69919e-06	1.02398e-05	1.35274e-05	1.77508e-05	2.31364e-05	2.9954e-05	3.85204e-05	4.92044e-05	6.24304e-05	7.86803e-05	9.8495e-05	0.000122473	0.000151267	0.000185578	0.000226144	0.000273731	0.000329109	0.000393037	0.000466236	0.000549358	0.000642959	0.000747463	0.000863125	0.000990001	0.00112791	0.00127642	0.00143479	0.001602	0.00177671	0.00195725	0.00214168	0.00232777	0.00251307	0.00269492	0.00287056
248.25	0.119382	24.2424	0.015576	0.788282	0.11168	5.93253e-05	0.00219894			1.67258e-06	2.3006e-06	3.14323e-06	4.26567e-06	5.75013e-06	7.69919e-06	1.02398e-05	1.35274e-05	1.77508e-05	2.31364e-05	2.9954e-05	3.85204e-05	4.92044e-05	6.24304e-05	7.86803e-05	9.8495e-05	0.000122473	0.000151267	0.000185578	0.000226144	0.000273731	0.000329109	0.000393037	0.000466236	0.000549358	0.000642959	0.000747463	0.000863125	0.000990001	0.00112791	0.00127642	0.00143479	0.001602	0.00177671	0.00195725	0.00214168	0.00232777	0.00251307	0.00269492	0.00287056
249.4	0.129524	25.4237	0.0163738	0.82866	0.119181	0.000106989	0.00457164			1.67258e-06	2.3006e-06	3.14323e-06	4.26567e-06	5.75013e-06	7.69919e-06	1.02398e-05	1.35274e-05	1.77508e-05	2.31364e-05	2.9954e-05	3.85204e-05	4.92044e-05	6.24304e-05	7.86803e-05	9.8495e-05	0.000122473	0.000151267	0.000185578	0.000226144	0.000273731	0.000329109	0.000393037	0.000466236	0.000549358	0.000642959	0.000747463	0.000863125	0.000990001	0.00112791	0.00127642	0.00143479	0.001602	0.00177671	0.00195725	0.00214168	0.00232777	0.00251307	0.00269492	0.00287056
250.55	0.141923	26.7261	0.0181128	0.916669	0.134854	4.99668e-05	0.0169643			1.67258e-06	2.3006e-06	3.14323e-06	4.26567e-06	5.75013e-06	7.69919e-06	1.02398e-05	1.35274e-05	1.77508e-05	2.31364e-05	2.9954e-05	3.85204e-05	4.92044e-05	6.24304e-05	7.86803e-05	9.8495e-05	0.000122473	0.000151267	0.000185578	0.000226144	0.000273731	0.000329109	0.000393037	0.000466236	0.000549358	0.000642959	0.000747463	0.000863125	0.000990001	0.00112791	0.00127642	0.00143479	0.001602	0.00177671	0.00195725	0.00214168	0.00232777	0.00251307	0.00269492	0.00287056
251.7	0.155512	28.169	0.0178704	0.904398	0.150638	2.37552e-05	0.0264899			1.67258e-06	2.3006e-06	3.14323e-06	4.26567e-06	5.75013e-06	7.69919e-06	1.02398e-05	1.35274e-05	1.77508e-05	2.31364e-05	2.9954e-05	3.85204e-05	4.92044e-05	6.24304e-05	7.86803e-05	9.8495e-05	0.000122473	0.000151267	0.000185578	0.000226144	0.000273731	0.000329109	0.000393037	0.000466236	0.000549358	0.000642959	0.000747463	0.000863125	0.000990001	0.00112791	0.00127642	0.00143479	0.001602	0.00177671	0.00195725	0.00214168	0.00232777	0.00251307	0.00269492	0.00287056
252.85	0.170862	29.7767	0.018065	0.914247	0.165315	3.07727e-05	0.0297996			1.67258e-06	2.3006e-06	3.14323e-06	4.26567e-06	5.75013e-06	7.69919e-06	1.02398e-05	1.35274e-05	1.77508e-05	2.31364e-05	2.9954e-05	3.85204e-05	4.92044e-05	6.24304e-05	7.86803e-05	9.8495e-05	0.000122473	0.000151267	0.000185578	0.000226144	0.000273731	0.000329109	0.000393037	0.000466236	0.000549358	0.000642959	0.000747463	0.000863125	0.000990001	0.00112791	0.00127642	0.00143479	0.001602	0.00177671	0.00195725	0.00214168	0.00232777	0.00251307	0.00269492	0.00287056
254	0.188999	31.5789	0.0189777	0.960439	0.183451	3.07784e-05	0.0314756			1.67258e-06	2.3006e-06	3.14323e-06	4.26567e-06	5.75013e-06	7.69919e-06	1.02398e-05	1.35274e-05	1.77508e-05	2.31364e-05	2.9954e-05	3.85204e-05	4.92044e-05	6.24304e-05	7.86803e-05	9.8495e-05	0.000122473	0.000151267	0.000185578	0.000226144	0.000273731	0.000329109	0.000393037	0.000466236	0.000549358	0.000642959	0.000747463	0.000863125	0.000990001	0.00112791	0.00127642	0.00143479	0.001602	0.00177671	0.00195725	0.00214168	0.00232777	0.00251307	0.00269492	0.00287056
255.15	0.210079	33.6134	0.0194681	0.985256	0.207761	5.37116e-06	0.0334213			1.67258e-06	2.3006e-06	3.14323e-06	4.26567e-06	5.75013e-06	7.69919e-06	1.02398e-05	1.35274e-05	1.77508e-05	2.31364e-05	2.9954e-05	3.85204e-05	4.92044e-05	6.24304e-05	7.86803e-05	9.8495e-05	0.000122473	0.000151267	0.000185578	0.000226144	0.000273731	0.000329109	0.000393037	0.000466236	0.000549358	0.000642959	0.000747463	0.000863125	0.000990001	0.00112791	0.00127642	0.00143479	0.001602	0.00177671	0.00195725	0.00214168	0.00232777	0.00251307	0.00269492	0.00287056
256.3	0.23414	35.9281	0.0194506	0.98437	0.238244	1.68465e-05	0.0357373			1.67258e-06	2.3006e-06	3.14323e-06	4.26567e-06	5.75013e-06	7.69919e-06	1.02398e-05	1.35274e-05	1.77508e-05	2.31364e-05	2.9954e-05	3.85204e-05	4.92044e-05	6.24304e-05	7.86803e-05	9.8495e-05	0.000122473	0.000151267	0.000185578	0.000226144	0.000273731	0.000329109	0.000393037	0.000466236	0.000549358	0.000642959	0.000747463	0.000863125	0.000990001	0.00112791	0.00127642	0.00143479	0.001602	0.00177671	0.00195725	0.00214168	0.00232777	0.00251307	0.00269492	0.00287056
257.45	0.262332	38.5852	0.0197594	1	0.271564	8.52316e-05	0.0385606			1.67258e-06	2.3006e-06	3.14323e-06	4.26567e-06	5.75013e-06	7.69919e-06	1.02398e-05	1.35274e-05	1.77508e-05	2.31364e-05	2.9954e-05	3.85204e-05	4.92044e-05	6.24304e-05	7.86803e-05	9.8495e-05	0.000122473	0.000151267	0.000185578	0.000226144	0.000273731	0.000329109	0.000393037	0.000466236	0.000549358	0.000642959	0.000747463	0.000863125	0.000990001	0.00112791	0.00127642	0.00143479	0.001602	0.00177671	0.00195725	0.00214168	0.00232777	0.00251307	0.00269492	0.00287056
258.6	0.293592	41.6667	0.0187886	0.950867	0.301588	6.39242e-05	0.0419927			1.67258e-06	2.3006e-06	3.14323e-06	4.26567e-06	5.75013e-06	7.69919e-06	1.02398e-05	1.35274e-05	1.77508e-05	2.31364e-05	2.9954e-05	3.85204e-05	4.92044e-05	6.24304e-05	7.86803e-05	9.8495e-05	0.000122473	0.000151267	0.000185578	0.000226144	0.000273731	0.000329109	0.000393037	0.000466236	0.000549358	0.000642959	0.000747463	0.000863125	0.000990001	0.00112791	0.00127642	0.00143479	0.001602	0.00177671	0.00195725	0.00214168	0.00232777	0.00251307	0.00269492	0.00287056
259.75	0.326291	45.283	0.0166395	0.842106	0.323556	7.47838e-06	0.0461904			1.67258e-06	2.3006e-06	3.14323e-06	4.26567e-06	5.75013e-06	7.69919e-06	1.02398e-05	1.35274e-05	1.77508e-05	2.31364e-05	2.9954e-05	3.85204e-05	4.92044e-05	6.24304e-05	7.86803e-05	9.8495e-05	0.000122473	0.000151267	0.000185578	0.000226144	0.000273731	0.000329109	0.000393037	0.000466236	0.000549358	0.000642959	0.000747463	0.000863125	0.000990001	0.00112791	0.00127642	0.00143479	0.001602	0.00177671	0.00195725	0.00214168	0.00232777	0.00251307	0.00269492	0.00287056
260.9	0.355382	49.5868	0.0123455	0.624792	0.337624	0.000315339	0.0517453			1.67258e-06	2.3006e-06	3.14323e-06	4.26567e-06	5.75013e-06	7.69919e-06	1.02398e-05	1.35274e-05	1.77508e-05	2.31364e-05	2.9954e-05	3.85204e-05	4.92044e-05	6.24304e-05	7.86803e-05	9.8495e-05	0.000122473	0.000151267	0.000185578	0.000226144	0.000273731	0.000329109	0.000393037	0.000466236	0.000549358	0.000642959	0.000747463	0.000863125	0.000990001	0.00112791	0.00127642	0.00143479	0.001602	0.00177671	0.00195725	0.00214168	0.00232777	0.00251307	0.00269492	0.00287056
262.05	0.376979	54.7945	0.00750597	0.379868	0.347091	0.000893269	0.0590102			1.67258e-06	2.3006e-06	3.14323e-06	4.26567e-06	5.75013e-06	7.69919e-06	1.02398e-05	1.35274e-05	1.77508e-05	2.31364e-05	2.9954e-05	3.85204e-05	4.92044e-05	6.24304e-05	7.86803e-05	9.8495e-05	0.000122473	0.000151267	0.000185578	0.000226144	0.000273731	0.000329109	0.000393037	0.000466236	0.000549358	0.000642959	0.000747463	0.000863125	0.000990001	0.00112791	0.00127642	0.00143479	0.001602	0.00177671	0.00195725	0.00214168	0.00232777	0.00251307	0.00269492	0.00287056
263.2	0.388018	61.2245	0.00307309	0.155525	0.355429	0.00106206	0.0685393			1.67258e-06	2.3006e-06	3.14323e-06	4.26567e-06	5.75013e-06	7.69919e-06	1.02398e-05	1.35274e-05	1.77508e-05	2.31364e-05	2.9954e-05	3.85204e-05	4.92044e-05	6.24304e-05	7.86803e-05	9.8495e-05	0.000122473	0.000151267	0.000185578	0.000226144	0.000273731	0.000329109	0.000393037	0.000466236	0.000549358	0.000642959	0.000747463	0.000863125	0.000990001	0.00112791	0.00127642	0.00143479	0.001602	0.00177671	0.00195725	0.00214168	0.00232777	0.00251307	0.00269492	0.00287056
264.35	0.393076	69.3642	0.00109697	0.0555165	0.365146	0.000780078	0.0815406			1.67258e-06	2.3006e-06	3.14323e-06	4.26567e-06	5.75013e-06	7.69919e-06	1.02398e-05	1.35274e-05	1.77508e-05	2.31364e-05	2.9954e-05	3.85204e-05	4.92044e-05	6.24304e-05	7.86803e-05	9.8495e-05	0.000122473	0.000151267	0.000185578	0.000226144	0.000273731	0.000329109	0.000393037	0.000466236	0.000549358	0.000642959	0.000747463	0.000863125	0.000990001	0.00112791	0.00127642	0.00143479	0.001602	0.00177671	0.00195725	0.00214168	0.00232777	0.00251307	0.00269492	0.00287056
265.5	0.396725	80	0.000594868	0.0301055	0.377968	0.000351824	0.0995985			1.67258e-06	2.3006e-06	3.14323e-06	4.26567e-06	5.75013e-06	7.69919e-06	1.02398e-05	1.35274e-05	1.77508e-05	2.31364e-05	2.9954e-05	3.85204e-05	4.92044e-05	6.24304e-05	7.86803e-05	9.8495e-05	0.000122473	0.000151267	0.000185578	0.000226144	0.000273731	0.000329109	0.000393037	0.000466236	0.000549358	0.000642959	0.000747463	0.000863125	0.000990001	0.00112791	0.00127642	0.00143479	0.001602	0.00177671	0.00195725	0.00214168	0.00232777	0.00251307	0.00269492	0.00287056
266.65	0.399659	94.4882	0.000342889	0.0173532	0.395623	1.62874e-05	0.124944			1.67258e-06	2.3006e-06	3.14323e-06	4.26567e-06	5.75013e-06	7.69919e-06	1.02398e-05	1.35274e-05	1.77508e-05	2.31364e-05	2.9954e-05	3.85204e-05	4.92044e-05	6.24304e-05	7.86803e-05	9.8495e-05	0.000122473	0.000151267	0.000185578	0.000226144	0.000273731	0.000329109	0.000393037	0.000466236	0.000549358	0.000642959	0.000747463	0.000863125	0.000990001	0.00112791	0.00127642	0.00143479	0.001602	0.00177671	0.00195725	0.00214168	0.00232777	0.00251307	0.00269492	0.00287056
267.8	0.404527	115.385	0.000381602	0.0193124	0.420809	0.000265104	0.161437			1.67258e-06	2.3006e-06	3.14323e-06	4.26567e-06	5.75013e-06	7.69919e-06	1.02398e-05	1.35274e-05	1.77508e-05	2.31364e-05	2.9954e-05	3.85204e-05	4.92044e-05	6.24304e-05	7.86803e-05	9.8495e-05	0.000122473	0.000151267	0.000185578	0.000226144	0.000273731	0.000329109	0.000393037	0.000466236	0.000549358	0.000642959	0.000747463	0.000863125	0.000990001	0.00112791	0.00127642	0.00143479	0.001602	0.00177671	0.00195725	0.00214168	0.00232777	0.00251307	0.00269492	0.00287056
268.95	0.415542	148.148	0.000523677	0.0265027	0.457863	0.00179106	0.215404			1.67258e-06	2.3006e-06	3.14323e-06	4.26567e-06	5.75013e-06	7.69919e-06	1.02398e-05	1.35274e-05	1.77508e-05	2.31364e-05	2.9954e-05	3.85204e-05	4.92044e-05	6.24304e-05	7.86803e-05	9.8495e-05	0.000122473	0.000151267	0.000185578	0.000226144	0.000273731	0.000329109	0.000393037	0.000466236	0.000549358	0.000642959	0.000747463	0.000863125	0.000990001	0.00112791	0.00127642	0.00143479	0.001602	0.00177671	0.00195725	0.00214168	0.00232777	0.00251307	0.00269492	0.00287056
270.1	0.444391	206.897	0.000703235	0.0355899	0.511121	0.00445296	0.293189			1.67258e-06	2.3006e-06	3.14323e-06	4.26567e-06	5.75013e-06	7.69919e-06	1.02398e-05	1.35274e-05	1.77508e-05	2.31364e-05	2.9954e-05	3.85204e-05	4.92044e-05	6.24304e-05	7.86803e-05	9.8495e-05	0.000122473	0.000151267	0.000185578	0.000226144	0.000273731	0.000329109	0.000393037	0.000466236	0.000549358	0.000642959	0.000747463	0.000863125	0.000990001	0.00112791	0.00127642	0.00143479	0.001602	0.00177671	0.00195725	0.00214168	0.00232777	0.00251307	0.00269492	0.00287056
271.25	0.539677	342.857	0.000845836	0.0428067	0.58861	0.00239448	0.40655			1.67258e-06	2.3006e-06	3.14323e-06	4.26567e-06	5.75013e-06	7.69919e-06	1.02398e-05	1.35274e-05	1.77508e-05	2.31364e-05	2.9954e-05	3.85204e-05	4.92044e-05	6.24304e-05	7.86803e-05	9.8495e-05	0.000122473	0.000151267	0.000185578	0.000226144	0.000273731	0.000329109	0.000393037	0.000466236	0.000549358	0.000642959	0.000747463	0.000863125	0.000990001	0.00112791	0.00127642	0.00143479	0.001602	0.00177671	0.00195725	0.00214168	0.00232777	0.00251307	0.00269492	0.00287056
272.4	0.713815	1000	0.00018171	0.00919612	0.695781	0.000325245	0.563467			1.67258e-06	2.3006e-06	3.14323e-06	4.26567e-06	5.75013e-06	7.69919e-06	1.02398e-05	1.35274e-05	1.77508e-05	2.31364e-05	2.9954e-05	3.85204e-05	4.92044e-05	6.24304e-05	7.86803e-05	9.8495e-05	0.000122473	0.000151267	0.000185578	0.000226144	0.000273731	0.000329109	0.000393037	0.000466236	0.000549358	0.000642959	0.000747463	0.000863125	0.000990001	0.00112791	0.00127642	0.00143479	0.001602	0.00177671	0.00195725	0.00214168	0.00232777	0.00251307	0.00269492	0.00287056
273.55	0.943907	-1090.91	0.000201747	0.0102102	0.920904	0.000529122	0.893342			1.67258e-06	2.3006e-06	3.14323e-06	4.26567e-06	5.75013e-06	7.69919e-06	1.02398e-05	1.35274e-05	1.77508e-05	2.31364e-05	2.9954e-05	3.85204e-05	4.92044e-05	6.24304e-05	7.86803e-05	9.8495e-05	0.000122473	0.000151267	0.000185578	0.000226144	0.000273731	0.000329109	0.000393037	0.000466236	0.000549358	0.000642959	0.000747463	0.000863125	0.000990001	0.00112791	0.00127642	0.00143479	0.001602	0.00177671	0.00195725	0.00214168	0.00232777	0.00251307	0.00269492	0.00287056
274.7	0.995897	-352.941	0.000435517	0.022041	0.993685	4.89334e-06	1			1.67258e-06	2.3006e-06	3.14323e-06	4.26567e-06	5.75013e-06	7.69919e-06	1.02398e-05	1.35274e-05	1.77508e-05	2.31364e-05	2.9954e-05	3.85204e-05	4.92044e-05	6.24304e-05	7.86803e-05	9.8495e-05	0.000122473	0.000151267	0.000185578	0.000226144	0.000273731	0.000329109	0.000393037	0.000466236	0.000549358	0.000642959	0.000747463	0.000863125	0.000990001	0.00112791	0.00127642	0.00143479	0.001602	0.00177671	0.00195725	0.00214168	0.00232777	0.00251307	0.00269492	0.00287056
275.85	0.993505	-210.526	-5.63206e-05	-0.00285031	0.983635	9.74168e-05	0.985267			1.67258e-06	2.3006e-06	3.14323e-06	4.26567e-06	5.75013e-06	7.69919e-06	1.02398e-05	1.35274e-05	1.77508e-05	2.31364e-05	2.9954e-05	3.85204e-05	4.92044e-05	6.24304e-05	7.86803e-05	9.8495e-05	0.000122473	0.000151267	0.000185578	0.000226144	0.000273731	0.000329109	0.000393037	0.000466236	0.000549358	0.000642959	0.000747463	0.000863125	0.000990001	0.00112791	0.00127642	0.00143479	0.001602	0.00177671	0.00195725	0.00214168	0.00232777	0.00251307	0.00269492	0.00287056
[truncated: 40 more columns]
