# Supplementary material for: Melting of aqueous NaCl solutions in porous materials: shifted phase transition distribution (SIDI) approach for determining NMR cryoporometry pore size distributions
Source: Royal Society of Chemistry journal article supplement (doi:10.1039/d3cp04029a), 2023-12-27
Supplement: d3cp04029a5.xlsx [file d3cp04029a5.xlsx]

## Sheet: Sheet1
Add measurement temperatures both to column A and row 19; measured signal intensities to column B; and saline intensities to column E
Use solver to minimize Diffsqusum (orange box), by letting parameters in yellow box to vary
										Melting point distribution is assumed to be a sum of three Gaussian distrubutions
						Diffsqusum				A1	A2	A3	Amplitude
						0.0108317				0.706987	0.234623	0.0977018
										Tmp 1	Tmp 2	Tmp 3	Mean melting temperature
						k (KÅ)				275.536	262.722	242.243
						300				Sigma 1	Sigma 2	Sigma 3	Width of distribution
						T0 (K)				0.283879	1.44397	15.6551
						273
							Mean pore diameter		Dm (Å)	23.039
									D*PSDN	0.0231064	0.0297508	0.038093	0.0485032	0.0614147	0.0773299	0.0968265	0.120562	0.149277	0.183798	0.225034	0.273977	0.331692	0.399309	0.478004	0.568983	0.673456	0.792605	0.927552	1.07932	1.24878	1.43662	1.64329	1.86895	2.11342	2.37614	2.65615	2.95201	3.26185	3.58328	3.91347	4.24912	4.58652	4.92158	5.24993	5.56696	5.86797	6.14821	6.40308	6.62814
							Pore diameter		D (Å)	6.81818	6.90846	7.00117	7.09639	7.19424	7.29483	7.39827	7.50469	7.61421	7.72698	7.84314	7.96284	8.08625	8.21355	8.34492	8.48057	8.62069	8.76552	8.9153	9.07029	9.23077	9.39702	9.56938	9.74817	9.93377	10.1266	10.327	10.5356	10.7527	10.979	11.215	11.4613	11.7188	11.988	12.2699	12.5654	12.8755	13.2013	13.544	13.905
					Max	0.0272518	Pore size distribution		PSD	9.23547e-05	0.000117358	0.000148276	0.000186264	0.000232639	0.000288887	0.000356664	0.000437797	0.000534273	0.000648224	0.000781904	0.000937651	0.00111785	0.00132487	0.00156101	0.0018284	0.00212894	0.00246419	0.00283529	0.00324283	0.00368675	0.00416627	0.0046798	0.00522481	0.00579785	0.00639448	0.00700927	0.00763583	0.00826689	0.00889437	0.00950956	0.0101032	0.0106659	0.011188	0.0116602	0.0120736	0.0124199	0.0126919	0.0128836	0.0129902
					Sum	17.2956	Normalized PSD		PSDN	0.00338894	0.00430643	0.00544096	0.00683492	0.00853664	0.0106006	0.0130877	0.0160649	0.0196051	0.0237865	0.0286918	0.0344069	0.0410193	0.0486159	0.0572808	0.0670926	0.0781209	0.090423	0.10404	0.118995	0.135284	0.152881	0.171724	0.191723	0.212751	0.234644	0.257204	0.280195	0.303352	0.326377	0.348951	0.370736	0.391383	0.410542	0.427869	0.443037	0.455745	0.465727	0.47276	0.476674
							Sum D1	0.63571	MP D1	0	0	0	0	0	0	0	0	0	0	0	0	0	0	0	0	0	0	0	0	0	0	0	0	0	0	0	0	0	0	0	0	0	0	0	0	0	0	0	0
Tstep			Max				Sum D2	0.234623	MP D2	0	0	0	0	0	0	0	0	0	0	0	0	0	0	0	0	0	0	0	0	0	9.57656e-301	4.74007e-288	1.24421e-275	1.73197e-263	1.27855e-251	5.00535e-240	1.03916e-228	1.14411e-217	6.6802e-207	2.06845e-196	3.39653e-186	2.95774e-176	1.36591e-166	3.34515e-157	4.34457e-148	2.99235e-139	1.09298e-130	2.11713e-122	2.17479e-114
1.15			0.0183071				Sum D3	0.096276	MP D3	3.57779e-06	4.66761e-06	6.05662e-06	7.81669e-06	1.00339e-05	1.28108e-05	1.62682e-05	2.05474e-05	2.58126e-05	3.22525e-05	4.00822e-05	4.95446e-05	6.09112e-05	7.44825e-05	9.05875e-05	0.000109582	0.000131846	0.000157779	0.000187797	0.000222323	0.000261781	0.000306582	0.000357119	0.000413748	0.000476776	0.000546449	0.000622933	0.000706301	0.000796516	0.000893421	0.000996722	0.00110598	0.00122062	0.00133988	0.00146289	0.00158859	0.0017158	0.00184323	0.00196947	0.00209304
			Conventional						MP Dtot	3.57779e-06	4.66761e-06	6.05662e-06	7.81669e-06	1.00339e-05	1.28108e-05	1.62682e-05	2.05474e-05	2.58126e-05	3.22525e-05	4.00822e-05	4.95446e-05	6.09112e-05	7.44825e-05	9.05875e-05	0.000109582	0.000131846	0.000157779	0.000187797	0.000222323	0.000261781	0.000306582	0.000357119	0.000413748	0.000476776	0.000546449	0.000622933	0.000706301	0.000796516	0.000893421	0.000996722	0.00110598	0.00122062	0.00133988	0.00146289	0.00158859	0.0017158	0.00184323	0.00196947	0.00209304
T (K)	Meas	D (Å)	PSD	PSDN	Fit	Diffsqu	Saline		T (K)	185	186.15	187.3	188.45	189.6	190.75	191.9	193.05	194.2	195.35	196.5	197.65	198.8	199.95	201.1	202.25	203.4	204.55	205.7	206.85	208	209.15	210.3	211.45	212.6	213.75	214.9	216.05	217.2	218.35	219.5	220.65	221.8	222.95	224.1	225.25	226.4	227.55	228.7	229.85
185	0.0012399	6.81818			0.00105267	3.50545e-08	0.000916993			3.52508e-06	4.66761e-06	5.41063e-06	4.40444e-06	4.0793e-06	3.75599e-06	3.50423e-06	3.31712e-06	3.22513e-06	3.2123e-06	3.26833e-06	3.39575e-06	3.59438e-06	3.85412e-06	4.18428e-06	4.60164e-06	5.08404e-06	5.6386e-06	6.27642e-06	6.99776e-06	7.80097e-06	8.12135e-06	6.05829e-06	1.89151e-06	1.0484e-06	1.03971e-06	1.1086e-06	1.21565e-06	1.34373e-06	1.45493e-06	1.60858e-06	1.73652e-06	1.89834e-06	2.04613e-06	2.19682e-06	2.34995e-06	2.51496e-06	2.66177e-06	2.81779e-06	2.91435e-06
186.15	0.00126552	6.90846	0.000560031	0.030591	0.00109007	3.07799e-08	0.000927856			3.57779e-06	4.59884e-06	6.05662e-06	6.98297e-06	5.6538e-06	5.20824e-06	4.76965e-06	4.42599e-06	4.16712e-06	4.02976e-06	3.99213e-06	4.03989e-06	4.17481e-06	4.39523e-06	4.68747e-06	5.06163e-06	5.53655e-06	6.08404e-06	6.71137e-06	7.43033e-06	8.23971e-06	9.13604e-06	9.46007e-06	7.01896e-06	2.17965e-06	1.20161e-06	1.18523e-06	1.25697e-06	1.37093e-06	1.50721e-06	1.62316e-06	1.78491e-06	1.91651e-06	2.08383e-06	2.23397e-06	2.38558e-06	2.53814e-06	2.70174e-06	2.84407e-06	2.99457e-06
187.3	0.00128776	7.00117	0.000473584	0.0258689	0.00113659	2.28522e-08	0.000944597			3.57779e-06	4.66761e-06	5.96739e-06	7.81669e-06	8.96374e-06	7.21848e-06	6.61383e-06	6.02428e-06	5.56014e-06	5.20676e-06	5.00803e-06	4.93456e-06	4.96673e-06	5.10498e-06	5.34559e-06	5.67034e-06	6.09001e-06	6.62556e-06	7.24156e-06	7.94524e-06	8.74905e-06	9.64987e-06	1.0642e-05	1.09602e-05	8.08819e-06	2.49817e-06	1.36979e-06	1.34385e-06	1.41752e-06	1.53772e-06	1.68148e-06	1.80109e-06	1.96992e-06	2.10377e-06	2.27513e-06	2.42592e-06	2.57662e-06	2.72665e-06	2.88678e-06	3.0225e-06
188.45	0.00132324	7.09639	0.000735083	0.040153	0.00118361	1.9497e-08	0.000951005			3.57779e-06	4.66761e-06	6.05662e-06	7.70153e-06	1.00339e-05	1.14444e-05	9.16658e-06	8.35356e-06	7.56798e-06	6.94731e-06	6.47076e-06	6.19029e-06	6.06666e-06	6.07335e-06	6.2088e-06	6.46645e-06	6.82238e-06	7.28788e-06	7.8861e-06	8.57292e-06	9.35535e-06	1.02464e-05	1.12405e-05	1.23295e-05	1.26298e-05	9.27015e-06	2.84783e-06	1.55311e-06	1.5155e-06	1.58998e-06	1.71551e-06	1.8658e-06	1.98777e-06	2.16239e-06	2.2969e-06	2.47062e-06	2.6202e-06	2.76799e-06	2.91339e-06	3.06789e-06
189.6	0.00135643	7.19424	0.000669282	0.0365587	0.00123904	1.37825e-08	0.000957435			3.57779e-06	4.66761e-06	6.05662e-06	7.81669e-06	9.88612e-06	1.28108e-05	1.4533e-05	1.15778e-05	1.04941e-05	9.45608e-06	8.63386e-06	7.99834e-06	7.61048e-06	7.41835e-06	7.38656e-06	7.51066e-06	7.78024e-06	8.16431e-06	8.67443e-06	9.33596e-06	1.00944e-05	1.09564e-05	1.19354e-05	1.3023e-05	1.42077e-05	1.44754e-05	1.05677e-05	3.22896e-06	1.75149e-06	1.69988e-06	1.77382e-06	1.90357e-06	2.05919e-06	2.18199e-06	2.36091e-06	2.49426e-06	2.66848e-06	2.8148e-06	2.95756e-06	3.09617e-06
190.75	0.00140433	7.29483	0.00093912	0.0512983	0.00130882	9.12093e-09	0.000971953			3.57779e-06	4.66761e-06	6.05662e-06	7.81669e-06	1.00339e-05	1.26221e-05	1.62682e-05	1.83559e-05	1.45446e-05	1.31123e-05	1.17517e-05	1.06721e-05	9.83334e-06	9.30613e-06	9.02238e-06	8.93537e-06	9.0366e-06	9.31057e-06	9.71761e-06	1.02692e-05	1.09929e-05	1.1822e-05	1.27625e-05	1.3828e-05	1.50068e-05	1.6284e-05	1.65015e-05	1.19819e-05	3.64139e-06	1.96458e-06	1.89642e-06	1.96826e-06	2.10087e-06	2.26039e-06	2.3823e-06	2.56377e-06	2.69401e-06	2.86666e-06	3.00758e-06	3.14312e-06
191.9	0.00145553	7.39827	0.000976114	0.053319	0.00138246	5.33873e-09	0.000975278			3.57779e-06	4.66761e-06	6.05662e-06	7.81669e-06	1.00339e-05	1.28108e-05	1.60285e-05	2.05474e-05	2.30595e-05	1.81732e-05	1.62954e-05	1.45259e-05	1.31205e-05	1.20243e-05	1.13184e-05	1.09142e-05	1.07508e-05	1.08141e-05	1.10819e-05	1.15042e-05	1.20918e-05	1.28742e-05	1.37707e-05	1.47862e-05	1.59345e-05	1.71998e-05	1.85632e-05	1.87099e-05	1.35124e-05	4.0844e-06	2.19173e-06	2.10431e-06	2.17227e-06	2.30614e-06	2.4679e-06	2.58701e-06	2.76908e-06	2.89409e-06	3.063e-06	3.19627e-06
193.05	0.00151429	7.50469	0.00108872	0.0594701	0.00147499	1.54465e-09	0.000989139			3.57779e-06	4.66761e-06	6.05662e-06	7.81669e-06	1.00339e-05	1.28108e-05	1.62682e-05	2.02447e-05	2.58126e-05	2.88125e-05	2.2585e-05	2.01423e-05	1.78585e-05	1.60438e-05	1.46242e-05	1.36916e-05	1.31316e-05	1.28654e-05	1.28715e-05	1.31194e-05	1.35459e-05	1.41612e-05	1.49964e-05	1.59543e-05	1.70387e-05	1.8263e-05	1.96072e-05	2.10475e-05	2.10997e-05	1.51563e-05	4.55665e-06	2.43198e-06	2.32242e-06	2.38452e-06	2.51785e-06	2.67996e-06	2.79418e-06	2.97474e-06	3.0923e-06	3.25516e-06
194.2	0.00159138	7.61421	0.00138752	0.0757917	0.00157915	1.49647e-10	0.000997818			3.57779e-06	4.66761e-06	6.05662e-06	7.81669e-06	1.00339e-05	1.28108e-05	1.62682e-05	2.05474e-05	2.54323e-05	3.22525e-05	3.58071e-05	2.79167e-05	2.47634e-05	2.18374e-05	1.95129e-05	1.76906e-05	1.64733e-05	1.57145e-05	1.53131e-05	1.52379e-05	1.54478e-05	1.58642e-05	1.64955e-05	1.73744e-05	1.83848e-05	1.95286e-05	2.08192e-05	2.22313e-05	2.37359e-05	2.36667e-05	1.69087e-05	5.05615e-06	2.68406e-06	2.54934e-06	2.60343e-06	2.7342e-06	2.89457e-06	3.0017e-06	3.17848e-06	3.28631e-06
195.35	0.00168919	7.72698	0.0017093	0.0933682	0.00169904	9.71395e-11	0.00100341			3.57779e-06	4.66761e-06	6.05662e-06	7.81669e-06	1.00339e-05	1.28108e-05	1.62682e-05	2.05474e-05	2.58126e-05	3.17774e-05	4.00822e-05	4.42602e-05	3.43214e-05	3.02809e-05	2.65592e-05	2.36043e-05	2.12848e-05	1.97135e-05	1.87043e-05	1.81284e-05	1.79423e-05	1.80915e-05	1.84792e-05	1.91112e-05	2.00211e-05	2.10714e-05	2.2262e-05	2.36055e-05	2.50708e-05	2.66236e-05	2.64031e-05	1.87623e-05	5.58022e-06	2.94631e-06	2.78338e-06	2.82713e-06	2.95316e-06	3.10955e-06	3.20728e-06	3.37789e-06
196.5	0.00182552	7.84314	0.0023126	0.126323	0.00184394	3.39359e-10	0.00101701			3.57779e-06	4.66761e-06	6.05662e-06	7.81669e-06	1.00339e-05	1.28108e-05	1.62682e-05	2.05474e-05	2.58126e-05	3.22525e-05	3.94917e-05	4.95446e-05	5.44145e-05	4.19684e-05	3.68283e-05	3.21282e-05	2.84e-05	2.54714e-05	2.34641e-05	2.21431e-05	2.13458e-05	2.10129e-05	2.10737e-05	2.14095e-05	2.20225e-05	2.29469e-05	2.40207e-05	2.52413e-05	2.66206e-05	2.8121e-05	2.97019e-05	2.92974e-05	2.0707e-05	6.12546e-06	3.21679e-06	3.02254e-06	3.05353e-06	3.17249e-06	3.32252e-06	3.4085e-06
197.65	0.00201748	7.96284	0.00315912	0.172563	0.00201218	2.80794e-11	0.00103228			3.57779e-06	4.66761e-06	6.05662e-06	7.81669e-06	1.00339e-05	1.28108e-05	1.62682e-05	2.05474e-05	2.58126e-05	3.22525e-05	4.00822e-05	4.88146e-05	6.09112e-05	6.65384e-05	5.10431e-05	4.45505e-05	3.86556e-05	3.39862e-05	3.03174e-05	2.77779e-05	2.6073e-05	2.49989e-05	2.44767e-05	2.44153e-05	2.46709e-05	2.52407e-05	2.61587e-05	2.72354e-05	2.84654e-05	2.98593e-05	3.13724e-05	3.29579e-05	3.2334e-05	2.27302e-05	6.68778e-06	3.4932e-06	3.26459e-06	3.28032e-06	3.38977e-06	3.53097e-06
198.8	0.0022342	8.08625	0.00345849	0.188916	0.00219914	1.22896e-09	0.00103677			3.57779e-06	4.66761e-06	6.05662e-06	7.81669e-06	1.00339e-05	1.28108e-05	1.62682e-05	2.05474e-05	2.58126e-05	3.22525e-05	4.00822e-05	4.95446e-05	6.00138e-05	7.44825e-05	8.09256e-05	6.17457e-05	5.36018e-05	4.6259e-05	4.04522e-05	3.58913e-05	3.27079e-05	3.05352e-05	2.91197e-05	2.8358e-05	2.81347e-05	2.82762e-05	2.87736e-05	2.96595e-05	3.07141e-05	3.19285e-05	3.33117e-05	3.48115e-05	3.63739e-05	3.54934e-05	2.48169e-05	7.26244e-06	3.77294e-06	3.50705e-06	3.50498e-06	3.60244e-06
199.95	0.00251546	8.21355	0.00435041	0.237636	0.0024171	9.67461e-09	0.00104438			3.57779e-06	4.66761e-06	6.05662e-06	7.81669e-06	1.00339e-05	1.28108e-05	1.62682e-05	2.05474e-05	2.58126e-05	3.22525e-05	4.00822e-05	4.95446e-05	6.09112e-05	7.33852e-05	9.05875e-05	9.78941e-05	7.42906e-05	6.4145e-05	5.506e-05	4.78893e-05	4.22612e-05	3.83056e-05	3.55685e-05	3.37372e-05	3.26779e-05	3.22461e-05	3.22339e-05	3.26244e-05	3.34479e-05	3.44508e-05	3.56202e-05	3.69634e-05	3.84196e-05	3.9928e-05	3.87517e-05	2.69493e-05	7.84403e-06	4.05315e-06	3.74724e-06	3.72488e-06
201.1	0.00286826	8.34492	0.00528648	0.288767	0.00267076	3.90054e-08	0.0010558			3.57779e-06	4.66761e-06	6.05662e-06	7.81669e-06	1.00339e-05	1.28108e-05	1.62682e-05	2.05474e-05	2.58126e-05	3.22525e-05	4.00822e-05	4.95446e-05	6.09112e-05	7.44825e-05	8.92529e-05	0.000109582	0.000117783	8.89032e-05	7.63489e-05	6.51827e-05	5.63886e-05	4.94939e-05	4.46199e-05	4.12086e-05	3.88766e-05	3.74532e-05	3.67594e-05	3.65477e-05	3.67915e-05	3.75172e-05	3.84342e-05	3.95249e-05	4.07946e-05	4.21736e-05	4.35934e-05	4.20815e-05	2.91075e-05	8.42661e-06	4.33075e-06	3.98234e-06
202.25	0.0032816	8.48057	0.0059971	0.327584	0.0029581	1.04654e-07	0.00105956			3.57779e-06	4.66761e-06	6.05662e-06	7.81669e-06	1.00339e-05	1.28108e-05	1.62682e-05	2.05474e-05	2.58126e-05	3.22525e-05	4.00822e-05	4.95446e-05	6.09112e-05	7.44825e-05	9.05875e-05	0.000107967	0.000131846	0.00014095	0.000105817	9.03856e-05	7.67512e-05	6.6039e-05	5.76524e-05	5.16952e-05	4.74862e-05	4.45578e-05	4.26954e-05	4.1679e-05	4.1216e-05	4.12675e-05	4.1855e-05	4.26473e-05	4.36216e-05	4.47806e-05	4.60452e-05	4.73393e-05	4.54515e-05	3.12693e-05	9.00373e-06	4.60245e-06
203.4	0.00378748	8.62069	0.007103	0.387992	0.00329721	2.40356e-07	0.00107819			3.57779e-06	4.66761e-06	6.05662e-06	7.81669e-06	1.00339e-05	1.28108e-05	1.62682e-05	2.05474e-05	2.58126e-05	3.22525e-05	4.00822e-05	4.95446e-05	6.09112e-05	7.44825e-05	9.05875e-05	0.000109582	0.000129903	0.000157779	0.000167767	0.000125272	0.000106427	8.98865e-05	7.69248e-05	6.67943e-05	5.95702e-05	5.44255e-05	5.07944e-05	4.84094e-05	4.70026e-05	4.62303e-05	4.6039e-05	4.64432e-05	4.70677e-05	4.78838e-05	4.88915e-05	5.00017e-05	5.11303e-05	4.88272e-05	3.34108e-05	9.56861e-06
204.55	0.00430996	8.76552	0.00709582	0.3876	0.00367905	3.98053e-07	0.00109026			3.57779e-06	4.66761e-06	6.05662e-06	7.81669e-06	1.00339e-05	1.28108e-05	1.62682e-05	2.05474e-05	2.58126e-05	3.22525e-05	4.00822e-05	4.95446e-05	6.09112e-05	7.44825e-05	9.05875e-05	0.000109582	0.000131846	0.000155454	0.000187797	0.000198611	0.000147505	0.000124641	0.000104703	8.91228e-05	7.69694e-05	6.82755e-05	6.20432e-05	5.75922e-05	5.45927e-05	5.2721e-05	5.15756e-05	5.10858e-05	5.1257e-05	5.16666e-05	5.22796e-05	5.30926e-05	5.40059e-05	5.49277e-05	5.21713e-05	3.5507e-05
205.7	0.00491369	8.9153	0.007926	0.432948	0.00410908	6.47399e-07	0.00109695			3.57779e-06	4.66761e-06	6.05662e-06	7.81669e-06	1.00339e-05	1.28108e-05	1.62682e-05	2.05474e-05	2.58126e-05	3.22525e-05	4.00822e-05	4.95446e-05	6.09112e-05	7.44825e-05	9.05875e-05	0.000109582	0.000131846	0.000157779	0.00018503	0.000222323	0.00023386	0.000172749	0.000145187	0.000121306	0.000102699	8.82173e-05	7.78317e-05	7.03465e-05	6.49484e-05	6.12344e-05	5.88168e-05	5.72294e-05	5.63808e-05	5.62652e-05	5.64097e-05	5.67718e-05	5.73443e-05	5.80169e-05	5.86896e-05	5.54444e-05
206.85	0.00556757	9.07029	0.00829352	0.453023	0.00459652	9.4295e-07	0.00110399			3.57779e-06	4.66761e-06	6.05662e-06	7.81669e-06	1.00339e-05	1.28108e-05	1.62682e-05	2.05474e-05	2.58126e-05	3.22525e-05	4.00822e-05	4.95446e-05	6.09112e-05	7.44825e-05	9.05875e-05	0.000109582	0.000131846	0.000157779	0.000187797	0.000219048	0.000261781	0.000273883	0.000201225	0.000168209	0.000139785	0.000117707	0.000100565	8.8248e-05	7.93318e-05	7.28501e-05	6.83146e-05	6.52643e-05	6.31611e-05	6.18897e-05	6.14305e-05	6.12568e-05	6.13182e-05	6.16033e-05	6.19904e-05	6.23717e-05
208	0.00626663	9.23077	0.00856092	0.467629	0.00514968	1.24757e-06	0.00111475			3.57779e-06	4.66761e-06	6.05662e-06	7.81669e-06	1.00339e-05	1.28108e-05	1.62682e-05	2.05474e-05	2.58126e-05	3.22525e-05	4.00822e-05	4.95446e-05	6.09112e-05	7.44825e-05	9.05875e-05	0.000109582	0.000131846	0.000157779	0.000187797	0.000222323	0.000257924	0.000306582	0.00031903	0.000233133	0.000193833	0.000160213	0.000134182	0.000114023	9.95199e-05	8.89834e-05	8.12733e-05	7.58032e-05	7.20288e-05	6.93325e-05	6.75713e-05	6.6709e-05	6.61623e-05	6.58723e-05	6.58224e-05	6.58796e-05
209.15	0.00704274	9.39702	0.00917124	0.500967	0.00577349	1.611e-06	0.00112739			3.57779e-06	4.66761e-06	6.05662e-06	7.81669e-06	1.00339e-05	1.28108e-05	1.62682e-05	2.05474e-05	2.58126e-05	3.22525e-05	4.00822e-05	4.95446e-05	6.09112e-05	7.44825e-05	9.05875e-05	0.000109582	0.000131846	0.000157779	0.000187797	0.000222323	0.000261781	0.000302066	0.000357119	0.000369618	0.000268647	0.000222159	0.000182637	0.00015214	0.000128587	0.000111627	9.9272e-05	9.01825e-05	8.36601e-05	7.90667e-05	7.56974e-05	7.33775e-05	7.20512e-05	7.10762e-05	7.03838e-05	6.9952e-05
210.3	0.00785829	9.56938	0.00929317	0.507628	0.00647516	1.91305e-06	0.00114526			3.57779e-06	4.66761e-06	6.05662e-06	7.81669e-06	1.00339e-05	1.28108e-05	1.62682e-05	2.05474e-05	2.58126e-05	3.22525e-05	4.00822e-05	4.95446e-05	6.09112e-05	7.44825e-05	9.05875e-05	0.000109582	0.000131846	0.000157779	0.000187797	0.000222323	0.000261781	0.000306582	0.000351858	0.000413748	0.000425924	0.000307906	0.000253254	0.00020708	0.000171573	0.000144231	0.000124534	0.000110154	9.95298e-05	9.18345e-05	8.63252e-05	8.22018e-05	7.92537e-05	7.74024e-05	7.59441e-05	7.47995e-05
211.45	0.00878495	9.74817	0.0101755	0.555824	0.00725029	2.35517e-06	0.00115212			3.57779e-06	4.66761e-06	6.05662e-06	7.81669e-06	1.00339e-05	1.28108e-05	1.62682e-05	2.05474e-05	2.58126e-05	3.22525e-05	4.00822e-05	4.95446e-05	6.09112e-05	7.44825e-05	9.05875e-05	0.000109582	0.000131846	0.000157779	0.000187797	0.000222323	0.000261781	0.000306582	0.000357119	0.000407652	0.000476776	0.000488166	0.000351002	0.000287147	0.00023353	0.000192446	0.000160908	0.000138186	0.000121572	0.000109255	0.000100265	9.37428e-05	8.87847e-05	8.51398e-05	8.27036e-05	8.07087e-05
212.6	0.00980512	9.93377	0.0107877	0.589266	0.00811524	2.85571e-06	0.00116503			3.57779e-06	4.66761e-06	6.05662e-06	7.81669e-06	1.00339e-05	1.28108e-05	1.62682e-05	2.05474e-05	2.58126e-05	3.22525e-05	4.00822e-05	4.95446e-05	6.09112e-05	7.44825e-05	9.05875e-05	0.000109582	0.000131846	0.000157779	0.000187797	0.000222323	0.000261781	0.000306582	0.000357119	0.000413748	0.000469752	0.000546449	0.000556492	0.000397977	0.000323824	0.000261941	0.000214698	0.000178547	0.000152509	0.00013345	0.000119285	0.00010888	0.00010125	9.53787e-05	9.09709e-05	8.78922e-05
213.75	0.0109006	10.1266	0.0111467	0.608877	0.00906402	3.37289e-06	0.00116387			3.57779e-06	4.66761e-06	6.05662e-06	7.81669e-06	1.00339e-05	1.28108e-05	1.62682e-05	2.05474e-05	2.58126e-05	3.22525e-05	4.00822e-05	4.95446e-05	6.09112e-05	7.44825e-05	9.05875e-05	0.000109582	0.000131846	0.000157779	0.000187797	0.000222323	0.000261781	0.000306582	0.000357119	0.000413748	0.000476776	0.000538399	0.000622933	0.000630968	0.000448811	0.00036322	0.000292228	0.000238233	0.000197053	0.00016741	0.000145701	0.000129534	0.0001176	0.00010877	0.000101911	9.66783e-05
214.9	0.0120766	10.327	0.0115067	0.628541	0.010119	3.83215e-06	0.00117655			3.57779e-06	4.66761e-06	6.05662e-06	7.81669e-06	1.00339e-05	1.28108e-05	1.62682e-05	2.05474e-05	2.58126e-05	3.22525e-05	4.00822e-05	4.95446e-05	6.09112e-05	7.44825e-05	9.05875e-05	0.000109582	0.000131846	0.000157779	0.000187797	0.000222323	0.000261781	0.000306582	0.000357119	0.000413748	0.000476776	0.000546449	0.000613756	0.000706301	0.000711562	0.000503413	0.000405217	0.000324262	0.000262925	0.000216307	0.000182779	0.000158221	0.000139908	0.000126334	0.000116219	0.000108305
216.05	0.0133026	10.5356	0.0115256	0.629569	0.011278	4.09899e-06	0.00119248			3.57779e-06	4.66761e-06	6.05662e-06	7.81669e-06	1.00339e-05	1.28108e-05	1.62682e-05	2.05474e-05	2.58126e-05	3.22525e-05	4.00822e-05	4.95446e-05	6.09112e-05	7.44825e-05	9.05875e-05	0.000109582	0.000131846	0.000157779	0.000187797	0.000222323	0.000261781	0.000306582	0.000357119	0.000413748	0.000476776	0.000546449	0.000622933	0.000695896	0.000796516	0.00079813	0.00056162	0.000449637	0.000357871	0.000288615	0.000236164	0.000198484	0.000170891	0.000150298	0.000134986	0.000123511
217.2	0.0146534	10.7527	0.0121908	0.665909	0.0125446	4.4468e-06	0.00121086			3.57779e-06	4.66761e-06	6.05662e-06	7.81669e-06	1.00339e-05	1.28108e-05	1.62682e-05	2.05474e-05	2.58126e-05	3.22525e-05	4.00822e-05	4.95446e-05	6.09112e-05	7.44825e-05	9.05875e-05	0.000109582	0.000131846	0.000157779	0.000187797	0.000222323	0.000261781	0.000306582	0.000357119	0.000413748	0.000476776	0.000546449	0.000622933	0.000706301	0.000784782	0.000893421	0.000890413	0.000623185	0.000496241	0.000392838	0.000315111	0.000256457	0.000214379	0.000183583	0.000160592	0.000143455
218.35	0.0160827	10.979	0.012373	0.675861	0.0139199	4.67743e-06	0.00122669			3.57779e-06	4.66761e-06	6.05662e-06	7.81669e-06	1.00339e-05	1.28108e-05	1.62682e-05	2.05474e-05	2.58126e-05	3.22525e-05	4.00822e-05	4.95446e-05	6.09112e-05	7.44825e-05	9.05875e-05	0.000109582	0.000131846	0.000157779	0.000187797	0.000222323	0.000261781	0.000306582	0.000357119	0.000413748	0.000476776	0.000546449	0.000622933	0.000706301	0.000796516	0.000880258	0.000996722	0.00098802	0.000687777	0.000544729	0.000428901	0.000342187	0.000276995	0.000230301	0.000196157	0.000170667
219.5	0.0175606	11.215	0.0122614	0.669763	0.0154041	4.65058e-06	0.00123515			3.57779e-06	4.66761e-06	6.05662e-06	7.81669e-06	1.00339e-05	1.28108e-05	1.62682e-05	2.05474e-05	2.58126e-05	3.22525e-05	4.00822e-05	4.95446e-05	6.09112e-05	7.44825e-05	9.05875e-05	0.000109582	0.000131846	0.000157779	0.000187797	0.000222323	0.000261781	0.000306582	0.000357119	0.000413748	0.000476776	0.000546449	0.000622933	0.000706301	0.000796516	0.000893421	0.000982037	0.00110598	0.00109043	0.000754979	0.000594736	0.000465755	0.00036959	0.000297567	0.000246074	0.000208463
220.65	0.0191605	11.4613	0.0127091	0.694219	0.0170022	4.65819e-06	0.00124164			3.57779e-06	4.66761e-06	6.05662e-06	7.81669e-06	1.00339e-05	1.28108e-05	1.62682e-05	2.05474e-05	2.58126e-05	3.22525e-05	4.00822e-05	4.95446e-05	6.09112e-05	7.44825e-05	9.05875e-05	0.000109582	0.000131846	0.000157779	0.000187797	0.000222323	0.000261781	0.000306582	0.000357119	0.000413748	0.000476776	0.000546449	0.000622933	0.000706301	0.000796516	0.000893421	0.000996722	0.00108969	0.00122062	0.00119697	0.000824287	0.000645839	0.000503054	0.00039704	0.000317947	0.000261512
221.8	0.0208246	11.7188	0.0126444	0.690684	0.0187251	4.40803e-06	0.00126218			3.57779e-06	4.66761e-06	6.05662e-06	7.81669e-06	1.00339e-05	1.28108e-05	1.62682e-05	2.05474e-05	2.58126e-05	3.22525e-05	4.00822e-05	4.95446e-05	6.09112e-05	7.44825e-05	9.05875e-05	0.000109582	0.000131846	0.000157779	0.000187797	0.000222323	0.000261781	0.000306582	0.000357119	0.000413748	0.000476776	0.000546449	0.000622933	0.000706301	0.000796516	0.000893421	0.000996722	0.00110598	0.00120263	0.00133988	0.00130686	0.000895115	0.00069756	0.000540416	0.000424232	0.000337894
222.95	0.0225535	11.988	0.0125532	0.685703	0.0205628	3.96283e-06	0.00128036			3.57779e-06	4.66761e-06	6.05662e-06	7.81669e-06	1.00339e-05	1.28108e-05	1.62682e-05	2.05474e-05	2.58126e-05	3.22525e-05	4.00822e-05	4.95446e-05	6.09112e-05	7.44825e-05	9.05875e-05	0.000109582	0.000131846	0.000157779	0.000187797	0.000222323	0.000261781	0.000306582	0.000357119	0.000413748	0.000476776	0.000546449	0.000622933	0.000706301	0.000796516	0.000893421	0.000996722	0.00110598	0.00122062	0.00132014	0.00146289	0.00141915	0.000966798	0.000749367	0.000577428	0.000450848
224.1	0.0243038	12.2699	0.0121312	0.662652	0.022517	3.19264e-06	0.00130059			3.57779e-06	4.66761e-06	6.05662e-06	7.81669e-06	1.00339e-05	1.28108e-05	1.62682e-05	2.05474e-05	2.58126e-05	3.22525e-05	4.00822e-05	4.95446e-05	6.09112e-05	7.44825e-05	9.05875e-05	0.000109582	0.000131846	0.000157779	0.000187797	0.000222323	0.000261781	0.000306582	0.000357119	0.000413748	0.000476776	0.000546449	0.000622933	0.000706301	0.000796516	0.000893421	0.000996722	0.00110598	0.00122062	0.00133988	0.00144133	0.00158859	0.0015328	0.0010386	0.00080069	0.000613655
225.25	0.0261895	12.5654	0.012463	0.680775	0.0245764	2.6021e-06	0.00130886			3.57779e-06	4.66761e-06	6.05662e-06	7.81669e-06	1.00339e-05	1.28108e-05	1.62682e-05	2.05474e-05	2.58126e-05	3.22525e-05	4.00822e-05	4.95446e-05	6.09112e-05	7.44825e-05	9.05875e-05	0.000109582	0.000131846	0.000157779	0.000187797	0.000222323	0.000261781	0.000306582	0.000357119	0.000413748	0.000476776	0.000546449	0.000622933	0.000706301	0.000796516	0.000893421	0.000996722	0.00110598	0.00122062	0.00133988	0.00146289	0.00156518	0.0017158	0.00164664	0.00110973	0.000850924
226.4	0.0281416	12.8755	0.0122868	0.671153	0.0267495	1.93802e-06	0.00132486			3.57779e-06	4.66761e-06	6.05662e-06	7.81669e-06	1.00339e-05	1.28108e-05	1.62682e-05	2.05474e-05	2.58126e-05	3.22525e-05	4.00822e-05	4.95446e-05	6.09112e-05	7.44825e-05	9.05875e-05	0.000109582	0.000131846	0.000157779	0.000187797	0.000222323	0.000261781	0.000306582	0.000357119	0.000413748	0.000476776	0.000546449	0.000622933	0.000706301	0.000796516	0.000893421	0.000996722	0.00110598	0.00122062	0.00133988	0.00146289	0.00158859	0.00169052	0.00184323	0.00175941	0.00117936
227.55	0.0301623	13.2013	0.012099	0.660893	0.0290321	1.27722e-06	0.00135091			3.57779e-06	4.66761e-06	6.05662e-06	7.81669e-06	1.00339e-05	1.28108e-05	1.62682e-05	2.05474e-05	2.58126e-05	3.22525e-05	4.00822e-05	4.95446e-05	6.09112e-05	7.44825e-05	9.05875e-05	0.000109582	0.000131846	0.000157779	0.000187797	0.000222323	0.000261781	0.000306582	0.000357119	0.000413748	0.000476776	0.000546449	0.000622933	0.000706301	0.000796516	0.000893421	0.000996722	0.00110598	0.00122062	0.00133988	0.00146289	0.00158859	0.0017158	0.00181608	0.00196947	0.0018698
228.7	0.0321729	13.544	0.0114372	0.624741	0.0314061	5.88055e-07	0.00136679			3.57779e-06	4.66761e-06	6.05662e-06	7.81669e-06	1.00339e-05	1.28108e-05	1.62682e-05	2.05474e-05	2.58126e-05	3.22525e-05	4.00822e-05	4.95446e-05	6.09112e-05	7.44825e-05	9.05875e-05	0.000109582	0.000131846	0.000157779	0.000187797	0.000222323	0.000261781	0.000306582	0.000357119	0.000413748	0.000476776	0.000546449	0.000622933	0.000706301	0.000796516	0.000893421	0.000996722	0.00110598	0.00122062	0.00133988	0.00146289	0.00158859	0.0017158	0.00184323	0.00194046	0.00209304
229.85	0.0343268	13.905	0.0116244	0.634965	0.0338774	2.02006e-07	0.00139542			3.57779e-06	4.66761e-06	6.05662e-06	7.81669e-06	1.00339e-05	1.28108e-05	1.62682e-05	2.05474e-05	2.58126e-05	3.22525e-05	4.00822e-05	4.95446e-05	6.09112e-05	7.44825e-05	9.05875e-05	0.000109582	0.000131846	0.000157779	0.000187797	0.000222323	0.000261781	0.000306582	0.000357119	0.000413748	0.000476776	0.000546449	0.000622933	0.000706301	0.000796516	0.000893421	0.000996722	0.00110598	0.00122062	0.00133988	0.00146289	0.00158859	0.0017158	0.00184323	0.00196947	0.0020622
231	0.0365556	14.2857	0.0113958	0.622482	0.0364115	2.07494e-08	0.0013924			3.57779e-06	4.66761e-06	6.05662e-06	7.81669e-06	1.00339e-05	1.28108e-05	1.62682e-05	2.05474e-05	2.58126e-05	3.22525e-05	4.00822e-05	4.95446e-05	6.09112e-05	7.44825e-05	9.05875e-05	0.000109582	0.000131846	0.000157779	0.000187797	0.000222323	0.000261781	0.000306582	0.000357119	0.000413748	0.000476776	0.000546449	0.000622933	0.000706301	0.000796516	0.000893421	0.000996722	0.00110598	0.00122062	0.00133988	0.00146289	0.00158859	0.0017158	0.00184323	0.00196947	0.00209304
232.15	0.0388655	14.6879	0.0111726	0.610291	0.0390488	3.36072e-08	0.00143073			3.57779e-06	4.66761e-06	6.05662e-06	7.81669e-06	1.00339e-05	1.28108e-05	1.62682e-05	2.05474e-05	2.58126e-05	3.22525e-05	4.00822e-05	4.95446e-05	6.09112e-05	7.44825e-05	9.05875e-05	0.000109582	0.000131846	0.000157779	0.000187797	0.000222323	0.000261781	0.000306582	0.000357119	0.000413748	0.000476776	0.000546449	0.000622933	0.000706301	0.000796516	0.000893421	0.000996722	0.00110598	0.00122062	0.00133988	0.00146289	0.00158859	0.0017158	0.00184323	0.00196947	0.00209304
233.3	0.0410516	15.1134	0.0099873	0.545543	0.0417709	5.17254e-07	0.00144408			3.57779e-06	4.66761e-06	6.05662e-06	7.81669e-06	1.00339e-05	1.28108e-05	1.62682e-05	2.05474e-05	2.58126e-05	3.22525e-05	4.00822e-05	4.95446e-05	6.09112e-05	7.44825e-05	9.05875e-05	0.000109582	0.000131846	0.000157779	0.000187797	0.000222323	0.000261781	0.000306582	0.000357119	0.000413748	0.000476776	0.000546449	0.000622933	0.000706301	0.000796516	0.000893421	0.000996722	0.00110598	0.00122062	0.00133988	0.00146289	0.00158859	0.0017158	0.00184323	0.00196947	0.00209304
234.45	0.0435338	15.5642	0.010692	0.584035	0.0447159	1.39738e-06	0.00146576			3.57779e-06	4.66761e-06	6.05662e-06	7.81669e-06	1.00339e-05	1.28108e-05	1.62682e-05	2.05474e-05	2.58126e-05	3.22525e-05	4.00822e-05	4.95446e-05	6.09112e-05	7.44825e-05	9.05875e-05	0.000109582	0.000131846	0.000157779	0.000187797	0.000222323	0.000261781	0.000306582	0.000357119	0.000413748	0.000476776	0.000546449	0.000622933	0.000706301	0.000796516	0.000893421	0.000996722	0.00110598	0.00122062	0.00133988	0.00146289	0.00158859	0.0017158	0.00184323	0.00196947	0.00209304
235.6	0.0461833	16.0428	0.0107422	0.586777	0.0481458	3.8515e-06	0.00147927			3.57779e-06	4.66761e-06	6.05662e-06	7.81669e-06	1.00339e-05	1.28108e-05	1.62682e-05	2.05474e-05	2.58126e-05	3.22525e-05	4.00822e-05	4.95446e-05	6.09112e-05	7.44825e-05	9.05875e-05	0.000109582	0.000131846	0.000157779	0.000187797	0.000222323	0.000261781	0.000306582	0.000357119	0.000413748	0.000476776	0.000546449	0.000622933	0.000706301	0.000796516	0.000893421	0.000996722	0.00110598	0.00122062	0.00133988	0.00146289	0.00158859	0.0017158	0.00184323	0.00196947	0.00209304
236.75	0.0489518	16.5517	0.0105446	0.575988	0.0522708	1.1016e-05	0.0015017			3.57779e-06	4.66761e-06	6.05662e-06	7.81669e-06	1.00339e-05	1.28108e-05	1.62682e-05	2.05474e-05	2.58126e-05	3.22525e-05	4.00822e-05	4.95446e-05	6.09112e-05	7.44825e-05	9.05875e-05	0.000109582	0.000131846	0.000157779	0.000187797	0.000222323	0.000261781	0.000306582	0.000357119	0.000413748	0.000476776	0.000546449	0.000622933	0.000706301	0.000796516	0.000893421	0.000996722	0.00110598	0.00122062	0.00133988	0.00146289	0.00158859	0.0017158	0.00184323	0.00196947	0.00209304
237.9	0.0518436	17.094	0.0103268	0.564089	0.056779	2.43588e-05	0.0015271			3.57779e-06	4.66761e-06	6.05662e-06	7.81669e-06	1.00339e-05	1.28108e-05	1.62682e-05	2.05474e-05	2.58126e-05	3.22525e-05	4.00822e-05	4.95446e-05	6.09112e-05	7.44825e-05	9.05875e-05	0.000109582	0.000131846	0.000157779	0.000187797	0.000222323	0.000261781	0.000306582	0.000357119	0.000413748	0.000476776	0.000546449	0.000622933	0.000706301	0.000796516	0.000893421	0.000996722	0.00110598	0.00122062	0.00133988	0.00146289	0.00158859	0.0017158	0.00184323	0.00196947	0.00209304
239.05	0.0547903	17.673	0.00984456	0.537746	0.0610302	3.89367e-05	0.00155524			3.57779e-06	4.66761e-06	6.05662e-06	7.81669e-06	1.00339e-05	1.28108e-05	1.62682e-05	2.05474e-05	2.58126e-05	3.22525e-05	4.00822e-05	4.95446e-05	6.09112e-05	7.44825e-05	9.05875e-05	0.000109582	0.000131846	0.000157779	0.000187797	0.000222323	0.000261781	0.000306582	0.000357119	0.000413748	0.000476776	0.000546449	0.000622933	0.000706301	0.000796516	0.000893421	0.000996722	0.00110598	0.00122062	0.00133988	0.00146289	0.00158859	0.0017158	0.00184323	0.00196947	0.00209304
240.2	0.0581237	18.2927	0.0103948	0.567805	0.0647243	4.35677e-05	0.00157012			3.57779e-06	4.66761e-06	6.05662e-06	7.81669e-06	1.00339e-05	1.28108e-05	1.62682e-05	2.05474e-05	2.58126e-05	3.22525e-05	4.00822e-05	4.95446e-05	6.09112e-05	7.44825e-05	9.05875e-05	0.000109582	0.000131846	0.000157779	0.000187797	0.000222323	0.000261781	0.000306582	0.000357119	0.000413748	0.000476776	0.000546449	0.000622933	0.000706301	0.000796516	0.000893421	0.000996722	0.00110598	0.00122062	0.00133988	0.00146289	0.00158859	0.0017158	0.00184323	0.00196947	0.00209304
241.35	0.0616922	18.9573	0.0103612	0.565968	0.0680603	4.05527e-05	0.00161387			3.57779e-06	4.66761e-06	6.05662e-06	7.81669e-06	1.00339e-05	1.28108e-05	1.62682e-05	2.05474e-05	2.58126e-05	3.22525e-05	4.00822e-05	4.95446e-05	6.09112e-05	7.44825e-05	9.05875e-05	0.000109582	0.000131846	0.000157779	0.000187797	0.000222323	0.000261781	0.000306582	0.000357119	0.000413748	0.000476776	0.000546449	0.000622933	0.000706301	0.000796516	0.000893421	0.000996722	0.00110598	0.00122062	0.00133988	0.00146289	0.00158859	0.0017158	0.00184323	0.00196947	0.00209304
242.5	0.0655471	19.6721	0.0103944	0.567778	0.0712562	3.25935e-05	0.0016285			3.57779e-06	4.66761e-06	6.05662e-06	7.81669e-06	1.00339e-05	1.28108e-05	1.62682e-05	2.05474e-05	2.58126e-05	3.22525e-05	4.00822e-05	4.95446e-05	6.09112e-05	7.44825e-05	9.05875e-05	0.000109582	0.000131846	0.000157779	0.000187797	0.000222323	0.000261781	0.000306582	0.000357119	0.000413748	0.000476776	0.000546449	0.000622933	0.000706301	0.000796516	0.000893421	0.000996722	0.00110598	0.00122062	0.00133988	0.00146289	0.00158859	0.0017158	0.00184323	0.00196947	0.00209304
243.65	0.0695948	20.4429	0.0101067	0.552066	0.0744865	2.39288e-05	0.00168701			3.57779e-06	4.66761e-06	6.05662e-06	7.81669e-06	1.00339e-05	1.28108e-05	1.62682e-05	2.05474e-05	2.58126e-05	3.22525e-05	4.00822e-05	4.95446e-05	6.09112e-05	7.44825e-05	9.05875e-05	0.000109582	0.000131846	0.000157779	0.000187797	0.000222323	0.000261781	0.000306582	0.000357119	0.000413748	0.000476776	0.000546449	0.000622933	0.000706301	0.000796516	0.000893421	0.000996722	0.00110598	0.00122062	0.00133988	0.00146289	0.00158859	0.0017158	0.00184323	0.00196947	0.00209304
244.8	0.0742951	21.2766	0.0108344	0.591816	0.0777599	1.20045e-05	0.00172115			3.57779e-06	4.66761e-06	6.05662e-06	7.81669e-06	1.00339e-05	1.28108e-05	1.62682e-05	2.05474e-05	2.58126e-05	3.22525e-05	4.00822e-05	4.95446e-05	6.09112e-05	7.44825e-05	9.05875e-05	0.000109582	0.000131846	0.000157779	0.000187797	0.000222323	0.000261781	0.000306582	0.000357119	0.000413748	0.000476776	0.000546449	0.000622933	0.000706301	0.000796516	0.000893421	0.000996722	0.00110598	0.00122062	0.00133988	0.00146289	0.00158859	0.0017158	0.00184323	0.00196947	0.00209304
245.95	0.0795048	22.1811	0.0110491	0.603544	0.0811489	2.70311e-06	0.00177965			3.57779e-06	4.66761e-06	6.05662e-06	7.81669e-06	1.00339e-05	1.28108e-05	1.62682e-05	2.05474e-05	2.58126e-05	3.22525e-05	4.00822e-05	4.95446e-05	6.09112e-05	7.44825e-05	9.05875e-05	0.000109582	0.000131846	0.000157779	0.000187797	0.000222323	0.000261781	0.000306582	0.000357119	0.000413748	0.000476776	0.000546449	0.000622933	0.000706301	0.000796516	0.000893421	0.000996722	0.00110598	0.00122062	0.00133988	0.00146289	0.00158859	0.0017158	0.00184323	0.00196947	0.00209304
247.1	0.0853529	23.166	0.0113709	0.621119	0.0847463	3.67997e-07	0.00190266			3.57779e-06	4.66761e-06	6.05662e-06	7.81669e-06	1.00339e-05	1.28108e-05	1.62682e-05	2.05474e-05	2.58126e-05	3.22525e-05	4.00822e-05	4.95446e-05	6.09112e-05	7.44825e-05	9.05875e-05	0.000109582	0.000131846	0.000157779	0.000187797	0.000222323	0.000261781	0.000306582	0.000357119	0.000413748	0.000476776	0.000546449	0.000622933	0.000706301	0.000796516	0.000893421	0.000996722	0.00110598	0.00122062	0.00133988	0.00146289	0.00158859	0.0017158	0.00184323	0.00196947	0.00209304
248.25	0.0918175	24.2424	0.0114781	0.626977	0.0887444	9.44365e-06	0.00219894			3.57779e-06	4.66761e-06	6.05662e-06	7.81669e-06	1.00339e-05	1.28108e-05	1.62682e-05	2.05474e-05	2.58126e-05	3.22525e-05	4.00822e-05	4.95446e-05	6.09112e-05	7.44825e-05	9.05875e-05	0.000109582	0.000131846	0.000157779	0.000187797	0.000222323	0.000261781	0.000306582	0.000357119	0.000413748	0.000476776	0.000546449	0.000622933	0.000706301	0.000796516	0.000893421	0.000996722	0.00110598	0.00122062	0.00133988	0.00146289	0.00158859	0.0017158	0.00184323	0.00196947	0.00209304
249.4	0.0995084	25.4237	0.0124161	0.678214	0.0945818	2.42712e-05	0.00457164			3.57779e-06	4.66761e-06	6.05662e-06	7.81669e-06	1.00339e-05	1.28108e-05	1.62682e-05	2.05474e-05	2.58126e-05	3.22525e-05	4.00822e-05	4.95446e-05	6.09112e-05	7.44825e-05	9.05875e-05	0.000109582	0.000131846	0.000157779	0.000187797	0.000222323	0.000261781	0.000306582	0.000357119	0.000413748	0.000476776	0.000546449	0.000622933	0.000706301	0.000796516	0.000893421	0.000996722	0.00110598	0.00122062	0.00133988	0.00146289	0.00158859	0.0017158	0.00184323	0.00196947	0.00209304
250.55	0.108428	26.7261	0.0130303	0.711765	0.107213	1.47729e-06	0.0169643			3.57779e-06	4.66761e-06	6.05662e-06	7.81669e-06	1.00339e-05	1.28108e-05	1.62682e-05	2.05474e-05	2.58126e-05	3.22525e-05	4.00822e-05	4.95446e-05	6.09112e-05	7.44825e-05	9.05875e-05	0.000109582	0.000131846	0.000157779	0.000187797	0.000222323	0.000261781	0.000306582	0.000357119	0.000413748	0.000476776	0.000546449	0.000622933	0.000706301	0.000796516	0.000893421	0.000996722	0.00110598	0.00122062	0.00133988	0.00146289	0.00158859	0.0017158	0.00184323	0.00196947	0.00209304
251.7	0.118444	28.169	0.013172	0.719503	0.118916	2.22779e-07	0.0264899			3.57779e-06	4.66761e-06	6.05662e-06	7.81669e-06	1.00339e-05	1.28108e-05	1.62682e-05	2.05474e-05	2.58126e-05	3.22525e-05	4.00822e-05	4.95446e-05	6.09112e-05	7.44825e-05	9.05875e-05	0.000109582	0.000131846	0.000157779	0.000187797	0.000222323	0.000261781	0.000306582	0.000357119	0.000413748	0.000476776	0.000546449	0.000622933	0.000706301	0.000796516	0.000893421	0.000996722	0.00110598	0.00122062	0.00133988	0.00146289	0.00158859	0.0017158	0.00184323	0.00196947	0.00209304
252.85	0.130412	29.7767	0.0140848	0.769365	0.128193	4.92587e-06	0.0297996			3.57779e-06	4.66761e-06	6.05662e-06	7.81669e-06	1.00339e-05	1.28108e-05	1.62682e-05	2.05474e-05	2.58126e-05	3.22525e-05	4.00822e-05	4.95446e-05	6.09112e-05	7.44825e-05	9.05875e-05	0.000109582	0.000131846	0.000157779	0.000187797	0.000222323	0.000261781	0.000306582	0.000357119	0.000413748	0.000476776	0.000546449	0.000622933	0.000706301	0.000796516	0.000893421	0.000996722	0.00110598	0.00122062	0.00133988	0.00146289	0.00158859	0.0017158	0.00184323	0.00196947	0.00209304
254	0.144452	31.5789	0.0146903	0.802439	0.138695	3.3137e-05	0.0314756			3.57779e-06	4.66761e-06	6.05662e-06	7.81669e-06	1.00339e-05	1.28108e-05	1.62682e-05	2.05474e-05	2.58126e-05	3.22525e-05	4.00822e-05	4.95446e-05	6.09112e-05	7.44825e-05	9.05875e-05	0.000109582	0.000131846	0.000157779	0.000187797	0.000222323	0.000261781	0.000306582	0.000357119	0.000413748	0.000476776	0.000546449	0.000622933	0.000706301	0.000796516	0.000893421	0.000996722	0.00110598	0.00122062	0.00133988	0.00146289	0.00158859	0.0017158	0.00184323	0.00196947	0.00209304
255.15	0.1609	33.6134	0.015191	0.829788	0.152751	6.64099e-05	0.0334213			3.57779e-06	4.66761e-06	6.05662e-06	7.81669e-06	1.00339e-05	1.28108e-05	1.62682e-05	2.05474e-05	2.58126e-05	3.22525e-05	4.00822e-05	4.95446e-05	6.09112e-05	7.44825e-05	9.05875e-05	0.000109582	0.000131846	0.000157779	0.000187797	0.000222323	0.000261781	0.000306582	0.000357119	0.000413748	0.000476776	0.000546449	0.000622933	0.000706301	0.000796516	0.000893421	0.000996722	0.00110598	0.00122062	0.00133988	0.00146289	0.00158859	0.0017158	0.00184323	0.00196947	0.00209304
256.3	0.181211	35.9281	0.0164191	0.896873	0.172072	8.35204e-05	0.0357373			3.57779e-06	4.66761e-06	6.05662e-06	7.81669e-06	1.00339e-05	1.28108e-05	1.62682e-05	2.05474e-05	2.58126e-05	3.22525e-05	4.00822e-05	4.95446e-05	6.09112e-05	7.44825e-05	9.05875e-05	0.000109582	0.000131846	0.000157779	0.000187797	0.000222323	0.000261781	0.000306582	0.000357119	0.000413748	0.000476776	0.000546449	0.000622933	0.000706301	0.000796516	0.000893421	0.000996722	0.00110598	0.00122062	0.00133988	0.00146289	0.00158859	0.0017158	0.00184323	0.00196947	0.00209304
257.45	0.20586	38.5852	0.017276	0.943679	0.199218	4.41152e-05	0.0385606			3.57779e-06	4.66761e-06	6.05662e-06	7.81669e-06	1.00339e-05	1.28108e-05	1.62682e-05	2.05474e-05	2.58126e-05	3.22525e-05	4.00822e-05	4.95446e-05	6.09112e-05	7.44825e-05	9.05875e-05	0.000109582	0.000131846	0.000157779	0.000187797	0.000222323	0.000261781	0.000306582	0.000357119	0.000413748	0.000476776	0.000546449	0.000622933	0.000706301	0.000796516	0.000893421	0.000996722	0.00110598	0.00122062	0.00133988	0.00146289	0.00158859	0.0017158	0.00184323	0.00196947	0.00209304
258.6	0.235964	41.6667	0.0180934	0.988327	0.236896	8.70135e-07	0.0419927			3.57779e-06	4.66761e-06	6.05662e-06	7.81669e-06	1.00339e-05	1.28108e-05	1.62682e-05	2.05474e-05	2.58126e-05	3.22525e-05	4.00822e-05	4.95446e-05	6.09112e-05	7.44825e-05	9.05875e-05	0.000109582	0.000131846	0.000157779	0.000187797	0.000222323	0.000261781	0.000306582	0.000357119	0.000413748	0.000476776	0.000546449	0.000622933	0.000706301	0.000796516	0.000893421	0.000996722	0.00110598	0.00122062	0.00133988	0.00146289	0.00158859	0.0017158	0.00184323	0.00196947	0.00209304
259.75	0.271939	45.283	0.0183071	1	0.282763	0.000117151	0.0461904			3.57779e-06	4.66761e-06	6.05662e-06	7.81669e-06	1.00339e-05	1.28108e-05	1.62682e-05	2.05474e-05	2.58126e-05	3.22525e-05	4.00822e-05	4.95446e-05	6.09112e-05	7.44825e-05	9.05875e-05	0.000109582	0.000131846	0.000157779	0.000187797	0.000222323	0.000261781	0.000306582	0.000357119	0.000413748	0.000476776	0.000546449	0.000622933	0.000706301	0.000796516	0.000893421	0.000996722	0.00110598	0.00122062	0.00133988	0.00146289	0.00158859	0.0017158	0.00184323	0.00196947	0.00209304
260.9	0.315014	49.5868	0.01828	0.998521	0.325011	9.99309e-05	0.0517453			3.57779e-06	4.66761e-06	6.05662e-06	7.81669e-06	1.00339e-05	1.28108e-05	1.62682e-05	2.05474e-05	2.58126e-05	3.22525e-05	4.00822e-05	4.95446e-05	6.09112e-05	7.44825e-05	9.05875e-05	0.000109582	0.000131846	0.000157779	0.000187797	0.000222323	0.000261781	0.000306582	0.000357119	0.000413748	0.000476776	0.000546449	0.000622933	0.000706301	0.000796516	0.000893421	0.000996722	0.00110598	0.00122062	0.00133988	0.00146289	0.00158859	0.0017158	0.00184323	0.00196947	0.00209304
262.05	0.360523	54.7945	0.0158165	0.863957	0.352648	6.20245e-05	0.0590102			3.57779e-06	4.66761e-06	6.05662e-06	7.81669e-06	1.00339e-05	1.28108e-05	1.62682e-05	2.05474e-05	2.58126e-05	3.22525e-05	4.00822e-05	4.95446e-05	6.09112e-05	7.44825e-05	9.05875e-05	0.000109582	0.000131846	0.000157779	0.000187797	0.000222323	0.000261781	0.000306582	0.000357119	0.000413748	0.000476776	0.000546449	0.000622933	0.000706301	0.000796516	0.000893421	0.000996722	0.00110598	0.00122062	0.00133988	0.00146289	0.00158859	0.0017158	0.00184323	0.00196947	0.00209304
263.2	0.396997	61.2245	0.0101535	0.554622	0.367858	0.000849093	0.0685393			3.57779e-06	4.66761e-06	6.05662e-06	7.81669e-06	1.00339e-05	1.28108e-05	1.62682e-05	2.05474e-05	2.58126e-05	3.22525e-05	4.00822e-05	4.95446e-05	6.09112e-05	7.44825e-05	9.05875e-05	0.000109582	0.000131846	0.000157779	0.000187797	0.000222323	0.000261781	0.000306582	0.000357119	0.000413748	0.000476776	0.000546449	0.000622933	0.000706301	0.000796516	0.000893421	0.000996722	0.00110598	0.00122062	0.00133988	0.00146289	0.00158859	0.0017158	0.00184323	0.00196947	0.00209304
264.35	0.411701	69.3642	0.00318886	0.174188	0.379225	0.00105468	0.0815406			3.57779e-06	4.66761e-06	6.05662e-06	7.81669e-06	1.00339e-05	1.28108e-05	1.62682e-05	2.05474e-05	2.58126e-05	3.22525e-05	4.00822e-05	4.95446e-05	6.09112e-05	7.44825e-05	9.05875e-05	0.000109582	0.000131846	0.000157779	0.000187797	0.000222323	0.000261781	0.000306582	0.000357119	0.000413748	0.000476776	0.000546449	0.000622933	0.000706301	0.000796516	0.000893421	0.000996722	0.00110598	0.00122062	0.00133988	0.00146289	0.00158859	0.0017158	0.00184323	0.00196947	0.00209304
265.5	0.416105	80	0.000718059	0.039223	0.392075	0.000577433	0.0995985			3.57779e-06	4.66761e-06	6.05662e-06	7.81669e-06	1.00339e-05	1.28108e-05	1.62682e-05	2.05474e-05	2.58126e-05	3.22525e-05	4.00822e-05	4.95446e-05	6.09112e-05	7.44825e-05	9.05875e-05	0.000109582	0.000131846	0.000157779	0.000187797	0.000222323	0.000261781	0.000306582	0.000357119	0.000413748	0.000476776	0.000546449	0.000622933	0.000706301	0.000796516	0.000893421	0.000996722	0.00110598	0.00122062	0.00133988	0.00146289	0.00158859	0.0017158	0.00184323	0.00196947	0.00209304
266.65	0.419224	94.4882	0.000364528	0.0199119	0.409046	0.000103597	0.124944			3.57779e-06	4.66761e-06	6.05662e-06	7.81669e-06	1.00339e-05	1.28108e-05	1.62682e-05	2.05474e-05	2.58126e-05	3.22525e-05	4.00822e-05	4.95446e-05	6.09112e-05	7.44825e-05	9.05875e-05	0.000109582	0.000131846	0.000157779	0.000187797	0.000222323	0.000261781	0.000306582	0.000357119	0.000413748	0.000476776	0.000546449	0.000622933	0.000706301	0.000796516	0.000893421	0.000996722	0.00110598	0.00122062	0.00133988	0.00146289	0.00158859	0.0017158	0.00184323	0.00196947	0.00209304
267.8	0.422506	115.385	0.00025721	0.0140498	0.432987	0.000109864	0.161437			3.57779e-06	4.66761e-06	6.05662e-06	7.81669e-06	1.00339e-05	1.28108e-05	1.62682e-05	2.05474e-05	2.58126e-05	3.22525e-05	4.00822e-05	4.95446e-05	6.09112e-05	7.44825e-05	9.05875e-05	0.000109582	0.000131846	0.000157779	0.000187797	0.000222323	0.000261781	0.000306582	0.000357119	0.000413748	0.000476776	0.000546449	0.000622933	0.000706301	0.000796516	0.000893421	0.000996722	0.00110598	0.00122062	0.00133988	0.00146289	0.00158859	0.0017158	0.00184323	0.00196947	0.00209304
268.95	0.431676	148.148	0.000435994	0.0238156	0.46804	0.00132235	0.215404			3.57779e-06	4.66761e-06	6.05662e-06	7.81669e-06	1.00339e-05	1.28108e-05	1.62682e-05	2.05474e-05	2.58126e-05	3.22525e-05	4.00822e-05	4.95446e-05	6.09112e-05	7.44825e-05	9.05875e-05	0.000109582	0.000131846	0.000157779	0.000187797	0.000222323	0.000261781	0.000306582	0.000357119	0.000413748	0.000476776	0.000546449	0.000622933	0.000706301	0.000796516	0.000893421	0.000996722	0.00110598	0.00122062	0.00133988	0.00146289	0.00158859	0.0017158	0.00184323	0.00196947	0.00209304
270.1	0.459995	206.897	0.000690334	0.0377086	0.518343	0.00340446	0.293189			3.57779e-06	4.66761e-06	6.05662e-06	7.81669e-06	1.00339e-05	1.28108e-05	1.62682e-05	2.05474e-05	2.58126e-05	3.22525e-05	4.00822e-05	4.95446e-05	6.09112e-05	7.44825e-05	9.05875e-05	0.000109582	0.000131846	0.000157779	0.000187797	0.000222323	0.000261781	0.000306582	0.000357119	0.000413748	0.000476776	0.000546449	0.000622933	0.000706301	0.000796516	0.000893421	0.000996722	0.00110598	0.00122062	0.00133988	0.00146289	0.00158859	0.0017158	0.00184323	0.00196947	0.00209304
271.25	0.555024	342.857	0.000843551	0.0460779	0.591318	0.00131723	0.40655			3.57779e-06	4.66761e-06	6.05662e-06	7.81669e-06	1.00339e-05	1.28108e-05	1.62682e-05	2.05474e-05	2.58126e-05	3.22525e-05	4.00822e-05	4.95446e-05	6.09112e-05	7.44825e-05	9.05875e-05	0.000109582	0.000131846	0.000157779	0.000187797	0.000222323	0.000261781	0.000306582	0.000357119	0.000413748	0.000476776	0.000546449	0.000622933	0.000706301	0.000796516	0.000893421	0.000996722	0.00110598	0.00122062	0.00133988	0.00146289	0.00158859	0.0017158	0.00184323	0.00196947	0.00209304
272.4	0.721296	1000	0.000173501	0.0094773	0.693843	0.000753709	0.563467			3.57779e-06	4.66761e-06	6.05662e-06	7.81669e-06	1.00339e-05	1.28108e-05	1.62682e-05	2.05474e-05	2.58126e-05	3.22525e-05	4.00822e-05	4.95446e-05	6.09112e-05	7.44825e-05	9.05875e-05	0.000109582	0.000131846	0.000157779	0.000187797	0.000222323	0.000261781	0.000306582	0.000357119	0.000413748	0.000476776	0.000546449	0.000622933	0.000706301	0.000796516	0.000893421	0.000996722	0.00110598	0.00122062	0.00133988	0.00146289	0.00158859	0.0017158	0.00184323	0.00196947	0.00209304
273.55	0.920931	-1090.91	0.000175042	0.00956144	0.900357	0.000423302	0.893342			3.57779e-06	4.66761e-06	6.05662e-06	7.81669e-06	1.00339e-05	1.28108e-05	1.62682e-05	2.05474e-05	2.58126e-05	3.22525e-05	4.00822e-05	4.95446e-05	6.09112e-05	7.44825e-05	9.05875e-05	0.000109582	0.000131846	0.000157779	0.000187797	0.000222323	0.000261781	0.000306582	0.000357119	0.000413748	0.000476776	0.000546449	0.000622933	0.000706301	0.000796516	0.000893421	0.000996722	0.00110598	0.00122062	0.00133988	0.00146289	0.00158859	0.0017158	0.00184323	0.00196947	0.00209304
274.7	0.959737	-352.941	0.000325075	0.0177568	0.966385	4.41911e-05	1			3.57779e-06	4.66761e-06	6.05662e-06	7.81669e-06	1.00339e-05	1.28108e-05	1.62682e-05	2.05474e-05	2.58126e-05	3.22525e-05	4.00822e-05	4.95446e-05	6.09112e-05	7.44825e-05	9.05875e-05	0.000109582	0.000131846	0.000157779	0.000187797	0.000222323	0.000261781	0.000306582	0.000357119	0.000413748	0.000476776	0.000546449	0.000622933	0.000706301	0.000796516	0.000893421	0.000996722	0.00110598	0.00122062	0.00133988	0.00146289	0.00158859	0.0017158	0.00184323	0.00196947	0.00209304
275.85	0.96275	-210.526	7.09259e-05	0.00387424	0.957459	2.79989e-05	0.985267			3.57779e-06	4.66761e-06	6.05662e-06	7.81669e-06	1.00339e-05	1.28108e-05	1.62682e-05	2.05474e-05	2.58126e-05	3.22525e-05	4.00822e-05	4.95446e-05	6.09112e-05	7.44825e-05	9.05875e-05	0.000109582	0.000131846	0.000157779	0.000187797	0.000222323	0.000261781	0.000306582	0.000357119	0.000413748	0.000476776	0.000546449	0.000622933	0.000706301	0.000796516	0.000893421	0.000996722	0.00110598	0.00122062	0.00133988	0.00146289	0.00158859	0.0017158	0.00184323	0.00196947	0.00209304
[truncated: 40 more columns]
