# Supplementary figures and images for: Melting of aqueous NaCl solutions in porous materials: shifted phase transition distribution (SIDI) approach for determining NMR cryoporometry pore size distributions
Source: Royal Society of Chemistry journal article supplement (doi:10.1039/d3cp04029a), 2023-12-27

sidi\_ pore size distribution, (if sidi), with wanted reference of 275.850 K

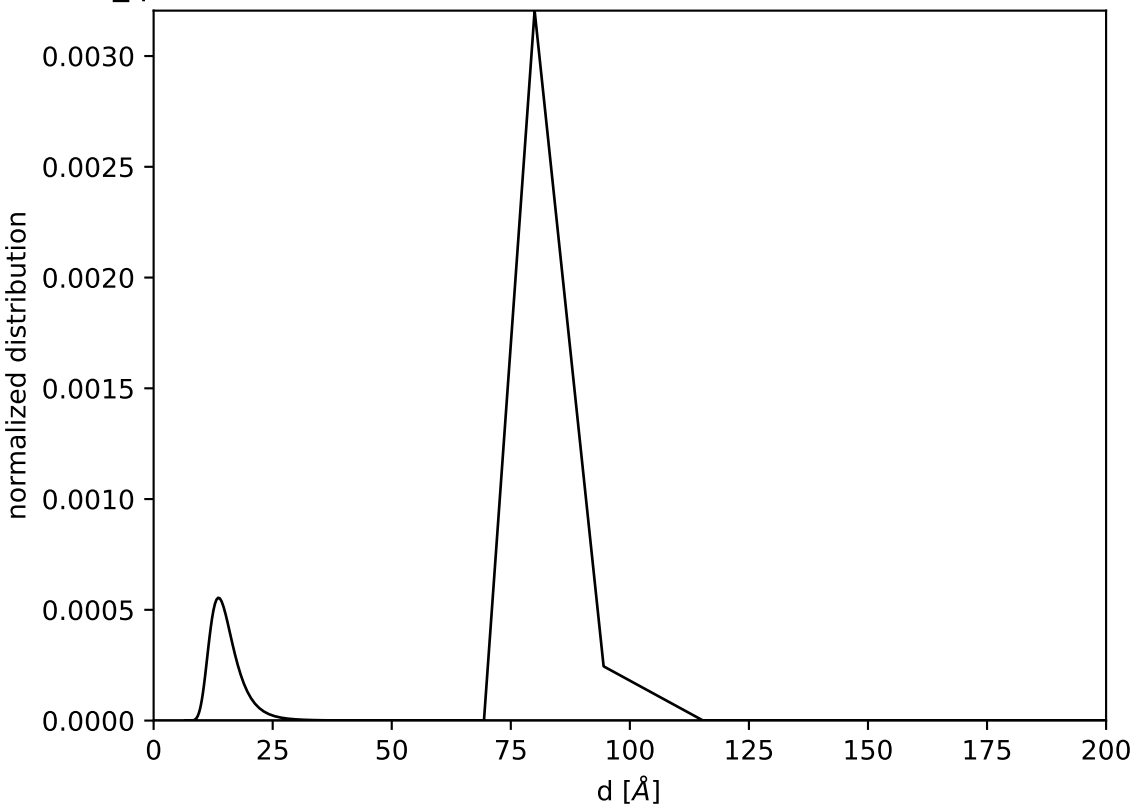

Supplement: d3cp04029a6.zip [file d3cp04029a6.zip]

Melting curve: Model vs Measured. Err: 0.0692294

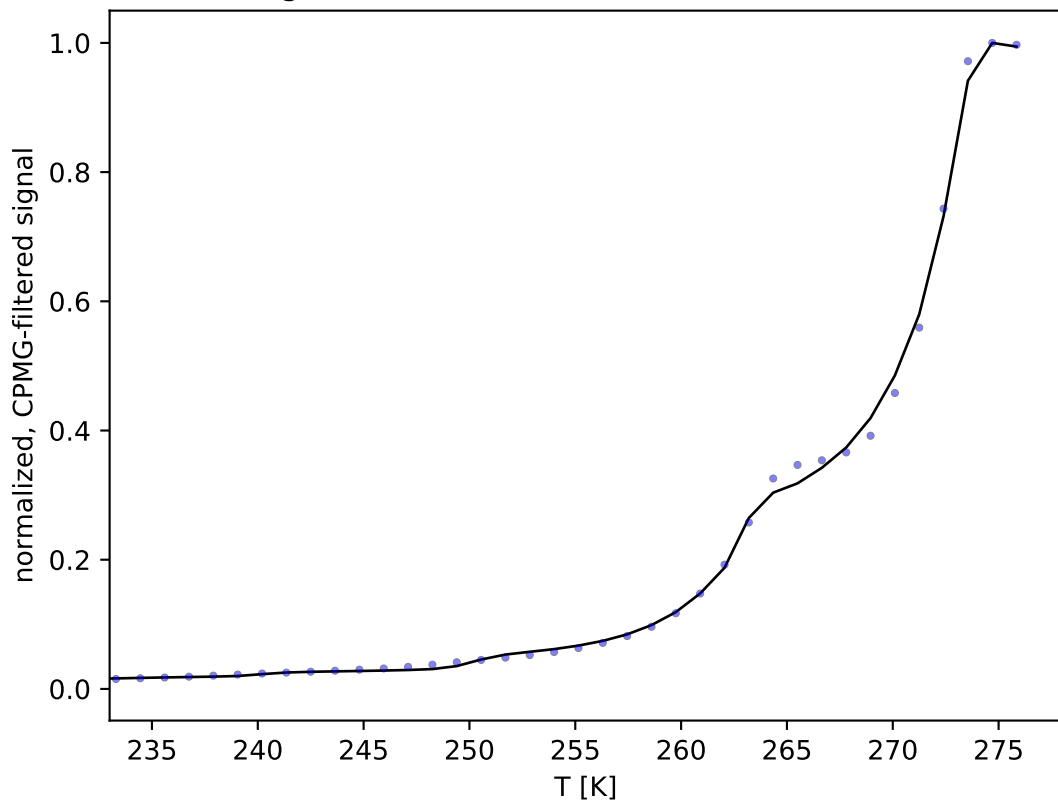

Supplement: d3cp04029a6.zip [file d3cp04029a6.zip]

conventional\_ pore size distribution, (if sisi), with wanted reference of 275.85

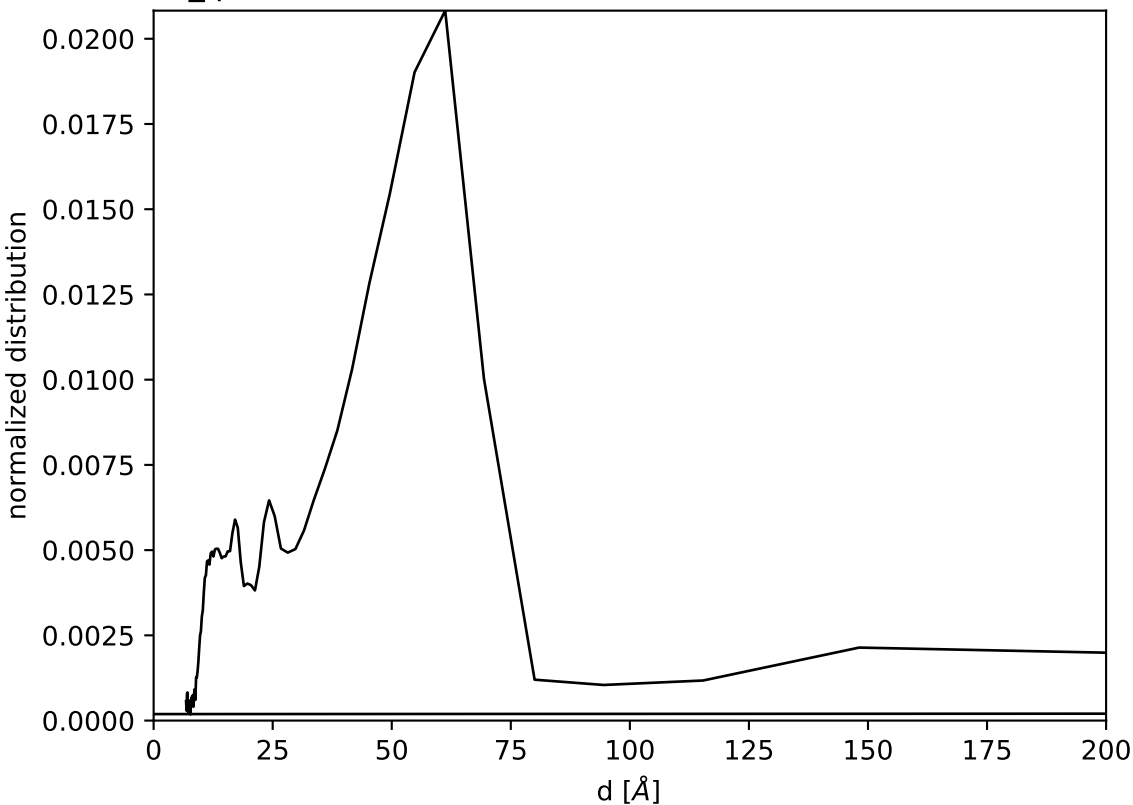

Supplement: d3cp04029a6.zip [file d3cp04029a6.zip]

sidi\_ pore size distribution

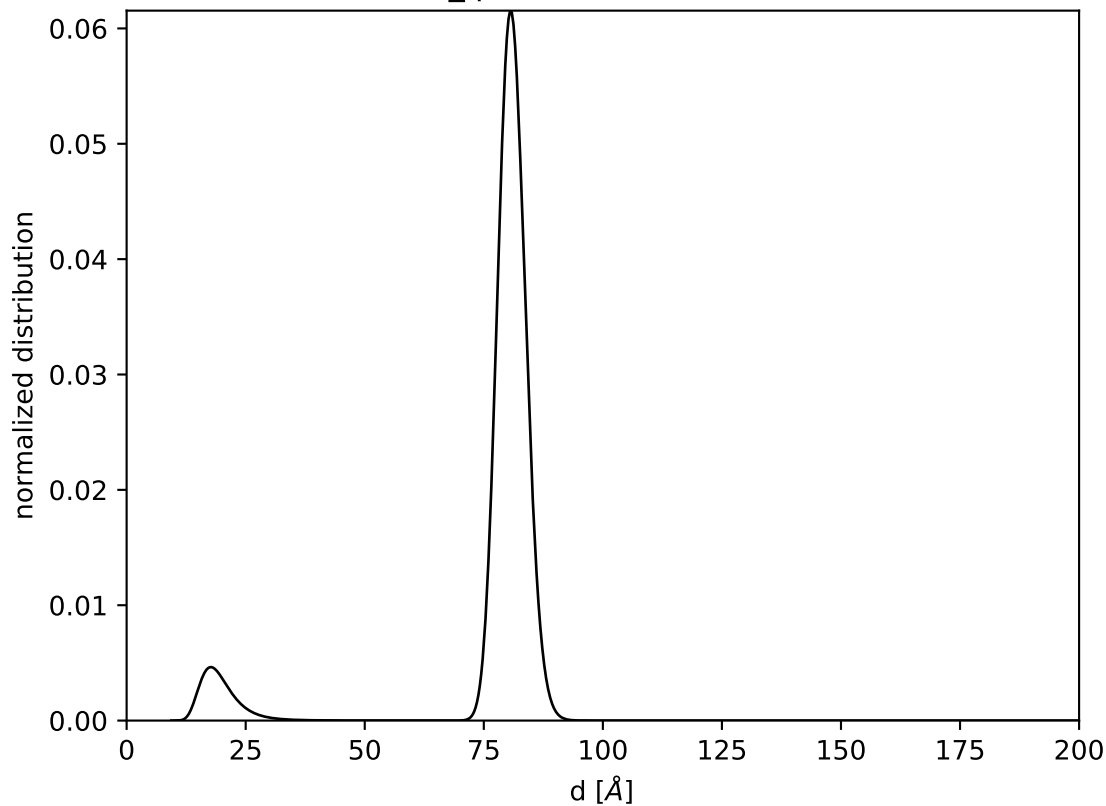

Supplement: d3cp04029a6.zip [file d3cp04029a6.zip]

PMD as a (spline-interpolated) derivative of a melting curve

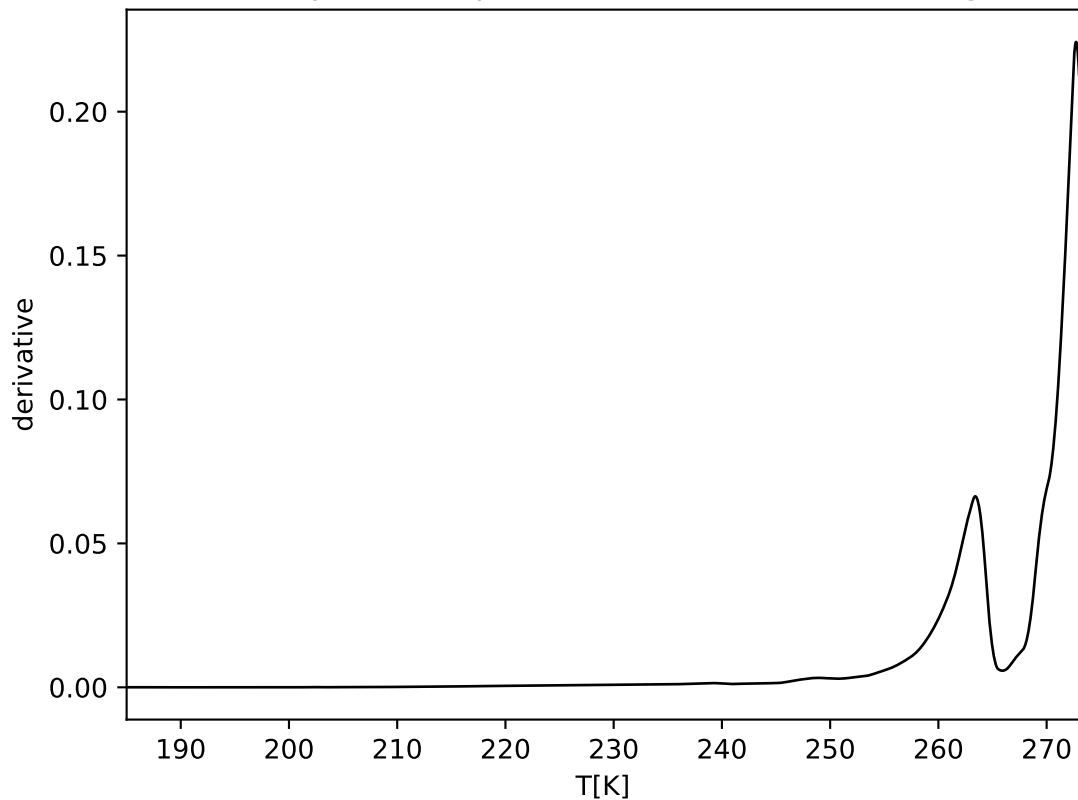

Supplement: d3cp04029a6.zip [file d3cp04029a6.zip]

melting point distribution

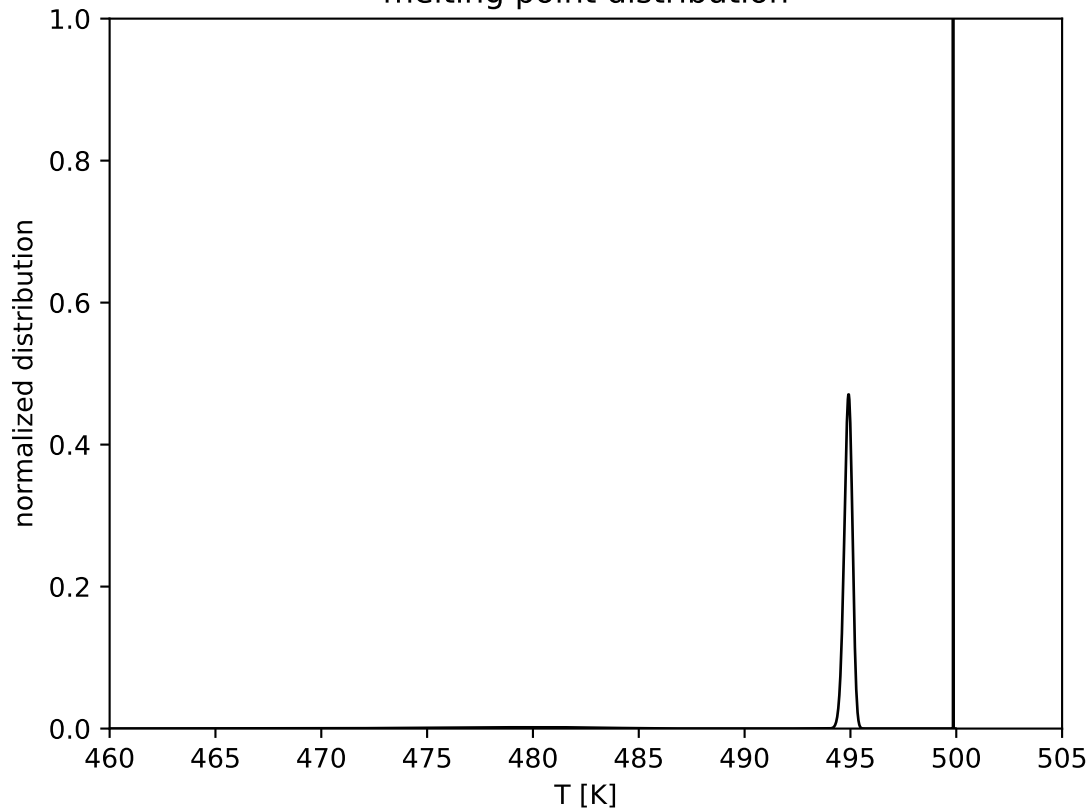

Supplement: d3cp04029a6.zip [file d3cp04029a6.zip]

Pore size distribution

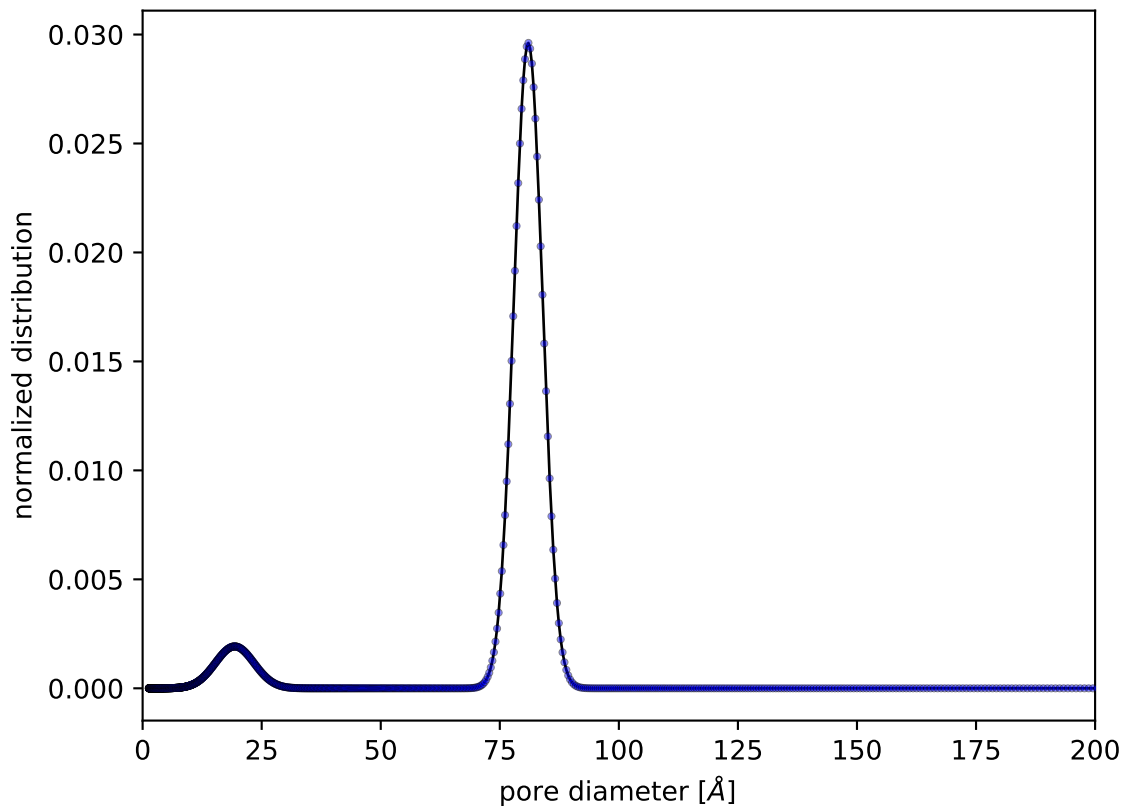

Supplement: d3cp04029a6.zip [file d3cp04029a6.zip]

Melting curve: Model vs Measured. Err: 0.0589946

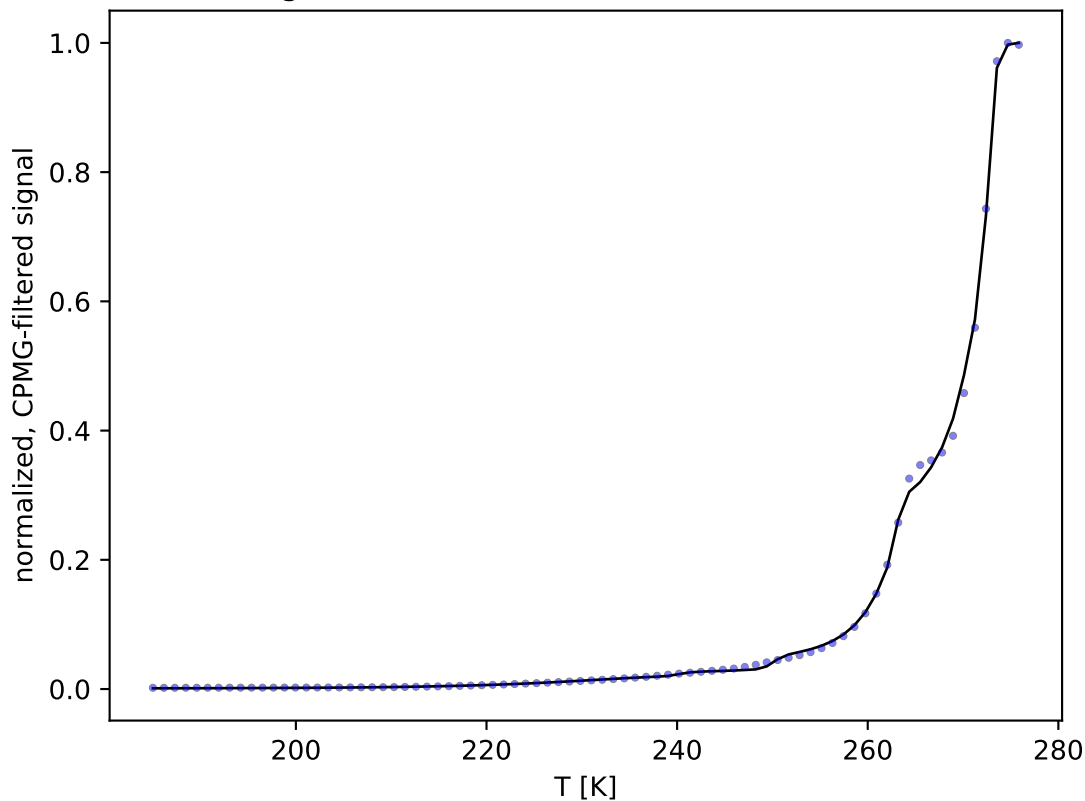

Supplement: d3cp04029a6.zip [file d3cp04029a6.zip]

PMD as a (spline-interpolated) derivative of a melting curve

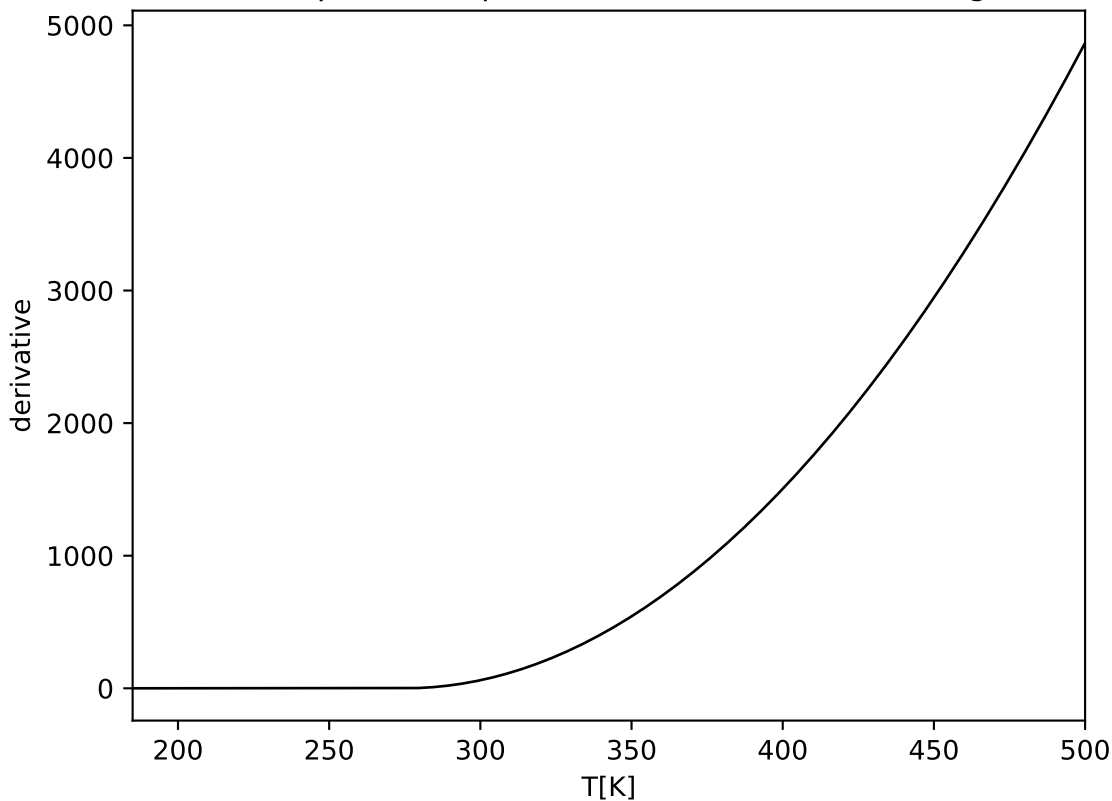

Supplement: d3cp04029a6.zip [file d3cp04029a6.zip]

Melting curve, bulk saline \_in\_pores\_ as inputs

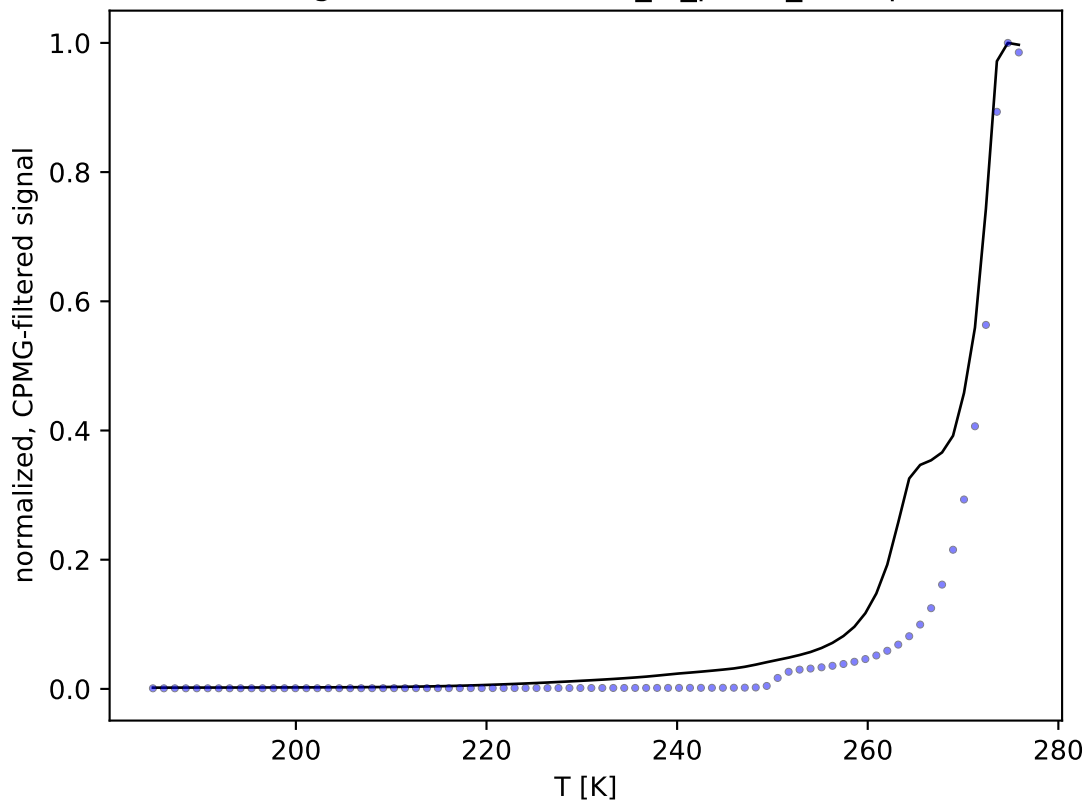

Supplement: d3cp04029a6.zip [file d3cp04029a6.zip]

Melting curve: Model vs Measured. Err: 0.0595165

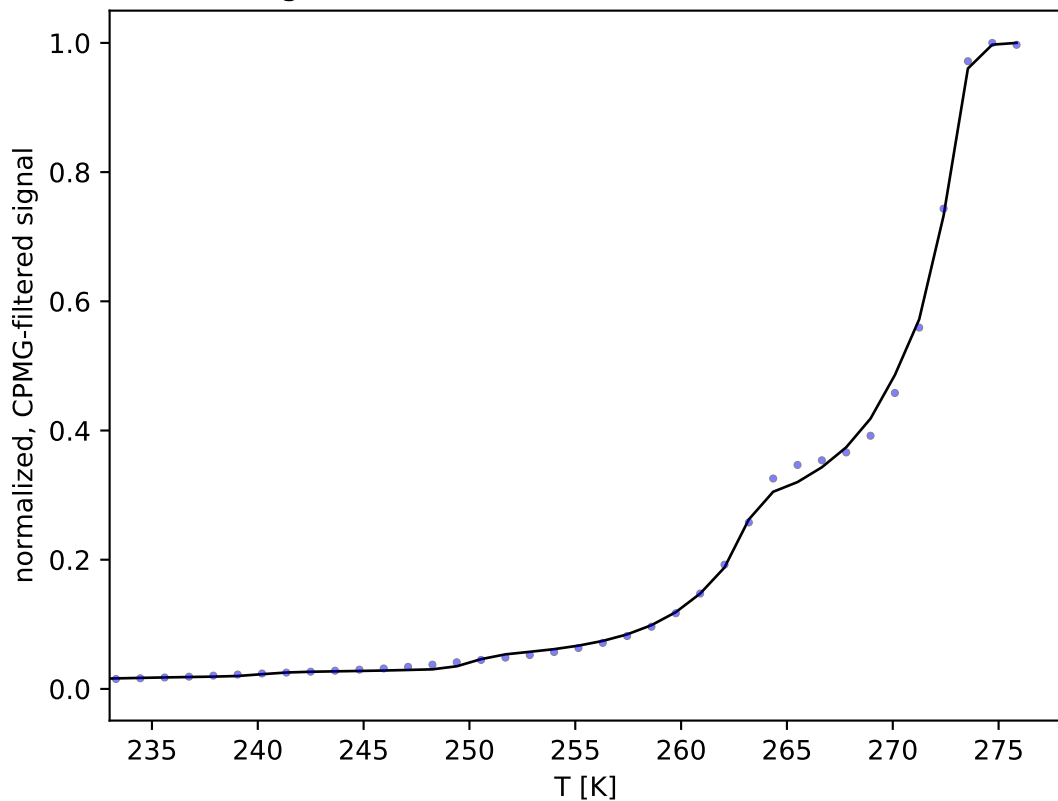

Supplement: d3cp04029a6.zip [file d3cp04029a6.zip]

PMD as a (spline-interpolated) derivative of a melting curve

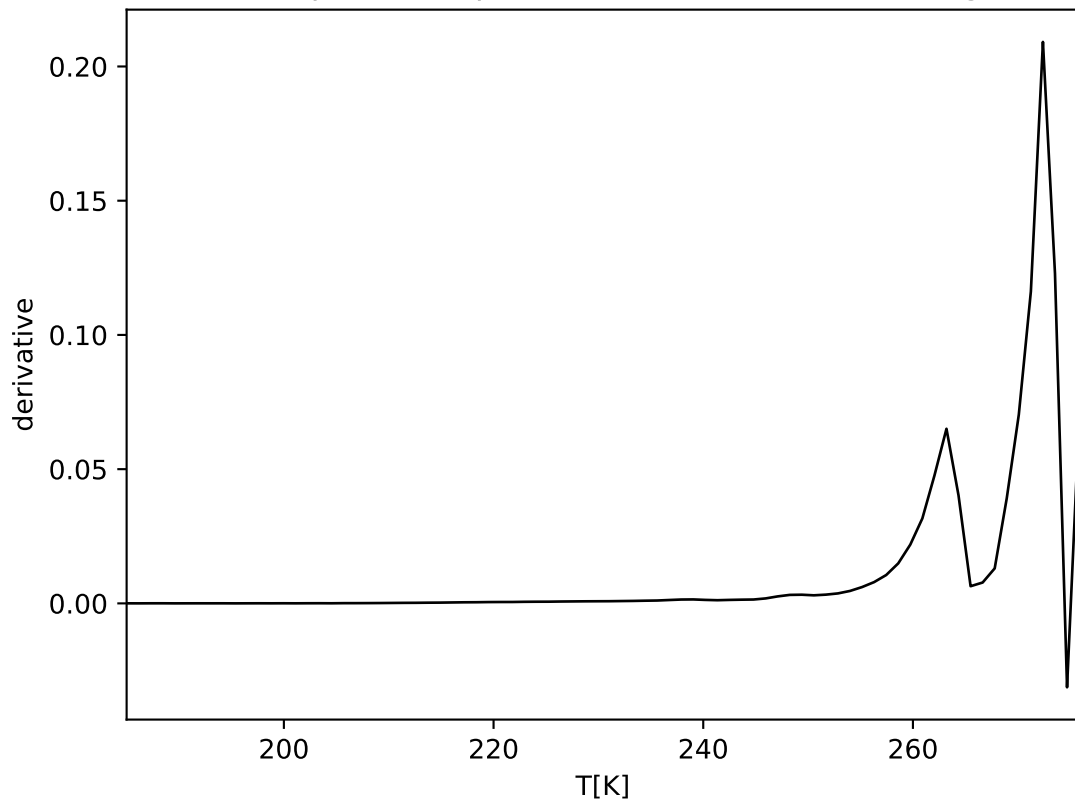

Supplement: d3cp04029a6.zip [file d3cp04029a6.zip]

Melting curve, bulk saline \_in\_pores\_ as inputs



Supplement: d3cp04029a6.zip [file d3cp04029a6.zip]

Melting curve, bulk saline \_in\_pores\_ as inputs



Supplement: d3cp04029a6.zip [file d3cp04029a6.zip]

conventional\_pore size distribution

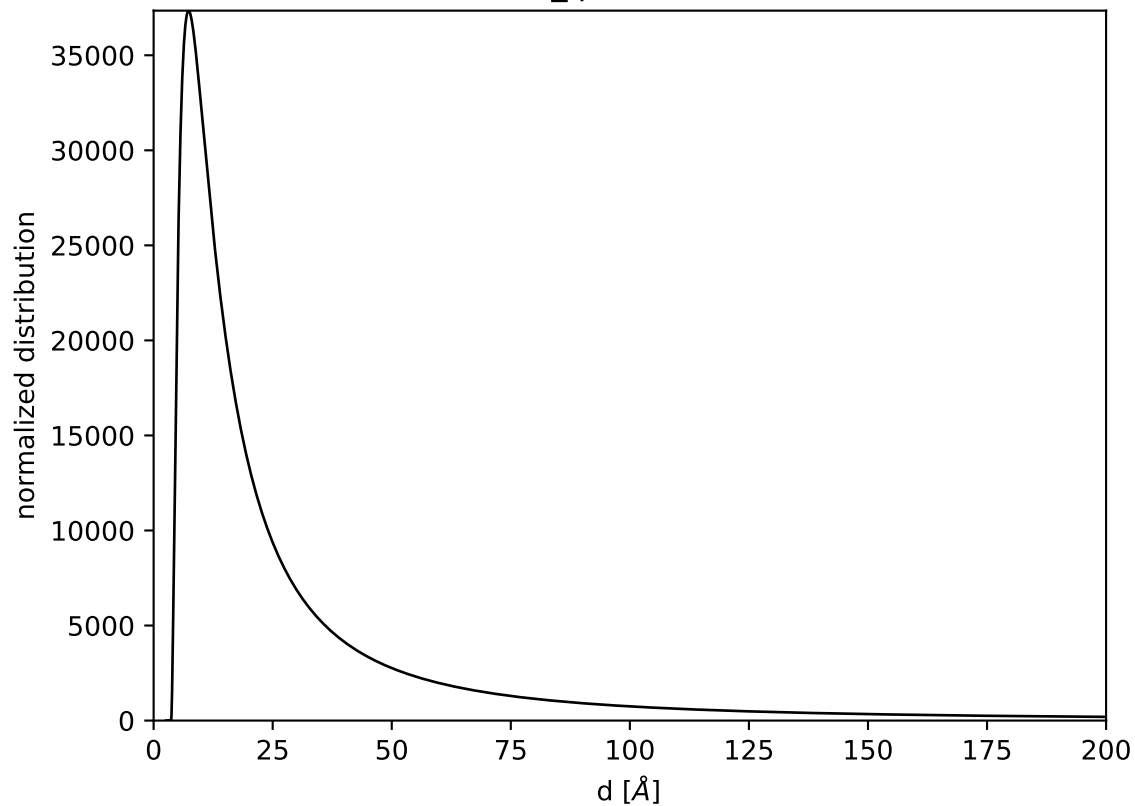

Supplement: d3cp04029a6.zip [file d3cp04029a6.zip]

Meltin point distribution

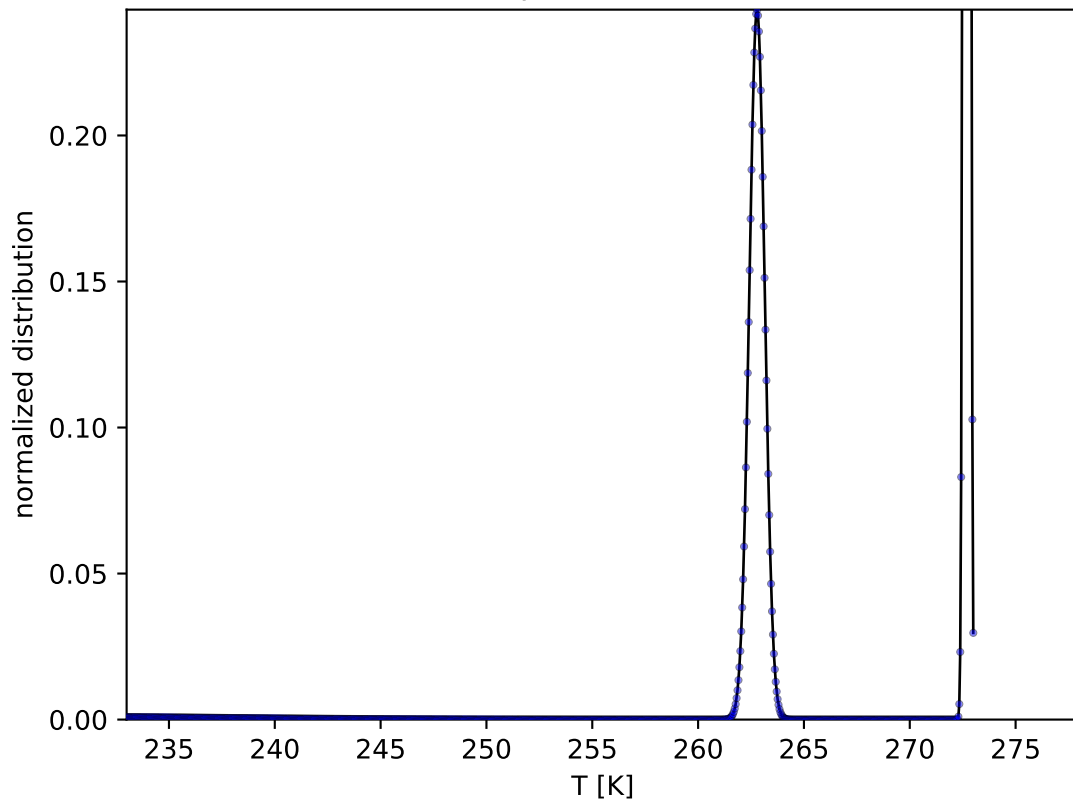

Supplement: d3cp04029a6.zip [file d3cp04029a6.zip]

melting point distribution

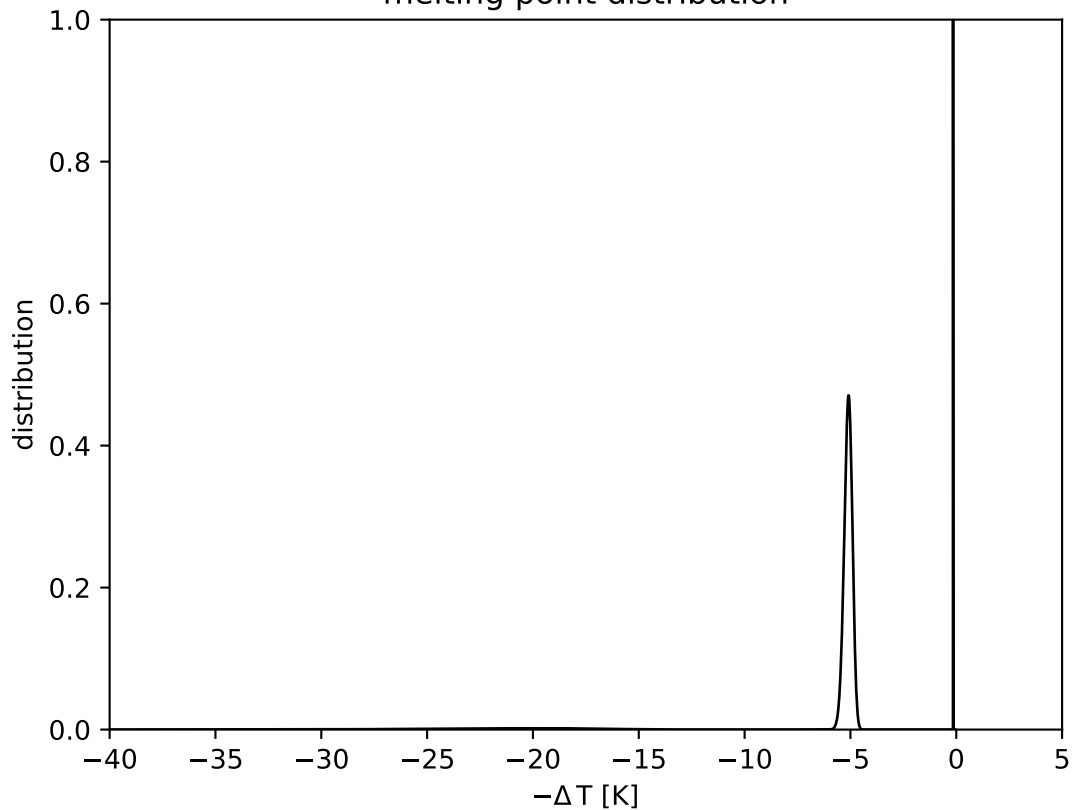

Supplement: d3cp04029a6.zip [file d3cp04029a6.zip]

Meltin point distribution

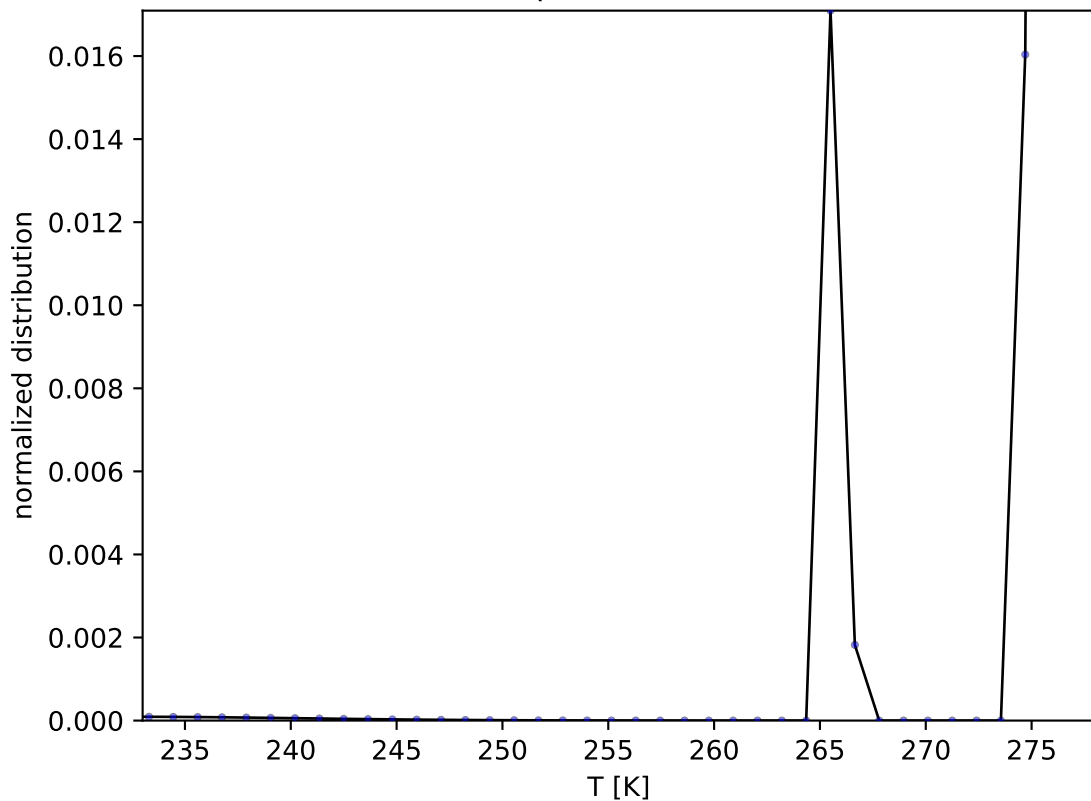

Supplement: d3cp04029a6.zip [file d3cp04029a6.zip]

conventional\_ pore size distribution

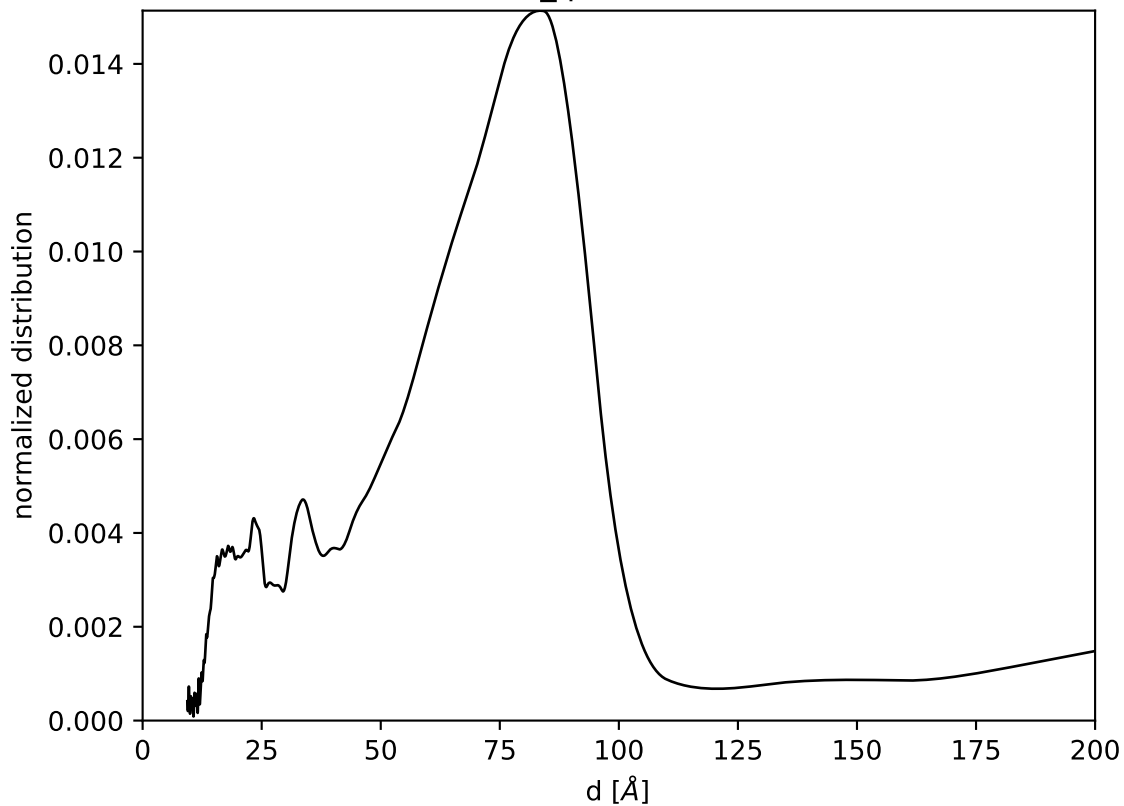

Supplement: d3cp04029a6.zip [file d3cp04029a6.zip]
